# Supplementary material for: Identification of Polycystic Ovary Syndrome (PCOS) Specific Genes in Cumulus and Mural Granulosa Cells
Source: PLoS One. 2016 Dec 20;11(12):e0168875. doi: 10.1371/journal.pone.0168875 (PMC5173369; doi:10.1371/journal.pone.0168875)
Supplement: S1 Table — PCOS-specific DEGs, Common DEGs and Control-specific DEGs were given in 3 independent sheets. Each sheet includes the p-value, fold change and annotation of each DEG. (XLSX) [file pone.0168875.s003.xlsx]

## Sheet: PCOS-specific DEGs
Parametric p-value	FDR	Fold-change (Cumulus/Granulosa)	ProbeSet	Symbol	Name	EntrezID	Accession	UGCluster	DefinedGenelist
< 1e-07	< 1e-07	0.1	217757_at	A2M	alpha-2-macroglobulin	2	J04162	Hs.372679	Leishmaniasis, Natural killer cell mediated cytotoxicity, Osteoclast differentiation, Phagosome, Staphylococcus aureus infection, Systemic lupus erythematosus
2e-07	6.63e-07	0.23	210852_s_at	AASS	aminoadipate-semialdehyde synthase	10157	BF679849	Hs.370503
9.4e-06	2.11e-05	0.11	203504_s_at	ABCA1	ATP-binding cassette, sub-family A (ABC1), member 1	19	AI123251	Hs.304475	Fc epsilon RI signaling pathway, Natural killer cell mediated cytotoxicity, Osteoclast differentiation, T cell receptor signaling pathway
1.61e-05	3.46e-05	4.19	213353_at	ABCA5	ATP-binding cassette, sub-family A (ABC1), member 5	23461	AF313468	Hs.143929	Phagosome
< 1e-07	< 1e-07	0.11	217504_at	ABCA6	ATP-binding cassette, sub-family A (ABC1), member 6	23460	BC001606	Hs.587558	fMLP induced chemokine gene expression in HMC-1 cells, Rac 1 cell motility signaling pathway, Leishmaniasis, Leukocyte transendothelial migration, Osteoclast differentiation, Phagosome
0.0006574	0.00106	0.21	221267_s_at	ABHD17A	abhydrolase domain containing 17A	81926	NM_001736	Hs.2161	Complement and coagulation cascades, Neuroactive ligand-receptor interaction, Staphylococcus aureus infection
1.6e-06	4.33e-06	0.18	213017_at	ABHD3	abhydrolase domain containing 3	171586	NM_005335	Hs.14601	Bacterial invasion of epithelial cells, Pathogenic Escherichia coli infection, Shigellosis, Tight junction
4.22e-05	8.43e-05	0.24	213805_at	ABHD5	abhydrolase domain containing 5	51099	NM_001557	Hs.846	Chemokine signaling pathway, Cytokine-cytokine receptor interaction, Endocytosis, Epithelial cell signaling in Helicobacter pylori infection
< 1e-07	< 1e-07	0.084	229164_s_at	ABTB1	ankyrin repeat and BTB (POZ) domain containing 1	80325	NM_000655	Hs.728756	Adhesion and Diapedesis of Granulocytes, Adhesion and Diapedesis of Lymphocytes, Adhesion Molecules on Lymphocyte, Monocyte and its Surface Molecules, Neutrophil and Its Surface Molecules, Cell adhesion molecules (CAMs)
4.5e-06	1.09e-05	0.25	226442_at	ABTB1	ankyrin repeat and BTB (POZ) domain containing 1	80325	NM_004244	Hs.504641
< 1e-07	< 1e-07	0.16	205213_at	ACAP1	ArfGAP with coiled-coil, ankyrin repeat and PH domains 1	9744	NM_000295	Hs.525557	Complement and coagulation cascades
3e-07	9.59e-07	11.8	222257_s_at	ACE2	angiotensin I converting enzyme 2	59272	NM_006682	Hs.520989
1.8e-06	4.8e-06	15.79	219962_at	ACE2	angiotensin I converting enzyme 2	59272	NM_004665	Hs.293130	Pantothenate and CoA biosynthesis
< 1e-07	3.48e-07	4.65	242270_at	ACP6	acid phosphatase 6, lysophosphatidic	51205	AW135176	Hs.520989
< 1e-07	< 1e-07	0.029	204393_s_at	ACPP	acid phosphatase, prostate	55	NM_030769	Hs.496969	Amino sugar and nucleotide sugar metabolism
2.9e-06	7.38e-06	0.17	231711_at	ACPP	acid phosphatase, prostate	55	AI130690	Hs.182014	Regulation of actin cytoskeleton
< 1e-07	< 1e-07	0.12	223717_s_at	ACRBP	acrosin binding protein	84519	NM_002029	Hs.753	fMLP induced chemokine gene expression in HMC-1 cells, Neuroactive ligand-receptor interaction, Staphylococcus aureus infection
1.68e-05	3.6e-05	0.25	238825_at	ACRC	acidic repeat containing	93953	L06633	Hs.270
< 1e-07	< 1e-07	0.037	207275_s_at	ACSL1	acyl-CoA synthetase long-chain family member 1	2180	M21121	Hs.514821	The Role of Eosinophils in the Chemokine Network of Allergy, Chagas disease (American trypanosomiasis), Chemokine signaling pathway, Cytokine-cytokine receptor interaction, Cytosolic DNA-sensing pathway, Epithelial cell signaling in Helicobacter pylori infection, NOD-like receptor signaling pathway, Prion diseases, Rheumatoid arthritis, Toll-like receptor signaling pathway
1.1e-06	3.1e-06	0.078	201963_at	ACSL1	acyl-CoA synthetase long-chain family member 1	2180	AL050262	Hs.621817	Toll-like receptor signaling pathway
1.2e-06	3.35e-06	0.13	1557418_at	ACSL4	acyl-CoA synthetase long-chain family member 4	2182	NM_002838	Hs.654514	Activation of Csk by cAMP-dependent Protein Kinase Inhibits Signaling through the T Cell Receptor, B Lymphocyte Cell Surface Molecules, Lck and Fyn tyrosine kinases in initiation of TCR Activation, T Cytotoxic Cell Surface Molecules, T Helper Cell Surface Molecules, Cell adhesion molecules (CAMs), Fc gamma R-mediated phagocytosis, Primary immunodeficiency, T cell receptor signaling pathway
2.57e-05	5.31e-05	0.19	1557419_a_at	ACSL4	acyl-CoA synthetase long-chain family member 4	2182	AI742838	Hs.368203
< 1e-07	3.48e-07	0.2	222592_s_at	ACSL5	acyl-CoA synthetase long-chain family member 5	51703	Z22969	Hs.504641
< 1e-07	3.48e-07	0.21	218322_s_at	ACSL5	acyl-CoA synthetase long-chain family member 5	51703	BF740152	Hs.465818
4e-07	1.25e-06	0.1	AFFX-HSAC07/X00351_5_at	ACTB	actin, beta	60	U10485	Hs.124922
1.8e-06	4.8e-06	0.22	AFFX-HSAC07/X00351_M_at	ACTB	actin, beta	60	AI093231	Hs.310421
< 1e-07	< 1e-07	0.11	214895_s_at	ADAM10	ADAM metallopeptidase domain 10	102	BF593625	Hs.371720	Aspirin Blocks Signaling Pathway Involved in Platelet Activation, BCR Signaling Pathway, Fc Epsilon Receptor I Signaling in Mast Cells, IL 2 signaling pathway, IL-2 Receptor Beta Chain in T cell Activation, Ras-Independent pathway in NK cell-mediated cytotoxicity, B cell receptor signaling pathway, Fc epsilon RI signaling pathway, Fc gamma R-mediated phagocytosis, Natural killer cell mediated cyt…
< 1e-07	< 1e-07	13.21	213790_at	ADAM12	ADAM metallopeptidase domain 12	8038	NM_024021	Hs.325960
< 1e-07	< 1e-07	14.23	202952_s_at	ADAM12	ADAM metallopeptidase domain 12	8038	AA702701	Hs.376675	Adhesion and Diapedesis of Granulocytes, Adhesion and Diapedesis of Lymphocytes, Adhesion Molecules on Lymphocyte, Cell to Cell Adhesion Signaling, Monocyte and its Surface Molecules, Neutrophil and Its Surface Molecules, Cell adhesion molecules (CAMs), Leukocyte transendothelial migration, Malaria
< 1e-07	< 1e-07	18.77	226777_at	ADAM12	ADAM metallopeptidase domain 12	8038	U20350	Hs.78913	Chemokine signaling pathway, Cytokine-cytokine receptor interaction
< 1e-07	< 1e-07	4.98	213808_at	ADAM23	ADAM metallopeptidase domain 23	8745	N37023	Hs.551713
< 1e-07	< 1e-07	0.076	205180_s_at	ADAM8	ADAM metallopeptidase domain 8	101	AI768563	Hs.654668
8.2e-06	1.86e-05	0.097	222162_s_at	ADAMTS1	ADAM metallopeptidase with thrombospondin type 1 motif, 1	9510	NM_018326	Hs.647101
< 1e-07	< 1e-07	0.13	222486_s_at	ADAMTS1	ADAM metallopeptidase with thrombospondin type 1 motif, 1	9510	AF004231	Hs.655652	Osteoclast differentiation
2e-06	5.25e-06	10.49	237411_at	ADAMTS6	ADAM metallopeptidase with thrombospondin type 1 motif, 6	11174	AI301935	Hs.530735
< 1e-07	< 1e-07	0.08	226814_at	ADAMTS9	ADAM metallopeptidase with thrombospondin type 1 motif, 9	56999	AA810265	Hs.32942	AKT Signaling Pathway, B Cell Survival Pathway, Control of skeletal myogenesis by HDAC & calcium/calmodulin-dependent kinase (CaMK), Corticosteroids and cardioprotection, CTCF: First Multivalent Nuclear Factor, Erk and PI-3 Kinase Are Necessary for Collagen Binding in Corneal Epithelia, Fc Epsilon Receptor I Signaling in Mast Cells, Growth Hormone Signaling Pathway, Human Cytomegalovirus and Map …
< 1e-07	< 1e-07	0.14	220287_at	ADAMTS9	ADAM metallopeptidase with thrombospondin type 1 motif, 9	56999	AA053711	Hs.482730
< 1e-07	< 1e-07	0.18	1554697_at	ADAMTS9	ADAM metallopeptidase with thrombospondin type 1 motif, 9	56999	NM_012072	Hs.97199
< 1e-07	< 1e-07	0.23	90265_at	ADAP1	ArfGAP with dual PH domains 1	11033	NM_006866	Hs.655593	Osteoclast differentiation
< 1e-07	< 1e-07	0.079	219358_s_at	ADAP2	ArfGAP with dual PH domains 2	55803	NM_002110	Hs.655210	HIV-1 defeats host-mediated resistance by CEM15, Roles of b-arrestin-dependent Recruitment of Src Kinases in GPCR Signaling, Chemokine signaling pathway, Fc gamma R-mediated phagocytosis
< 1e-07	< 1e-07	0.093	222876_s_at	ADAP2	ArfGAP with dual PH domains 2	55803	AF119873	Hs.525557	Complement and coagulation cascades
< 1e-07	3.48e-07	0.13	203741_s_at	ADCY7	adenylate cyclase 7	113	NM_024711	Hs.647105
< 1e-07	< 1e-07	0.18	207111_at	ADGRE1	adhesion G protein-coupled receptor E1	2015	AI421071	Hs.301921	Selective expression of chemokine receptors during T-cell polarization, Chemokine signaling pathway, Cytokine-cytokine receptor interaction
< 1e-07	< 1e-07	0.15	210724_at	ADGRE3	adhesion G protein-coupled receptor E3	84658	NM_005248	Hs.1422	Roles of b-arrestin-dependent Recruitment of Src Kinases in GPCR Signaling, Chemokine signaling pathway
< 1e-07	< 1e-07	0.028	202910_s_at	ADGRE5	adhesion G protein-coupled receptor E5	976	L03419	Hs.534956
< 1e-07	< 1e-07	0.17	220404_at	ADGRG3	adhesion G protein-coupled receptor G3	222487	NM_005574	Hs.34560
9.27e-05	0.000175	0.2	217748_at	ADIPOR1	adiponectin receptor 1	51094	NM_017923	Hs.592804
< 1e-07	< 1e-07	0.18	206170_at	ADRB2	adrenoceptor beta 2, surface	154	NM_020980	Hs.104624	Bile secretion
< 1e-07	< 1e-07	0.14	225827_at	AGO2	argonaute RISC catalytic component 2	27161	L32185	Hs.591607	Lysosome
1e-07	3.48e-07	0.2	224480_s_at	AGPAT9	1-acylglycerol-3-phosphate O-acyltransferase 9	84803	NM_002155	Hs.654614	Antigen processing and presentation, Endocytosis, MAPK signaling pathway, Protein processing in endoplasmic reticulum, Spliceosome, Toxoplasmosis
< 1e-07	< 1e-07	0.019	209901_x_at	AIF1	allograft inflammatory factor 1	199	NM_000632	Hs.172631	Adhesion and Diapedesis of Granulocytes, Monocyte and its Surface Molecules, Neutrophil and Its Surface Molecules, Amoebiasis, Cell adhesion molecules (CAMs), Hematopoietic cell lineage, Leishmaniasis, Leukocyte transendothelial migration, Phagosome, Regulation of actin cytoskeleton, Staphylococcus aureus infection
< 1e-07	< 1e-07	0.026	215051_x_at	AIF1	allograft inflammatory factor 1	199	AF301007	Hs.284813
< 1e-07	< 1e-07	0.029	213095_x_at	AIF1	allograft inflammatory factor 1	199	U13700	Hs.2490	Caspase Cascade in Apoptosis, D4-GDI Signaling Pathway, IL 18 Signaling Pathway, Amyotrophic lateral sclerosis (ALS), Cytosolic DNA-sensing pathway, NOD-like receptor signaling pathway
< 1e-07	< 1e-07	0.24	206513_at	AIM2	absent in melanoma 2	9447	M87507	Hs.2490	Caspase Cascade in Apoptosis, D4-GDI Signaling Pathway, IL 18 Signaling Pathway, Amyotrophic lateral sclerosis (ALS), Cytosolic DNA-sensing pathway, NOD-like receptor signaling pathway
5.61e-05	0.00011	4.56	1553764_a_at	AJUBA	ajuba LIM protein	84962	AI719655	Hs.2490	Caspase Cascade in Apoptosis, D4-GDI Signaling Pathway, IL 18 Signaling Pathway, Amyotrophic lateral sclerosis (ALS), Cytosolic DNA-sensing pathway, NOD-like receptor signaling pathway
1e-06	2.86e-06	8.7	225806_at	AJUBA	ajuba LIM protein	84962	NM_002985	Hs.514821	The Role of Eosinophils in the Chemokine Network of Allergy, Chagas disease (American trypanosomiasis), Chemokine signaling pathway, Cytokine-cytokine receptor interaction, Cytosolic DNA-sensing pathway, Epithelial cell signaling in Helicobacter pylori infection, NOD-like receptor signaling pathway, Prion diseases, Rheumatoid arthritis, Toll-like receptor signaling pathway
2.26e-05	4.72e-05	4.21	225342_at	AK4	adenylate kinase 4	205	W84421	Hs.561411
1.3e-06	3.6e-06	5.82	230630_at	AK4	adenylate kinase 4	205	BF590697	Hs.744920
2e-07	6.63e-07	0.23	236006_s_at	AKAP10	A kinase (PRKA) anchor protein 10	11216	NM_006762	Hs.371021	Lysosome
0.0002125	0.000375	0.23	215483_at	AKAP9	A kinase (PRKA) anchor protein 9	10142	AI741188	Hs.435949
< 1e-07	< 1e-07	0.089	225701_at	AKNA	AT-hook transcription factor	80709	NM_003105	Hs.368592
7.42e-05	0.000142	0.25	218489_s_at	ALAD	aminolevulinate dehydratase	210	NM_000397	Hs.292356	Leukocyte transendothelial migration, Osteoclast differentiation, Phagosome
1.1e-06	3.1e-06	0.038	211560_s_at	ALAS2	5'-aminolevulinate synthase 2	212	NM_022136	Hs.473341
2.6e-06	6.67e-06	4.25	217791_s_at	ALDH18A1	aldehyde dehydrogenase 18 family, member A1	5832	NM_002664	Hs.468840
< 1e-07	< 1e-07	5.61	222416_at	ALDH18A1	aldehyde dehydrogenase 18 family, member A1	5832	AI445650	Hs.2200	Caspase Cascade in Apoptosis, CTL mediated immune response against target cells , D4-GDI Signaling Pathway, Granzyme A mediated Apoptosis Pathway, Allograft rejection, Autoimmune thyroid disease, Graft-versus-host disease, Natural killer cell mediated cytotoxicity, Type I diabetes mellitus, Viral myocarditis
1.03e-05	2.28e-05	0.19	203180_at	ALDH1A3	aldehyde dehydrogenase 1 family, member A3	220	NM_002350	Hs.491767	BCR Signaling Pathway, Eph Kinases and ephrins support platelet aggregation, Fc Epsilon Receptor I Signaling in Mast Cells, Phosphoinositides and their downstream targets., B cell receptor signaling pathway, Chemokine signaling pathway, Epithelial cell signaling in Helicobacter pylori infection, Fc epsilon RI signaling pathway, Fc gamma R-mediated phagocytosis, Long-term depression
0.0002136	0.000376	10.17	231202_at	ALDH1L2	aldehyde dehydrogenase 1 family, member L2	160428	NM_015364	Hs.726603	Pathogenic Escherichia coli infection, Toll-like receptor signaling pathway, Toxoplasmosis
6e-07	1.81e-06	0.1	204174_at	ALOX5AP	arachidonate 5-lipoxygenase-activating protein	241	AW575754	Hs.310456	B cell receptor signaling pathway
3.9e-06	9.59e-06	5.85	228367_at	ALPK2	alpha-kinase 2	115701	D29642	Hs.531807
< 1e-07	< 1e-07	0.032	228094_at	AMICA1	adhesion molecule, interacts with CXADR antigen 1	120425	AF076642	Hs.440890
1.64e-05	3.52e-05	6.72	222108_at	AMIGO2	adhesion molecule with Ig-like domain 2	347902	NM_002965	Hs.112405
0.0006297	0.00102	4.86	211148_s_at	ANGPT2	angiopoietin 2	285	NM_005461	Hs.169487
3.8e-06	9.37e-06	6.55	237261_at	ANGPT2	angiopoietin 2	285	AF261135	Hs.741589
2e-07	6.63e-07	8.72	236034_at	ANGPT2	angiopoietin 2	285	AI356412	Hs.491767	BCR Signaling Pathway, Eph Kinases and ephrins support platelet aggregation, Fc Epsilon Receptor I Signaling in Mast Cells, Phosphoinositides and their downstream targets., B cell receptor signaling pathway, Chemokine signaling pathway, Epithelial cell signaling in Helicobacter pylori infection, Fc epsilon RI signaling pathway, Fc gamma R-mediated phagocytosis, Long-term depression
2e-07	6.63e-07	13.04	205572_at	ANGPT2	angiopoietin 2	285	AW574504	Hs.376675	Adhesion and Diapedesis of Granulocytes, Adhesion and Diapedesis of Lymphocytes, Adhesion Molecules on Lymphocyte, Cell to Cell Adhesion Signaling, Monocyte and its Surface Molecules, Neutrophil and Its Surface Molecules, Cell adhesion molecules (CAMs), Leukocyte transendothelial migration, Malaria
< 1e-07	< 1e-07	6.32	206385_s_at	ANK3	ankyrin 3, node of Ranvier (ankyrin G)	288	NM_002510	Hs.190495
< 1e-07	< 1e-07	0.021	238439_at	ANKRD22	ankyrin repeat domain 22	118932	NM_000560	Hs.443057
< 1e-07	< 1e-07	0.14	239196_at	ANKRD22	ankyrin repeat domain 22	118932	NM_002017	Hs.504281
3e-07	9.59e-07	0.16	1561079_at	ANKRD28	ankyrin repeat domain 28	23243	AA045175	Hs.523702
7.69e-05	0.000147	7.76	1569040_s_at	ANKRD36BP2	ankyrin repeat domain 36B pseudogene 2	645784	NM_130759	Hs.647079
< 1e-07	< 1e-07	0.029	226641_at	ANKRD44	ankyrin repeat domain 44	91526	T64884	Hs.744920
< 1e-07	< 1e-07	0.065	228471_at	ANKRD44	ankyrin repeat domain 44	91526	D50683	Hs.82028	ALK in cardiac myocytes, CTCF: First Multivalent Nuclear Factor, NFkB activation by Nontypeable Hemophilus influenzae, Role of Tob in T-cell activation, TGF beta signaling pathway, Adherens junction, Chagas disease (American trypanosomiasis), Chronic myeloid leukemia, Colorectal cancer, Cytokine-cytokine receptor interaction, Endocytosis, MAPK signaling pathway, Osteoclast differentiation, Pancre…
6.2e-06	1.45e-05	4.42	212731_at	ANKRD46	ankyrin repeat domain 46	157567	NM_014882	Hs.531807
< 1e-07	< 1e-07	0.039	202888_s_at	ANPEP	alanyl (membrane) aminopeptidase	290	BC004347	Hs.180535
1.6e-06	4.33e-06	4.85	224694_at	ANTXR1	anthrax toxin receptor 1	84168	NM_004862	Hs.459940
< 1e-07	< 1e-07	0.14	201012_at	ANXA1	annexin A1	301	NM_006018	Hs.458425
< 1e-07	< 1e-07	0.045	209369_at	ANXA3	annexin A3	306	NM_006152	Hs.124922
< 1e-07	< 1e-07	0.093	203300_x_at	AP1S2	adaptor-related protein complex 1, sigma 2 subunit	8905	NM_006378	Hs.494406	Axon guidance
< 1e-07	< 1e-07	0.13	230264_s_at	AP1S2	adaptor-related protein complex 1, sigma 2 subunit	8905	Z97832	Hs.15476
< 1e-07	< 1e-07	0.017	230925_at	APBB1IP	amyloid beta (A4) precursor protein-binding, family B, member 1 interacting protein	54518	BC006107	Hs.437126
2e-07	6.63e-07	0.24	217073_x_at	APOA1	apolipoprotein A-I	335	NM_024829	Hs.131933
< 1e-07	< 1e-07	0.061	218218_at	APPL2	adaptor protein, phosphotyrosine interaction, PH domain and leucine zipper containing 2	55198	BF591040	Hs.529984
< 1e-07	< 1e-07	0.01	205568_at	AQP9	aquaporin 9	366	AW135013	Hs.169487
4e-07	1.25e-06	5.21	226197_at	AR	androgen receptor	367	AI188653	Hs.468908
< 1e-07	< 1e-07	0.21	218950_at	ARAP3	ArfGAP with RhoGAP domain, ankyrin repeat and PH domain 3	64411	U73191	Hs.411299	Gastric acid secretion
< 1e-07	< 1e-07	0.22	216266_s_at	ARFGEF1	ADP-ribosylation factor guanine nucleotide-exchange factor 1 (brefeldin A-inhibited)	10565	AI692703	Hs.523899	Protein digestion and absorption
1e-07	3.48e-07	0.06	206177_s_at	ARG1	arginase 1	383	AI916948	Hs.118958	SNARE interactions in vesicular transport
5.59e-05	0.000109	4.48	203946_s_at	ARG2	arginase 2	384	NM_001175	Hs.504877	Caspase Cascade in Apoptosis, D4-GDI Signaling Pathway, FAS signaling pathway ( CD95 ), HIV-I Nef: negative effector of Fas and TNF, TNFR1 Signaling Pathway, Neurotrophin signaling pathway, Vasopressin-regulated water reabsorption
6e-07	1.81e-06	0.22	225166_at	ARHGAP18	Rho GTPase activating protein 18	93663	NM_000647	Hs.511794	Chemokine signaling pathway, Cytokine-cytokine receptor interaction
< 1e-07	< 1e-07	0.045	38149_at	ARHGAP25	Rho GTPase activating protein 25	9938	AA541630	Hs.170019
< 1e-07	< 1e-07	0.05	204882_at	ARHGAP25	Rho GTPase activating protein 25	9938	AB034747	Hs.459940
< 1e-07	< 1e-07	0.047	226576_at	ARHGAP26	Rho GTPase activating protein 26	23092	NM_016293	Hs.14770
< 1e-07	< 1e-07	0.085	205068_s_at	ARHGAP26	Rho GTPase activating protein 26	23092	AW575123	Hs.389374
< 1e-07	< 1e-07	0.029	226219_at	ARHGAP30	Rho GTPase activating protein 30	257106	BF446673	Hs.58877
< 1e-07	< 1e-07	7.99	230047_at	ARHGAP42	Rho GTPase activating protein 42	143872	NM_000358	Hs.369397
4e-07	1.25e-06	5.7	235635_at	ARHGAP5	Rho GTPase activating protein 5	394	NM_002438	Hs.75182	Phagosome
< 1e-07	< 1e-07	0.019	224451_x_at	ARHGAP9	Rho GTPase activating protein 9	64333	NM_003332	Hs.515369	Natural killer cell mediated cytotoxicity, Osteoclast differentiation
< 1e-07	< 1e-07	0.032	232543_x_at	ARHGAP9	Rho GTPase activating protein 9	64333	NM_003264	Hs.519033	Amoebiasis, Chagas disease (American trypanosomiasis), Leishmaniasis, Malaria, Phagosome, Rheumatoid arthritis, Toll-like receptor signaling pathway, Toxoplasmosis
< 1e-07	< 1e-07	0.071	226906_s_at	ARHGAP9	Rho GTPase activating protein 9	64333	NM_005356	Hs.470627	Activation of Csk by cAMP-dependent Protein Kinase Inhibits Signaling through the T Cell Receptor, IL 2 signaling pathway, IL-7 Signal Transduction, Lck and Fyn tyrosine kinases in initiation of TCR Activation, T Cell Receptor Signaling Pathway, The Co-Stimulatory Signal During T-cell Activation, Natural killer cell mediated cytotoxicity, Osteoclast differentiation, Primary immunodeficiency, T ce…
< 1e-07	< 1e-07	0.01	201288_at	ARHGDIB	Rho GDP dissociation inhibitor (GDI) beta	397	M98399	Hs.120949	TSP-1 Induced Apoptosis in Microvascular Endothelial Cell , Adipocytokine signaling pathway, ECM-receptor interaction, Fat digestion and absorption, Hematopoietic cell lineage, Malaria, Phagosome, PPAR signaling pathway
< 1e-07	< 1e-07	0.016	1555812_a_at	ARHGDIB	Rho GDP dissociation inhibitor (GDI) beta	397	AI073984	Hs.137427
< 1e-07	3.48e-07	0.095	210649_s_at	ARID1A	AT rich interactive domain 1A (SWI-like)	8289	AW611685	Hs.372303	B cell receptor signaling pathway, Calcium signaling pathway, Epithelial cell signaling in Helicobacter pylori infection, ErbB signaling pathway, Fc epsilon RI signaling pathway, Fc gamma R-mediated phagocytosis, Glioma, Inositol phosphate metabolism, Leukocyte transendothelial migration, Metabolic pathways, Natural killer cell mediated cytotoxicity, Neurotrophin signaling pathway, Non-small cell…
1e-07	3.48e-07	0.058	202207_at	ARL4C	ADP-ribosylation factor-like 4C	10123	NM_005621	Hs.19413
< 1e-07	< 1e-07	0.12	202206_at	ARL4C	ADP-ribosylation factor-like 4C	10123	BC005047	Hs.298654	Regulation of MAP Kinase Pathways Through Dual Specificity Phosphatases, MAPK signaling pathway
3e-07	9.59e-07	0.25	202208_s_at	ARL4C	ADP-ribosylation factor-like 4C	10123	AW662189	Hs.288010
3e-07	9.59e-07	5	235320_at	ARL6	ADP-ribosylation factor-like 6	84100	AW206817	Hs.567248	Neuroactive ligand-receptor interaction
< 1e-07	< 1e-07	0.15	222912_at	ARRB1	arrestin, beta 1	408	NM_001784	Hs.466039
< 1e-07	< 1e-07	0.16	1555419_a_at	ASAH1	N-acylsphingosine amidohydrolase (acid ceramidase) 1	427	AW872374	Hs.660543	Toll-like receptor signaling pathway
3.4e-06	8.49e-06	0.19	221039_s_at	ASAP1	ArfGAP with SH3 domain, ankyrin repeat and PH domain 1	50807	AF025529	Hs.710507	Osteoclast differentiation
8e-07	2.34e-06	0.25	224790_at	ASAP1	ArfGAP with SH3 domain, ankyrin repeat and PH domain 1	50807	NM_005874	Hs.655652	Osteoclast differentiation
1e-07	3.48e-07	0.2	215684_s_at	ASCC2	activating signal cointegrator 1 complex subunit 2	84164	Y00062	Hs.654514	Activation of Csk by cAMP-dependent Protein Kinase Inhibits Signaling through the T Cell Receptor, B Lymphocyte Cell Surface Molecules, Lck and Fyn tyrosine kinases in initiation of TCR Activation, T Cytotoxic Cell Surface Molecules, T Helper Cell Surface Molecules, Cell adhesion molecules (CAMs), Fc gamma R-mediated phagocytosis, Primary immunodeficiency, T cell receptor signaling pathway
1.93e-05	4.09e-05	4.9	209135_at	ASPH	aspartate beta-hydroxylase	444	BC004270	Hs.497579	Leukocyte transendothelial migration, Non-small cell lung cancer, Pathways in cancer
< 1e-07	< 1e-07	9.23	207076_s_at	ASS1	argininosuccinate synthase 1	445	AF198052	Hs.370503
6.9e-06	1.6e-05	4.24	221652_s_at	ASUN	asunder spermatogenesis regulator	55726	NM_015864	Hs.559459
4e-07	1.25e-06	0.19	218782_s_at	ATAD2	ATPase family, AAA domain containing 2	29028	NM_003830	Hs.310333
1.3e-06	3.6e-06	0.16	225883_at	ATG16L2	autophagy related 16-like 2 (S. cerevisiae)	89849	NM_015515	Hs.9029
5e-07	1.53e-06	0.23	219359_at	ATHL1	ATH1, acid trehalase-like 1 (yeast)	80162	NM_001295	Hs.301921	Selective expression of chemokine receptors during T-cell polarization, Chemokine signaling pathway, Cytokine-cytokine receptor interaction
0.0001442	0.000262	0.21	210858_x_at	ATM	ATM serine/threonine kinase	472	NM_018099	Hs.728955	Peroxisome
1.1e-06	3.1e-06	4.98	209934_s_at	ATP2C1	ATPase, Ca++ transporting, type 2C, member 1	27032	AL022398	Hs.147434
5e-07	1.53e-06	8.02	211137_s_at	ATP2C1	ATPase, Ca++ transporting, type 2C, member 1	27032	NM_014737	Hs.631504
2.4e-06	6.2e-06	8.84	209935_at	ATP2C1	ATPase, Ca++ transporting, type 2C, member 1	27032	NM_018643	Hs.283022
< 1e-07	< 1e-07	0.12	209964_s_at	ATXN7	ataxin 7	6314	NM_000760	Hs.524517	Cytokine-cytokine receptor interaction, Hematopoietic cell lineage, Jak-STAT signaling pathway, Pathways in cancer
3.8e-06	9.37e-06	0.15	225612_s_at	B3GNT5	UDP-GlcNAc:betaGal beta-1,3-N-acetylglucosaminyltransferase 5	84002	AA778552	Hs.195685
2e-07	6.63e-07	4.41	1555963_x_at	B3GNT7	UDP-GlcNAc:betaGal beta-1,3-N-acetylglucosaminyltransferase 7	93010	Z21533	Hs.118651	Maturity onset diabetes of the young
< 1e-07	< 1e-07	0.089	238987_at	B4GALT1	UDP-Gal:betaGlcNAc beta 1,4- galactosyltransferase, polypeptide 1	2683	M88107	Hs.99855	Neuroactive ligand-receptor interaction, Staphylococcus aureus infection
< 1e-07	< 1e-07	0.2	204194_at	BACH1	BTB and CNC homology 1, basic leucine zipper transcription factor 1	571	AI041543	Hs.655668
< 1e-07	< 1e-07	0.18	211475_s_at	BAG1	BCL2-associated athanogene	573	AV756141	Hs.592192	IL 3 signaling pathway, Regulation of BAD phosphorylation, Apoptosis, Cytokine-cytokine receptor interaction, Jak-STAT signaling pathway
< 1e-07	< 1e-07	0.15	219667_s_at	BANK1	B-cell scaffold protein with ankyrin repeats 1	55024	BE675685	Hs.437126
5.6e-06	1.33e-05	0.15	202391_at	BASP1	brain abundant, membrane attached signal protein 1	10409	AI935334	Hs.592804
< 1e-07	< 1e-07	0.2	217985_s_at	BAZ1A	bromodomain adjacent to zinc finger domain, 1A	11177	NM_003387	Hs.128067
3.9e-06	9.59e-06	5.6	223134_at	BBX	bobby sox homolog (Drosophila)	56987	AK000004	Hs.411081	Regulation of actin cytoskeleton
1.6e-06	4.33e-06	0.11	1557257_at	BCL10	B-cell CLL/lymphoma 10	8915	AF089868	Hs.599039
< 1e-07	< 1e-07	0.12	222895_s_at	BCL11B	B-cell CLL/lymphoma 11B (zinc finger protein)	64919	NM_000591	Hs.163867	Amoebiasis, Hematopoietic cell lineage, MAPK signaling pathway, Pathogenic Escherichia coli infection, Phagosome, Regulation of actin cytoskeleton, Toll-like receptor signaling pathway
< 1e-07	< 1e-07	0.19	219528_s_at	BCL11B	B-cell CLL/lymphoma 11B (zinc finger protein)	64919	NM_000129	Hs.335513	Fibrinolysis Pathway, Complement and coagulation cascades
< 1e-07	< 1e-07	0.16	203685_at	BCL2	B-cell CLL/lymphoma 2	596	AI765437	Hs.460857	Ether lipid metabolism, Glycerophospholipid metabolism, Metabolic pathways
< 1e-07	3.48e-07	0.15	215990_s_at	BCL6	B-cell CLL/lymphoma 6	604	BC004490	Hs.25647	B Cell Survival Pathway, BCR Signaling Pathway, Bone Remodelling, Cadmium induces DNA synthesis and proliferation in macrophages, EGF Signaling Pathway, EPO Signaling Pathway, Fc Epsilon Receptor I Signaling in Mast Cells, IGF-1 Signaling Pathway, IL 2 signaling pathway, IL 3 signaling pathway, IL 6 signaling pathway, IL-2 Receptor Beta Chain in T cell Activation, Inhibition of Cellular Prolifera…
4e-06	9.81e-06	6.14	219670_at	BEND5	BEN domain containing 5	79656	AL048542	Hs.16291
9e-07	2.6e-06	6.82	231175_at	BEND6	BEN domain containing 6	221336	NM_005739	Hs.591127	MAPK signaling pathway, T cell receptor signaling pathway
3e-07	9.59e-07	5.7	229963_at	BEX5	brain expressed, X-linked 5	340542	BF439449	Hs.398093
< 1e-07	< 1e-07	11	213429_at	BICC1	BicC family RNA binding protein 1	80114	NM_004267	Hs.8786	Glycosaminoglycan biosynthesis - keratan sulfate
1e-07	3.48e-07	4.79	214806_at	BICD1	bicaudal D homolog 1 (Drosophila)	636	NM_025228	Hs.147434
2e-07	6.63e-07	5.34	231964_at	BICD1	bicaudal D homolog 1 (Drosophila)	636	NM_002160	Hs.143250	ECM-receptor interaction, Focal adhesion
7e-07	2.07e-06	0.21	204493_at	BID	BH3 interacting domain death agonist	637	AF031824	Hs.143212
< 1e-07	< 1e-07	0.24	227143_s_at	BID	BH3 interacting domain death agonist	637	NM_005084	Hs.584823	Ether lipid metabolism, Metabolic pathways
< 1e-07	< 1e-07	0.04	219191_s_at	BIN2	bridging integrator 2	51411	NM_000072	Hs.120949	TSP-1 Induced Apoptosis in Microvascular Endothelial Cell , Adipocytokine signaling pathway, ECM-receptor interaction, Fat digestion and absorption, Hematopoietic cell lineage, Malaria, Phagosome, PPAR signaling pathway
< 1e-07	3.48e-07	5.17	222761_at	BIVM	basic, immunoglobulin-like variable motif containing	54841	AA706818	Hs.119878
3.45e-05	6.99e-05	4.52	206176_at	BMP6	bone morphogenetic protein 6	654	NM_006763	Hs.519162	BTG family proteins and cell cycle regulation, RNA degradation
0.0008482	0.00135	4.15	213578_at	BMPR1A	bone morphogenetic protein receptor, type IA	657	BE671084	Hs.654668
4.6e-06	1.11e-05	4.08	232103_at	BPNT1	3'(2'), 5'-bisphosphate nucleotidase 1	10380	NM_003012	Hs.213424	Wnt signaling pathway
< 1e-07	< 1e-07	0.17	205715_at	BST1	bone marrow stromal cell antigen 1	683	J02923	Hs.381099
0.0001432	0.00026	4.22	241412_at	BTC	betacellulin	685	NM_022718	Hs.654979
2e-07	6.63e-07	0.15	1559975_at	BTG1	B-cell translocation gene 1, anti-proliferative	694	NM_003407	Hs.534052
3e-07	9.59e-07	0.17	200920_s_at	BTG1	B-cell translocation gene 1, anti-proliferative	694	NM_002003	Hs.440898
< 1e-07	< 1e-07	0.063	201236_s_at	BTG2	BTG family, member 2	7832	AW299226	Hs.120949	TSP-1 Induced Apoptosis in Microvascular Endothelial Cell , Adipocytokine signaling pathway, ECM-receptor interaction, Fat digestion and absorption, Hematopoietic cell lineage, Malaria, Phagosome, PPAR signaling pathway
< 1e-07	< 1e-07	0.15	205504_at	BTK	Bruton agammaglobulinemia tyrosine kinase	695	M36118	Hs.348264
0.0007898	0.00126	8.11	209642_at	BUB1	BUB1 mitotic checkpoint serine/threonine kinase	699	N36839	Hs.309288
1e-06	2.86e-06	0.13	209183_s_at	C10orf10	chromosome 10 open reading frame 10	11067	NM_005565	Hs.304475	Fc epsilon RI signaling pathway, Natural killer cell mediated cytotoxicity, Osteoclast differentiation, T cell receptor signaling pathway
< 1e-07	< 1e-07	0.076	225372_at	C10orf54	chromosome 10 open reading frame 54	64115	AI337369	Hs.107812
< 1e-07	< 1e-07	0.085	225373_at	C10orf54	chromosome 10 open reading frame 54	64115	M31933	Hs.654395	B Lymphocyte Cell Surface Molecules, B cell receptor signaling pathway, Fc gamma R-mediated phagocytosis, Osteoclast differentiation, Phagosome, Staphylococcus aureus infection, Systemic lupus erythematosus
< 1e-07	< 1e-07	0.19	1568954_s_at	C16orf72	chromosome 16 open reading frame 72	29035	BC003143	Hs.298654	Regulation of MAP Kinase Pathways Through Dual Specificity Phosphatases, MAPK signaling pathway
< 1e-07	< 1e-07	0.017	228532_at	C1orf162	chromosome 1 open reading frame 162	128346	AL559122	Hs.382212
< 1e-07	< 1e-07	0.028	218232_at	C1QA	complement component 1, q subcomponent, A chain	712	AI925518	Hs.217484
2.74e-05	5.64e-05	0.19	1555229_a_at	C1S	complement component 1, s subcomponent	716	S59049	Hs.75256
< 1e-07	< 1e-07	0.088	209906_at	C3AR1	complement component 3a receptor 1	719	AW130536	Hs.647105
4e-07	1.25e-06	6.35	239697_x_at	C3orf67	chromosome 3 open reading frame 67	200844	AI005043	Hs.128067
< 1e-07	< 1e-07	0.0058	220088_at	C5AR1	complement component 5a receptor 1	728	NM_023914	Hs.546396	Neuroactive ligand-receptor interaction
0.0005086	0.000834	4.73	224875_at	C5orf24	chromosome 5 open reading frame 24	134553	AL161725	Hs.132599
4.24e-05	8.46e-05	4.19	238028_at	C6orf132	chromosome 6 open reading frame 132	647024	AW025572	Hs.710500
< 1e-07	< 1e-07	8.36	241455_at	C6orf132	chromosome 6 open reading frame 132	647024	NM_002371	Hs.80395	Role of MAL in Rho-Mediated Activation of SRF
1.3e-06	3.6e-06	0.16	1553133_at	C9orf72	chromosome 9 open reading frame 72	203228	AI436587	Hs.111377	Neuroactive ligand-receptor interaction
2e-06	5.25e-06	0.19	225919_s_at	C9orf72	chromosome 9 open reading frame 72	203228	AL161725	Hs.132599
0.0001167	0.000216	0.092	205950_s_at	CA1	carbonic anhydrase I	759	M15564	Hs.382212
< 1e-07	< 1e-07	0.11	209301_at	CA2	carbonic anhydrase II	760	NM_000361	Hs.2030	Complement and coagulation cascades
0.000142	0.000258	4.08	206209_s_at	CA4	carbonic anhydrase IV	762	AK024855	Hs.181301	Antigen processing and presentation, Lysosome, Phagosome
2e-07	6.63e-07	0.18	239106_at	CA5BP1	carbonic anhydrase VB pseudogene 1	340591	M24915	Hs.502328	Adhesion Molecules on Lymphocyte, Monocyte and its Surface Molecules, Neutrophil and Its Surface Molecules, ECM-receptor interaction, Hematopoietic cell lineage, Shigellosis
< 1e-07	< 1e-07	0.17	224311_s_at	CAB39	calcium binding protein 39	51719	AF012536	Hs.655801	Apoptosis, Cytokine-cytokine receptor interaction, Natural killer cell mediated cytotoxicity
4.2e-06	1.03e-05	6.41	225627_s_at	CACHD1	cache domain containing 1	57685	BF514079	Hs.376206
< 1e-07	< 1e-07	15.14	227623_at	CACNA2D1	calcium channel, voltage-dependent, alpha 2/delta subunit 1	781	X51757	Hs.654614	Antigen processing and presentation, Endocytosis, MAPK signaling pathway, Protein processing in endoplasmic reticulum, Spliceosome, Toxoplasmosis
9.9e-05	0.000185	4.58	209031_at	CADM1	cell adhesion molecule 1	23705	AV728268	Hs.368592
< 1e-07	< 1e-07	0.21	221879_at	CALML4	calmodulin-like 4	91860	BG105700	Hs.645288
< 1e-07	< 1e-07	0.22	64408_s_at	CALML4	calmodulin-like 4	91860	NM_004877	Hs.5210
< 1e-07	< 1e-07	0.12	214315_x_at	CALR	calreticulin	811	AA284532	Hs.493819
4.2e-06	1.03e-05	4.11	213268_at	CAMTA1	calmodulin binding transcription activator 1	23261	BC000715	Hs.236516
< 1e-07	3.48e-07	4.92	212554_at	CAP2	CAP, adenylate cyclase-associated protein, 2 (yeast)	10486	BG236366	Hs.278901	Acute myeloid leukemia, Aldosterone-regulated sodium reabsorption, Amoebiasis, Apoptosis, B cell receptor signaling pathway, Bacterial invasion of epithelial cells, Carbohydrate digestion and absorption, Chagas disease (American trypanosomiasis), Chemokine signaling pathway, Chronic myeloid leukemia, Colorectal cancer, Endometrial cancer, ErbB signaling pathway, Fc epsilon RI signaling pathway, F…
5e-07	1.53e-06	5.06	212551_at	CAP2	CAP, adenylate cyclase-associated protein, 2 (yeast)	10486	NM_022349	Hs.523702
2.59e-05	5.35e-05	0.24	201850_at	CAPG	capping protein (actin filament), gelsolin-like	822	AA650281	Hs.521008
0.0002615	0.000453	0.23	1569450_at	CAPZA2	capping protein (actin filament) muscle Z-line, alpha 2	830	AA806283	Hs.518900
0.0001124	0.000208	0.22	201950_x_at	CAPZB	capping protein (actin filament) muscle Z-line, beta	832	AK023546	Hs.741267
< 1e-07	< 1e-07	12.81	210026_s_at	CARD10	caspase recruitment domain family, member 10	29775	AI659418	Hs.493867
< 1e-07	< 1e-07	0.048	1552701_a_at	CARD16	caspase recruitment domain family, member 16	114769	NM_022107	Hs.520046
1e-07	3.48e-07	0.23	242521_at	CARD8-AS1	CARD8 antisense RNA 1	100505812	AK026714	Hs.7886
< 1e-07	< 1e-07	0.011	211368_s_at	CASP1	caspase 1, apoptosis-related cysteine peptidase	834	NM_004994	Hs.297413	Inhibition of Matrix Metalloproteinases, Bladder cancer, Leukocyte transendothelial migration, Pathways in cancer
< 1e-07	< 1e-07	0.02	209970_x_at	CASP1	caspase 1, apoptosis-related cysteine peptidase	834	M83248	Hs.313	Regulators of Bone Mineralization, ECM-receptor interaction, Focal adhesion, Toll-like receptor signaling pathway
< 1e-07	< 1e-07	0.026	211366_x_at	CASP1	caspase 1, apoptosis-related cysteine peptidase	834	H16791	Hs.728955	Peroxisome
< 1e-07	< 1e-07	0.027	206011_at	CASP1	caspase 1, apoptosis-related cysteine peptidase	834	U13698	Hs.2490	Caspase Cascade in Apoptosis, D4-GDI Signaling Pathway, IL 18 Signaling Pathway, Amyotrophic lateral sclerosis (ALS), Cytosolic DNA-sensing pathway, NOD-like receptor signaling pathway
< 1e-07	< 1e-07	0.033	211367_s_at	CASP1	caspase 1, apoptosis-related cysteine peptidase	834	AL574194	Hs.655332
< 1e-07	< 1e-07	0.14	207500_at	CASP5	caspase 5, apoptosis-related cysteine peptidase	838	U69546	Hs.309288
1.2e-06	3.35e-06	0.22	211922_s_at	CAT	catalase	847	AF200738	Hs.504657
< 1e-07	< 1e-07	4.65	231862_at	CBX5	chromobox homolog 5	23468	NM_014214	Hs.743311	Inositol phosphate metabolism, Metabolic pathways, Phosphatidylinositol signaling system
8e-07	2.34e-06	5.86	226085_at	CBX5	chromobox homolog 5	23468	NM_001109	Hs.501574
3.4e-06	8.49e-06	4.5	226287_at	CCDC34	coiled-coil domain containing 34	91057	AF237908	Hs.523702
< 1e-07	< 1e-07	10.31	225242_s_at	CCDC80	coiled-coil domain containing 80	151887	NM_001562	Hs.83077	Cytokine Network, IL 18 Signaling Pathway, IL12 and Stat4 Dependent Signaling Pathway in Th1 Development, Ras-Independent pathway in NK cell-mediated cytotoxicity, Th1/Th2 Differentiation, African trypanosomiasis, Cytokine-cytokine receptor interaction, Cytosolic DNA-sensing pathway, Malaria, NOD-like receptor signaling pathway, Rheumatoid arthritis
0.0002721	0.00047	0.19	235228_at	CCDC85A	coiled-coil domain containing 85A	114800	X06557	Hs.74647
< 1e-07	< 1e-07	0.24	227228_s_at	CCDC88C	coiled-coil domain containing 88C	440193	AL562860	Hs.201858
2.4e-06	6.2e-06	0.059	216598_s_at	CCL2	chemokine (C-C motif) ligand 2	6347	AW071793	Hs.468908
< 1e-07	< 1e-07	0.075	204103_at	CCL4	chemokine (C-C motif) ligand 4	6351	NM_006748	Hs.75367
< 1e-07	< 1e-07	0.017	1405_i_at	CCL5	chemokine (C-C motif) ligand 5	6352	NM_138957	Hs.431850	Agrin in Postsynaptic Differentiation, Angiotensin II mediated activation of JNK Pathway via Pyk2 dependent signaling, Aspirin Blocks Signaling Pathway Involved in Platelet Activation, Bioactive Peptide Induced Signaling Pathway, Cadmium induces DNA synthesis and proliferation in macrophages, CCR3 signaling in Eosinophils, Ceramide Signaling Pathway, CXCR4 Signaling Pathway, Erk and PI-3 Kinase A…
< 1e-07	< 1e-07	0.034	204655_at	CCL5	chemokine (C-C motif) ligand 5	6352	U34690	Hs.415067	Phagosome
0.0004176	0.000697	0.22	1555759_a_at	CCL5	chemokine (C-C motif) ligand 5	6352	BF213829	Hs.76364
8.2e-06	1.86e-05	0.22	211559_s_at	CCNG2	cyclin G2	901	NM_018579	Hs.596025
< 1e-07	< 1e-07	0.05	1555411_a_at	CCNL1	cyclin L1	57018	AW241742	Hs.518727
< 1e-07	< 1e-07	0.077	1555827_at	CCNL1	cyclin L1	57018	AF280095	Hs.145150
< 1e-07	< 1e-07	0.15	220046_s_at	CCNL1	cyclin L1	57018	NM_012249	Hs.709193	Insulin signaling pathway
< 1e-07	< 1e-07	0.01	205098_at	CCR1	chemokine (C-C motif) receptor 1	1230	AF400600	Hs.143929	Phagosome
< 1e-07	< 1e-07	0.027	205099_s_at	CCR1	chemokine (C-C motif) receptor 1	1230	AF239764	Hs.658712
< 1e-07	< 1e-07	0.045	206978_at	CCR2	chemokine (C-C motif) receptor 2	729230	NM_003730	Hs.529989
< 1e-07	< 1e-07	0.18	206991_s_at	CCR5	chemokine (C-C motif) receptor 5 (gene/pseudogene)	1234	NM_023003	Hs.513094
< 1e-07	< 1e-07	0.0078	201743_at	CD14	CD14 molecule	929	BC006454	Hs.462214
< 1e-07	< 1e-07	0.0067	203645_s_at	CD163	CD163 molecule	9332	BF433657	Hs.709539
< 1e-07	< 1e-07	0.0073	215049_x_at	CD163	CD163 molecule	9332	NM_002341	Hs.376208	Cytokine-cytokine receptor interaction, Rheumatoid arthritis
1.02e-05	2.26e-05	0.23	205987_at	CD1C	CD1c molecule	911	NM_025189	Hs.729202
< 1e-07	< 1e-07	0.11	205831_at	CD2	CD2 molecule	914	BF438116	Hs.298658
< 1e-07	< 1e-07	0.034	209933_s_at	CD300A	CD300a molecule	11314	AU157224	Hs.432706
< 1e-07	< 1e-07	0.057	217078_s_at	CD300A	CD300a molecule	11314	NM_007161	Hs.436066
< 1e-07	< 1e-07	0.074	1553043_a_at	CD300LF	CD300 molecule-like family member f	146722	AC003999	Hs.200770
< 1e-07	< 1e-07	0.16	206120_at	CD33	CD33 molecule	945	AI052659	Hs.334019	B Lymphocyte Cell Surface Molecules, Complement and coagulation cascades, Hematopoietic cell lineage, Leishmaniasis, Malaria
< 1e-07	< 1e-07	0.033	209555_s_at	CD36	CD36 molecule (thrombospondin receptor)	948	AW576600	Hs.529984
< 1e-07	< 1e-07	0.054	206488_s_at	CD36	CD36 molecule (thrombospondin receptor)	948	BC003143	Hs.298654	Regulation of MAP Kinase Pathways Through Dual Specificity Phosphatases, MAPK signaling pathway
< 1e-07	< 1e-07	0.054	228766_at	CD36	CD36 molecule (thrombospondin receptor)	948	D13720	Hs.558348	The Co-Stimulatory Signal During T-cell Activation, Chemokine signaling pathway, Leukocyte transendothelial migration, T cell receptor signaling pathway
< 1e-07	< 1e-07	0.14	213539_at	CD3D	CD3d molecule, delta (CD3-TCR complex)	915	NM_015474	Hs.580681
0.0002317	0.000406	0.22	203547_at	CD4	CD4 molecule	920	AV711904	Hs.524579	Salivary secretion
< 1e-07	< 1e-07	0.059	217523_at	CD44	CD44 molecule (Indian blood group)	960	NM_139018	Hs.567706
3e-07	9.59e-07	0.067	212063_at	CD44	CD44 molecule (Indian blood group)	960	AF299327	Hs.76364
< 1e-07	< 1e-07	0.068	209835_x_at	CD44	CD44 molecule (Indian blood group)	960	NM_001066	Hs.256278	Acetylation and Deacetylation of RelA in The Nucleus, Chaperones modulate interferon Signaling Pathway, HIV-I Nef: negative effector of Fas and TNF, Keratinocyte Differentiation, NF-kB Signaling Pathway, Regulation of transcriptional activity by PML, SODD/TNFR1 Signaling Pathway, TNFR2 Signaling Pathway, Adipocytokine signaling pathway, Amyotrophic lateral sclerosis (ALS), Cytokine-cytokine recep…
< 1e-07	< 1e-07	0.071	204490_s_at	CD44	CD44 molecule (Indian blood group)	960	NM_002065	Hs.132016	Alanine, aspartate and glutamate metabolism, Arginine and proline metabolism, Metabolic pathways, Nitrogen metabolism
< 1e-07	< 1e-07	0.074	212014_x_at	CD44	CD44 molecule (Indian blood group)	960	AY151286	Hs.196384	Eicosanoid Metabolism, Mechanism of Acetaminophen Activity and Toxicity, Mechanism of Gene Regulation by Peroxisome Proliferators via PPARa(alpha), Arachidonic acid metabolism, Leishmaniasis, Metabolic pathways, Pathways in cancer, Small cell lung cancer, VEGF signaling pathway
< 1e-07	< 1e-07	0.15	1557905_s_at	CD44	CD44 molecule (Indian blood group)	960	U93091	Hs.174312	Amoebiasis, Chagas disease (American trypanosomiasis), Leishmaniasis, Malaria, Pathogenic Escherichia coli infection, Phagosome, Rheumatoid arthritis, Toll-like receptor signaling pathway, Toxoplasmosis
2e-07	6.63e-07	0.15	204489_s_at	CD44	CD44 molecule (Indian blood group)	960	BC005926	Hs.5509
7.9e-06	1.8e-05	0.23	229221_at	CD44	CD44 molecule (Indian blood group)	960	AW469546	Hs.535845
< 1e-07	< 1e-07	0.17	211574_s_at	CD46	CD46 molecule, complement regulatory protein	4179	AW026543	Hs.445466	Neuroactive ligand-receptor interaction, Staphylococcus aureus infection
4e-07	1.25e-06	0.17	207549_x_at	CD46	CD46 molecule, complement regulatory protein	4179	NM_022481	Hs.726187	Endocytosis
< 1e-07	< 1e-07	0.037	204118_at	CD48	CD48 molecule	962	AA918317	Hs.709690
5e-07	1.53e-06	0.029	34210_at	CD52	CD52 molecule	1043	BC004564	Hs.720849
0.0001566	0.000282	0.13	204661_at	CD52	CD52 molecule	1043	NM_000963	Hs.196384	Eicosanoid Metabolism, Mechanism of Acetaminophen Activity and Toxicity, Mechanism of Gene Regulation by Peroxisome Proliferators via PPARa(alpha), Arachidonic acid metabolism, Leishmaniasis, Metabolic pathways, Pathways in cancer, Small cell lung cancer, VEGF signaling pathway
< 1e-07	< 1e-07	0.0097	203416_at	CD53	CD53 molecule	963	AI735692	Hs.436066
< 1e-07	< 1e-07	0.091	242946_at	CD53	CD53 molecule	963	BC003064	Hs.696631	Endocytosis
< 1e-07	< 1e-07	0.075	209619_at	CD74	CD74 molecule, major histocompatibility complex, class II invariant chain	972	AF020314	Hs.9688
0.0003542	0.000599	0.15	1567628_at	CD74	CD74 molecule, major histocompatibility complex, class II invariant chain	972	AA150186	Hs.436271	B cell receptor signaling pathway
< 1e-07	< 1e-07	0.052	230391_at	CD84	CD84 molecule	8832	AI377324	Hs.601766
5.1e-06	1.22e-05	0.23	205988_at	CD84	CD84 molecule	8832	AA744636	Hs.432706
< 1e-07	< 1e-07	0.16	205758_at	CD8A	CD8a molecule	925	NM_153701	Hs.567294	IL12 and Stat4 Dependent Signaling Pathway in Th1 Development, NO2-dependent IL 12 Pathway in NK cells, Selective expression of chemokine receptors during T-cell polarization, Th1/Th2 Differentiation, Cytokine-cytokine receptor interaction, Jak-STAT signaling pathway
< 1e-07	< 1e-07	0.015	202878_s_at	CD93	CD93 molecule	22918	AI631833	Hs.318547	Adherens junction
< 1e-07	3.48e-07	0.22	202877_s_at	CD93	CD93 molecule	22918	AW467357	Hs.371720	Aspirin Blocks Signaling Pathway Involved in Platelet Activation, BCR Signaling Pathway, Fc Epsilon Receptor I Signaling in Mast Cells, IL 2 signaling pathway, IL-2 Receptor Beta Chain in T cell Activation, Ras-Independent pathway in NK cell-mediated cytotoxicity, B cell receptor signaling pathway, Fc epsilon RI signaling pathway, Fc gamma R-mediated phagocytosis, Natural killer cell mediated cyt…
3.8e-06	9.37e-06	0.2	201028_s_at	CD99	CD99 molecule	4267	L01639	Hs.593413	CXCR4 Signaling Pathway, HIV-1 defeats host-mediated resistance by CEM15, Pertussis toxin-insensitive CCR5 Signaling in Macrophage, Selective expression of chemokine receptors during T-cell polarization, Axon guidance, Chemokine signaling pathway, Cytokine-cytokine receptor interaction, Endocytosis, Intestinal immune network for IgA production, Leukocyte transendothelial migration
< 1e-07	< 1e-07	0.12	205627_at	CDA	cytidine deaminase	978	AK026424	Hs.187772	Chemokine signaling pathway
1e-07	3.48e-07	11.32	214464_at	CDC42BPA	CDC42 binding protein kinase alpha (DMPK-like)	8476	AI688812	Hs.99491	Chemokine signaling pathway, MAPK signaling pathway
3e-07	9.59e-07	0.12	209286_at	CDC42EP3	CDC42 effector protein (Rho GTPase binding) 3	10602	AI810244	Hs.488173
< 1e-07	< 1e-07	0.19	1552613_s_at	CDC42SE2	CDC42 small effector 2	56990	AI806984	Hs.654583	Degradation of the RAR and RXR by the proteasome, Map Kinase Inactivation of SMRT Corepressor, Nuclear receptors coordinate the activities of chromatin remodeling complexes and coactivators to facilitate initiation of transcription in carcinoma cells, Nuclear Receptors in Lipid Metabolism and Toxicity, Regulation of transcriptional activity by PML, Transcription Regulation by Methyltransferase of…
< 1e-07	< 1e-07	0.2	1552612_at	CDC42SE2	CDC42 small effector 2	56990	D55639	Hs.470126	Metabolic pathways, Tryptophan metabolism
1.02e-05	2.26e-05	4.35	207172_s_at	CDH11	cadherin 11, type 2, OB-cadherin (osteoblast)	1009	NM_005873	Hs.422336
3e-07	9.59e-07	8.42	207173_x_at	CDH11	cadherin 11, type 2, OB-cadherin (osteoblast)	1009	AL572407	Hs.460002
< 1e-07	< 1e-07	8.57	239286_at	CDH11	cadherin 11, type 2, OB-cadherin (osteoblast)	1009	NM_001778	Hs.243564	Natural killer cell mediated cytotoxicity
< 1e-07	< 1e-07	10.41	236179_at	CDH11	cadherin 11, type 2, OB-cadherin (osteoblast)	1009	BE620915	Hs.85155
0.0003252	0.000553	5.44	203213_at	CDK1	cyclin-dependent kinase 1	983	NM_013385	Hs.170944	ADP-Ribosylation Factor
3.9e-06	9.59e-06	0.24	203252_at	CDK2AP2	cyclin-dependent kinase 2 associated protein 2	10263	AI733027	Hs.422688
1.3e-06	3.6e-06	4.15	233540_s_at	CDK5RAP2	CDK5 regulatory subunit associated protein 2	55755	U13699	Hs.2490	Caspase Cascade in Apoptosis, D4-GDI Signaling Pathway, IL 18 Signaling Pathway, Amyotrophic lateral sclerosis (ALS), Cytosolic DNA-sensing pathway, NOD-like receptor signaling pathway
3e-07	9.59e-07	4.27	204831_at	CDK8	cyclin-dependent kinase 8	1024	NM_017791	Hs.509966
< 1e-07	< 1e-07	8.54	236313_at	CDKN2B	cyclin-dependent kinase inhibitor 2B (p15, inhibits CDK4)	1030	NM_000399	Hs.1395	Neuropeptides VIP and PACAP inhibit the apoptosis of activated T cells
8e-07	2.34e-06	0.22	213548_s_at	CDV3	CDV3 homolog (mouse)	55573	BE671663	Hs.592102
2e-07	6.63e-07	0.22	212501_at	CEBPB	CCAAT/enhancer binding protein (C/EBP), beta	1051	AA131041	Hs.437609
< 1e-07	< 1e-07	0.086	213006_at	CEBPD	CCAAT/enhancer binding protein (C/EBP), delta	1052	NM_006113	Hs.267659	B cell receptor signaling pathway, Chemokine signaling pathway, Fc epsilon RI signaling pathway, Fc gamma R-mediated phagocytosis, Focal adhesion, Leukocyte transendothelial migration, Natural killer cell mediated cytotoxicity, Regulation of actin cytoskeleton, T cell receptor signaling pathway
< 1e-07	< 1e-07	0.11	203973_s_at	CEBPD	CCAAT/enhancer binding protein (C/EBP), delta	1052	AF070587	Hs.525536
< 1e-07	< 1e-07	0.031	242268_at	CELF2	CUGBP, Elav-like family member 2	10659	AB051833	Hs.123239
< 1e-07	< 1e-07	0.035	202157_s_at	CELF2	CUGBP, Elav-like family member 2	10659	NM_016270	Hs.744182
< 1e-07	< 1e-07	0.1	202156_s_at	CELF2	CUGBP, Elav-like family member 2	10659	NM_000061	Hs.159494	BCR Signaling Pathway, Fc Epsilon Receptor I Signaling in Mast Cells, Phosphoinositides and their downstream targets., B cell receptor signaling pathway, Fc epsilon RI signaling pathway, Osteoclast differentiation, Primary immunodeficiency
< 1e-07	< 1e-07	0.14	202158_s_at	CELF2	CUGBP, Elav-like family member 2	10659	BC002796	Hs.46446
< 1e-07	< 1e-07	0.21	227178_at	CELF2	CUGBP, Elav-like family member 2	10659	NM_003730	Hs.529989
1.2e-06	3.35e-06	4.65	230497_at	CELF5	CUGBP, Elav-like family member 5	60680	R62907	Hs.696631	Endocytosis
1.09e-05	2.41e-05	4.7	212942_s_at	CEMIP	cell migration inducing protein, hyaluronan binding	57214	NM_030781	Hs.464422	Phagosome
< 1e-07	< 1e-07	4.51	226610_at	CENPV	centromere protein V	201161	NM_007199	Hs.369265	Signal transduction through IL1R, Apoptosis, Neurotrophin signaling pathway
< 1e-07	< 1e-07	4.92	225485_at	CEP41	centrosomal protein 41kDa	95681	AL548053	Hs.437126
1.8e-06	4.8e-06	4.32	239282_at	CEP83	centrosomal protein 83kDa	51134	NM_022898	Hs.709690
2e-06	5.25e-06	6.73	219644_at	CEP83	centrosomal protein 83kDa	51134	U94592	Hs.80658
5e-07	1.53e-06	5.59	209662_at	CETN3	centrin, EF-hand protein, 3	1070	BG251556	Hs.101150
< 1e-07	< 1e-07	0.054	205382_s_at	CFD	complement factor D (adipsin)	1675	N49935	Hs.522895
1e-07	3.48e-07	4.51	203854_at	CFI	complement factor I	3426	BE157991	Hs.309288
0.0002042	0.000361	0.097	1555730_a_at	CFL1	cofilin 1 (non-muscle)	1072	BF514552	Hs.292449
< 1e-07	< 1e-07	0.064	211317_s_at	CFLAR	CASP8 and FADD-like apoptosis regulator	8837	AW025579	Hs.100261
< 1e-07	< 1e-07	0.12	208485_x_at	CFLAR	CASP8 and FADD-like apoptosis regulator	8837	NM_001995	Hs.406678	Adipocytokine signaling pathway, Fatty acid metabolism, Metabolic pathways, Peroxisome, PPAR signaling pathway
< 1e-07	< 1e-07	0.12	211862_x_at	CFLAR	CASP8 and FADD-like apoptosis regulator	8837	NM_000509	Hs.727584	Acute Myocardial Infarction, Extrinsic Prothrombin Activation Pathway, Fibrinolysis Pathway, Intrinsic Prothrombin Activation Pathway, Complement and coagulation cascades, Staphylococcus aureus infection
< 1e-07	< 1e-07	0.17	209508_x_at	CFLAR	CASP8 and FADD-like apoptosis regulator	8837	AF039686	Hs.495989
< 1e-07	< 1e-07	0.17	214486_x_at	CFLAR	CASP8 and FADD-like apoptosis regulator	8837	NM_018404	Hs.514063
< 1e-07	< 1e-07	0.21	211316_x_at	CFLAR	CASP8 and FADD-like apoptosis regulator	8837	U70451	Hs.82116	Inactivation of Gsk3 by AKT causes accumulation of b-catenin in Alveolar Macrophages, NFkB activation by Nontypeable Hemophilus influenzae, NF-kB Signaling Pathway, Signal transduction through IL1R, Toll-Like Receptor Pathway, African trypanosomiasis, Apoptosis, Chagas disease (American trypanosomiasis), Leishmaniasis, Malaria, Toll-like receptor signaling pathway, Toxoplasmosis
5.9e-06	1.39e-05	0.24	210564_x_at	CFLAR	CASP8 and FADD-like apoptosis regulator	8837	NM_019018	Hs.155085
< 1e-07	< 1e-07	0.092	206380_s_at	CFP	complement factor properdin	5199	AB015718	Hs.744005
< 1e-07	< 1e-07	4.12	201182_s_at	CHD4	chromodomain helicase DNA binding protein 4	1108	U81501	Hs.99855	Neuroactive ligand-receptor interaction, Staphylococcus aureus infection
0.0001041	0.000194	4.17	229586_at	CHD9	chromodomain helicase DNA binding protein 9	80205	AW070431	Hs.551713
2e-07	6.63e-07	0.25	209395_at	CHI3L1	chitinase 3-like 1 (cartilage glycoprotein-39)	1116	AF280094	Hs.145150
1.1e-06	3.1e-06	0.18	219492_at	CHIC2	cysteine-rich hydrophobic domain 2	26511	AI341146	Hs.416375
2e-07	6.63e-07	8.88	204591_at	CHL1	cell adhesion molecule L1-like	10752	AI744658	Hs.744916	Pancreatic secretion
1.7e-06	4.57e-06	0.2	225119_at	CHMP4B	charged multivesicular body protein 4B	128866	NM_015986	Hs.649372
0.0004693	0.000774	4.88	212624_s_at	CHN1	chimerin 1	1123	BC006456	Hs.365286
< 1e-07	< 1e-07	0.16	1557733_a_at	CHRM3-AS2	CHRM3 antisense RNA 2	100506915	NM_002162	Hs.654563	Cell adhesion molecules (CAMs)
2e-07	6.63e-07	8.84	226368_at	CHST11	carbohydrate (chondroitin 4) sulfotransferase 11	50515	AF177765	Hs.174312	Amoebiasis, Chagas disease (American trypanosomiasis), Leishmaniasis, Malaria, Pathogenic Escherichia coli infection, Phagosome, Rheumatoid arthritis, Toll-like receptor signaling pathway, Toxoplasmosis
< 1e-07	3.48e-07	0.062	203066_at	CHST15	carbohydrate (N-acetylgalactosamine 4-sulfate 6-O) sulfotransferase 15	51363	BC015390	Hs.515383
< 1e-07	< 1e-07	0.14	203921_at	CHST2	carbohydrate (N-acetylglucosamine-6-O) sulfotransferase 2	9435	AF348491	Hs.593413	CXCR4 Signaling Pathway, HIV-1 defeats host-mediated resistance by CEM15, Pertussis toxin-insensitive CCR5 Signaling in Macrophage, Selective expression of chemokine receptors during T-cell polarization, Axon guidance, Chemokine signaling pathway, Cytokine-cytokine receptor interaction, Endocytosis, Intestinal immune network for IgA production, Leukocyte transendothelial migration
5.4e-06	1.29e-05	5.99	236378_at	CIB4	calcium and integrin binding family member 4	130106	NM_017415	Hs.655084
< 1e-07	< 1e-07	0.096	207144_s_at	CITED1	Cbp/p300-interacting transactivator, with Glu/Asp-rich carboxy-terminal domain, 1	4435	BG200452	Hs.480400
2e-07	6.63e-07	0.072	207980_s_at	CITED2	Cbp/p300-interacting transactivator, with Glu/Asp-rich carboxy-terminal domain, 2	10370	M13975	Hs.460355	Activation of PKC through G protein coupled receptor, Activation of Src by Protein-tyrosine phosphatase alpha, Angiotensin II mediated activation of JNK Pathway via Pyk2 dependent signaling, Apoptotic Signaling in Response to DNA Damage, Aspirin Blocks Signaling Pathway Involved in Platelet Activation, Attenuation of GPCR Signaling, BCR Signaling Pathway, Bioactive Peptide Induced Signaling Pathw…
< 1e-07	3.48e-07	4.91	200999_s_at	CKAP4	cytoskeleton-associated protein 4	10970	AW166711	Hs.146100
4.3e-06	1.05e-05	4.57	201734_at	CLCN3	chloride channel, voltage-sensitive 3	1182	AA809640	Hs.483423
< 1e-07	< 1e-07	6.17	201732_s_at	CLCN3	chloride channel, voltage-sensitive 3	1182	BG250585	Hs.591248
1e-07	3.48e-07	6.37	201733_at	CLCN3	chloride channel, voltage-sensitive 3	1182	NM_004079	Hs.181301	Antigen processing and presentation, Lysosome, Phagosome
< 1e-07	< 1e-07	0.12	209732_at	CLEC2B	C-type lectin domain family 2, member B	9976	R64130	Hs.2164	Chemokine signaling pathway, Cytokine-cytokine receptor interaction
6e-07	1.81e-06	0.23	1556209_at	CLEC2B	C-type lectin domain family 2, member B	9976	BM823647	Hs.721548
< 1e-07	< 1e-07	0.055	219947_at	CLEC4A	C-type lectin domain family 4, member A	50856	AI375915	Hs.731555
< 1e-07	< 1e-07	0.13	221724_s_at	CLEC4A	C-type lectin domain family 4, member A	50856	AF000424	Hs.436066
< 1e-07	< 1e-07	0.084	222934_s_at	CLEC4E	C-type lectin domain family 4, member E	26253	U49396	Hs.731607	Calcium signaling pathway, Neuroactive ligand-receptor interaction
< 1e-07	< 1e-07	0.01	221698_s_at	CLEC7A	C-type lectin domain family 7, member A	64581	U19713	Hs.76364
< 1e-07	< 1e-07	0.012	1555756_a_at	CLEC7A	C-type lectin domain family 7, member A	64581	AB040942	Hs.525536
< 1e-07	< 1e-07	0.1	1554406_a_at	CLEC7A	C-type lectin domain family 7, member A	64581	AW303375	Hs.477128
< 1e-07	3.48e-07	0.17	213415_at	CLIC2	chloride intracellular channel 2	1193	AA001400	Hs.40735	Basal cell carcinoma, Melanogenesis, Pathways in cancer, Wnt signaling pathway
< 1e-07	< 1e-07	7.78	226834_at	CLMP	CXADR-like membrane protein	79827	AF009634	Hs.631592	B cell receptor signaling pathway, Osteoclast differentiation
1.62e-05	3.48e-05	0.2	211136_s_at	CLPTM1	cleft lip and palate associated transmembrane protein 1	1209	AW003459	Hs.745059
5.9e-06	1.39e-05	5.12	1560434_x_at	CLTA	clathrin, light chain A	1211	NM_005615	Hs.23262
< 1e-07	< 1e-07	0.13	226702_at	CMPK2	cytidine monophosphate (UMP-CMP) kinase 2, mitochondrial	129607	AK026426	Hs.152292
< 1e-07	< 1e-07	0.048	229967_at	CMTM2	CKLF-like MARVEL transmembrane domain containing 2	146225	N66571	Hs.501898	Vascular smooth muscle contraction
3e-07	9.59e-07	4.12	225553_at	CNIH1	cornichon family AMPA receptor auxiliary protein 1	10175	BE675800	Hs.590886	Basic mechanism of action of PPARa, PPARb(d) and PPARg and effects on gene expression, Control of Gene Expression by Vitamin D Receptor, Degradation of the RAR and RXR by the proteasome, FXR and LXR Regulation of Cholesterol Metabolism, Map Kinase Inactivation of SMRT Corepressor, Mechanism of Gene Regulation by Peroxisome Proliferators via PPARa(alpha), Nuclear receptors coordinate the activitie…
1.64e-05	3.52e-05	0.17	222721_at	CNIH4	cornichon family AMPA receptor auxiliary protein 4	29097	AL050069	Hs.473133
1e-07	3.48e-07	0.23	1556389_at	CNPY3	canopy FGF signaling regulator 3	10695	AW007573	Hs.507515
0.0004206	0.000702	4.52	205941_s_at	COL10A1	collagen, type X, alpha 1	1300	NM_000878	Hs.474787	IL 2 signaling pathway, IL-2 Receptor Beta Chain in T cell Activation, Cytokine-cytokine receptor interaction, Endocytosis, Jak-STAT signaling pathway
1.69e-05	3.61e-05	13.84	217428_s_at	COL10A1	collagen, type X, alpha 1	1300	M77227	Hs.396530	Signaling of Hepatocyte Growth Factor Receptor, Cytokine-cytokine receptor interaction, Focal adhesion, Malaria, Melanoma, Pathways in cancer, Renal cell carcinoma
2e-07	6.63e-07	13.43	211343_s_at	COL13A1	collagen, type XIII, alpha 1	1305	R14890	Hs.191841
0.0002181	0.000384	0.2	203477_at	COL15A1	collagen, type XV, alpha 1	1306	NM_004143	Hs.40403
1.75e-05	3.73e-05	10.22	1556499_s_at	COL1A1	collagen, type I, alpha 1	1277	NM_003136	Hs.167535	Protein export
1.7e-06	4.57e-06	6.04	208096_s_at	COL21A1	collagen, type XXI, alpha 1	81578	AI743792	Hs.207459	Metabolic pathways, N-Glycan biosynthesis, Other types of O-glycan biosynthesis
7.7e-06	1.77e-05	4.12	212489_at	COL5A1	collagen, type V, alpha 1	1289	M81695	Hs.248472	Dendritic cells in regulating TH1 and TH2 Development, Regulation of actin cytoskeleton
< 1e-07	< 1e-07	5.15	212488_at	COL5A1	collagen, type V, alpha 1	1289	R51324	Hs.460355	Activation of PKC through G protein coupled receptor, Activation of Src by Protein-tyrosine phosphatase alpha, Angiotensin II mediated activation of JNK Pathway via Pyk2 dependent signaling, Apoptotic Signaling in Response to DNA Damage, Aspirin Blocks Signaling Pathway Involved in Platelet Activation, Attenuation of GPCR Signaling, BCR Signaling Pathway, Bioactive Peptide Induced Signaling Pathw…
< 1e-07	< 1e-07	0.099	221019_s_at	COLEC12	collectin sub-family member 12	81035	NM_002738	Hs.460355	Activation of PKC through G protein coupled receptor, Activation of Src by Protein-tyrosine phosphatase alpha, Angiotensin II mediated activation of JNK Pathway via Pyk2 dependent signaling, Apoptotic Signaling in Response to DNA Damage, Aspirin Blocks Signaling Pathway Involved in Platelet Activation, Attenuation of GPCR Signaling, BCR Signaling Pathway, Bioactive Peptide Induced Signaling Pathw…
< 1e-07	< 1e-07	0.014	209083_at	CORO1A	coronin, actin binding protein, 1A	11151	AI611648	Hs.647121
9e-07	2.6e-06	4.7	223281_s_at	COX15	cytochrome c oxidase assembly homolog 15 (yeast)	1355	BC006428	Hs.744933
1.5e-06	4.09e-06	0.14	206100_at	CPM	carboxypeptidase M	1368	AA873350	Hs.489615	Nicotinate and nicotinamide metabolism
< 1e-07	< 1e-07	0.16	235706_at	CPM	carboxypeptidase M	1368	AI042017	Hs.496969	Amino sugar and nucleotide sugar metabolism
1e-07	3.48e-07	0.19	241765_at	CPM	carboxypeptidase M	1368	AI741056	Hs.591014	Adhesion and Diapedesis of Granulocytes, Cells and Molecules involved in local acute inflammatory response, Cell adhesion molecules (CAMs), Staphylococcus aureus infection
9e-07	2.6e-06	0.14	218610_s_at	CPPED1	calcineurin-like phosphoesterase domain containing 1	55313	AK001782	Hs.744933
< 1e-07	< 1e-07	0.17	222686_s_at	CPPED1	calcineurin-like phosphoesterase domain containing 1	55313	AA868754	Hs.8118
2e-07	6.63e-07	0.23	239135_at	CPPED1	calcineurin-like phosphoesterase domain containing 1	55313	NM_024898	Hs.236449
< 1e-07	< 1e-07	0.11	208146_s_at	CPVL	carboxypeptidase, vitellogenic-like	54504	AI263909	Hs.502876
< 1e-07	< 1e-07	0.019	244313_at	CR1	complement component (3b/4b) receptor 1 (Knops blood group)	1378	NM_024624	Hs.526728
< 1e-07	< 1e-07	0.052	217552_x_at	CR1	complement component (3b/4b) receptor 1 (Knops blood group)	1378	NM_003483	Hs.505924
< 1e-07	3.48e-07	0.24	206244_at	CR1	complement component (3b/4b) receptor 1 (Knops blood group)	1378	NM_007287	Hs.307734	Alzheimer's disease, Hematopoietic cell lineage, Protein digestion and absorption, Renin-angiotensin system
6e-07	1.81e-06	4.07	228752_at	CRACR2A	calcium release activated channel regulator 2A	84766	AV717590	Hs.576612	Purine metabolism, Pyrimidine metabolism
< 1e-07	< 1e-07	0.12	232555_at	CREB5	cAMP responsive element binding protein 5	9586	NM_016543	Hs.655393
8.09e-05	0.000154	4.73	228496_s_at	CRIM1	cysteine rich transmembrane BMP regulator 1 (chordin-like)	51232	NM_022367	Hs.408846	Axon guidance
< 1e-07	< 1e-07	0.059	205081_at	CRIP1	cysteine-rich protein 1 (intestinal)	1396	NM_003118	Hs.111779
< 1e-07	< 1e-07	0.069	221541_at	CRISPLD2	cysteine-rich secretory protein LCCL domain containing 2	83716	AW006735	Hs.85258	IL 17 Signaling Pathway, Regulation of hematopoiesis by cytokines, T Cytotoxic Cell Surface Molecules, Antigen processing and presentation, Cell adhesion molecules (CAMs), Hematopoietic cell lineage, Primary immunodeficiency, T cell receptor signaling pathway
4e-07	1.25e-06	0.21	202226_s_at	CRK	v-crk avian sarcoma virus CT10 oncogene homolog	1398	AL137764	Hs.15200	Endocytosis
< 1e-07	< 1e-07	0.19	205474_at	CRLF3	cytokine receptor-like factor 3	51379	U90902	Hs.517228	Chemokine signaling pathway, Regulation of actin cytoskeleton
0.0005615	0.000915	4.16	238021_s_at	CRNDE	colorectal neoplasia differentially expressed (non-protein coding)	643911	NM_018399	Hs.183656
3e-07	9.59e-07	6.4	201111_at	CSE1L	CSE1 chromosome segregation 1-like (yeast)	1434	AF253977	Hs.523702
2.6e-06	6.67e-06	0.12	203104_at	CSF1R	colony stimulating factor 1 receptor	1436	M79321	Hs.491767	BCR Signaling Pathway, Eph Kinases and ephrins support platelet aggregation, Fc Epsilon Receptor I Signaling in Mast Cells, Phosphoinositides and their downstream targets., B cell receptor signaling pathway, Chemokine signaling pathway, Epithelial cell signaling in Helicobacter pylori infection, Fc epsilon RI signaling pathway, Fc gamma R-mediated phagocytosis, Long-term depression
< 1e-07	< 1e-07	0.0053	205159_at	CSF2RB	colony stimulating factor 2 receptor, beta, low-affinity (granulocyte-macrophage)	1439	NM_030797	Hs.467769
< 1e-07	< 1e-07	0.021	203591_s_at	CSF3R	colony stimulating factor 3 receptor (granulocyte)	1441	D87291	Hs.411299	Gastric acid secretion
< 1e-07	3.48e-07	0.064	1553297_a_at	CSF3R	colony stimulating factor 3 receptor (granulocyte)	1441	AA622495	Hs.655559
3e-07	9.59e-07	0.23	1556006_s_at	CSNK1A1	casein kinase 1, alpha 1	1452	AI261321	Hs.591566
2.48e-05	5.15e-05	0.25	240221_at	CSNK1A1	casein kinase 1, alpha 1	1452	AV722693	Hs.504765	Dorso-ventral axis formation
3e-07	9.59e-07	5.68	39966_at	CSPG5	chondroitin sulfate proteoglycan 5 (neuroglycan C)	10675	NM_052889	Hs.348365
7e-07	2.07e-06	0.094	201360_at	CST3	cystatin C	1471	NM_003059	Hs.310591
< 1e-07	< 1e-07	0.037	210140_at	CST7	cystatin F (leukocystatin)	8530	NM_006498	Hs.531776
1e-07	3.48e-07	0.047	204971_at	CSTA	cystatin A (stefin A)	1475	AW613387	Hs.180903	Bladder cancer, Drug metabolism - other enzymes, Metabolic pathways, Pyrimidine metabolism
0.0003089	0.000528	0.23	209101_at	CTGF	connective tissue growth factor	1490	AK024449	Hs.47382
3.4e-06	8.49e-06	6.31	225681_at	CTHRC1	collagen triple helix repeat containing 1	115908	U46010	Hs.396530	Signaling of Hepatocyte Growth Factor Receptor, Cytokine-cytokine receptor interaction, Focal adhesion, Malaria, Melanoma, Pathways in cancer, Renal cell carcinoma
3.1e-05	6.32e-05	4.05	241255_at	CTNNA3	catenin (cadherin-associated protein), alpha 3	29119	AI431931	Hs.647071
1e-06	2.86e-06	4.93	236576_at	CTNNA3	catenin (cadherin-associated protein), alpha 3	29119	NM_001311	Hs.70327
< 1e-07	3.48e-07	0.14	227961_at	CTSB	cathepsin B	1508	AI375115	Hs.369022
< 1e-07	3.48e-07	0.22	200838_at	CTSB	cathepsin B	1508	NM_001150	Hs.1239	Dendritic cells in regulating TH1 and TH2 Development, SARS Coronavirus Protease, Glutathione metabolism, Hematopoietic cell lineage, Metabolic pathways, Renin-angiotensin system
< 1e-07	< 1e-07	0.051	225647_s_at	CTSC	cathepsin C	1075	NM_018295	Hs.521213
< 1e-07	< 1e-07	0.054	202295_s_at	CTSH	cathepsin H	1512	NM_000962	Hs.201978	Aspirin Blocks Signaling Pathway Involved in Platelet Activation, Eicosanoid Metabolism, Mechanism of Acetaminophen Activity and Toxicity, Arachidonic acid metabolism, Metabolic pathways
< 1e-07	< 1e-07	0.026	232617_at	CTSS	cathepsin S	1520	NM_002463	Hs.926
< 1e-07	< 1e-07	0.038	202902_s_at	CTSS	cathepsin S	1520	NM_003810	Hs.478275	Induction of apoptosis through DR3 and DR4/5 Death Receptors , Apoptosis, Cytokine-cytokine receptor interaction, Natural killer cell mediated cytotoxicity
< 1e-07	3.48e-07	0.056	202901_x_at	CTSS	cathepsin S	1520	Z70519	Hs.244139	Antigen Dependent B Cell Activation, Bystander B Cell Activation, CTL mediated immune response against target cells , FAS signaling pathway ( CD95 ), HIV Induced T Cell Apoptosis, HIV-I Nef: negative effector of Fas and TNF, IL-2 Receptor Beta Chain in T cell Activation, Keratinocyte Differentiation, Regulation of transcriptional activity by PML, Stress Induction of HSP Regulation, African trypan…
2e-07	6.63e-07	0.23	214450_at	CTSW	cathepsin W	1521	NM_002201	Hs.459265
4.4e-06	1.07e-05	0.17	210257_x_at	CUL4B	cullin 4B	8450	AB021123	Hs.98785
1.62e-05	3.48e-05	0.21	215997_s_at	CUL4B	cullin 4B	8450	BC020691	Hs.489615	Nicotinate and nicotinamide metabolism
2.99e-05	6.11e-05	0.22	202213_s_at	CUL4B	cullin 4B	8450	NM_004334	Hs.720344	Calcium signaling pathway, Metabolic pathways, Nicotinate and nicotinamide metabolism, Pancreatic secretion, Salivary secretion
1.1e-06	3.1e-06	0.23	202214_s_at	CUL4B	cullin 4B	8450	AI038737	Hs.116471
< 1e-07	< 1e-07	0.01	205898_at	CX3CR1	chemokine (C-X3-C motif) receptor 1	1524	BE271644	Hs.47382
1.5e-06	4.09e-06	0.15	223454_at	CXCL16	chemokine (C-X-C motif) ligand 16	58191	AF000425	Hs.436066
2.1e-06	5.49e-06	0.062	209774_x_at	CXCL2	chemokine (C-X-C motif) ligand 2	2920	NM_001099	Hs.433060	Riboflavin metabolism
2.45e-05	5.09e-05	0.07	207850_at	CXCL3	chemokine (C-X-C motif) ligand 3	2921	AA897516	Hs.199248	Eicosanoid Metabolism, Neuroactive ligand-receptor interaction
< 1e-07	< 1e-07	0.24	207094_at	CXCR1	chemokine (C-X-C motif) receptor 1	3577	N63244	Hs.303023	Gap junction, Pathogenic Escherichia coli infection, Phagosome
< 1e-07	< 1e-07	0.0042	207008_at	CXCR2	chemokine (C-X-C motif) receptor 2	3579	NM_021136	Hs.368626
< 1e-07	3.48e-07	0.076	217028_at	CXCR4	chemokine (C-X-C motif) receptor 4	7852	BC002490	Hs.744933
< 1e-07	< 1e-07	0.087	209201_x_at	CXCR4	chemokine (C-X-C motif) receptor 4	7852	NM_006084	Hs.1706	Bone Remodelling, IFN alpha signaling pathway, Hepatitis C, Jak-STAT signaling pathway, Osteoclast differentiation
< 1e-07	< 1e-07	0.1	211919_s_at	CXCR4	chemokine (C-X-C motif) receptor 4	7852	BE676214	Hs.654754	Regulation of actin cytoskeleton
< 1e-07	< 1e-07	8.12	224516_s_at	CXXC5	CXXC finger protein 5	51523	AA147933	Hs.594351	Role of EGF Receptor Transactivation by GPCRs in Cardiac Hypertrophy
< 1e-07	< 1e-07	9.6	233955_x_at	CXXC5	CXXC finger protein 5	51523	NM_016332	Hs.655346
< 1e-07	< 1e-07	11.75	222996_s_at	CXXC5	CXXC finger protein 5	51523	AF151824	Hs.603930	mTOR signaling pathway
< 1e-07	< 1e-07	0.19	219079_at	CYB5R4	cytochrome b5 reductase 4	51167	AFFX-HUMISGF3A/M97935_MB	Hs.642990	Apoptotic Signaling in Response to DNA Damage, Bioactive Peptide Induced Signaling Pathway, EGF Signaling Pathway, IFN alpha signaling pathway, IFN gamma signaling pathway , IL-10 Anti-inflammatory Signaling Pathway, IL22 Soluble Receptor Signaling Pathway , Inhibition of Cellular Proliferation by Gleevec, MAPKinase Signaling Pathway, p38 MAPK Signaling Pathway , PDGF Signaling Pathway, TPO Signa…
0.0003157	0.000538	0.18	203028_s_at	CYBA	cytochrome b-245, alpha polypeptide	1535	AF100544	Hs.485233	BCR Signaling Pathway, Bioactive Peptide Induced Signaling Pathway, Control of skeletal myogenesis by HDAC & calcium/calmodulin-dependent kinase (CaMK), fMLP induced chemokine gene expression in HMC-1 cells, GATA3 participate in activating the Th2 cytokine genes expression, Human Cytomegalovirus and Map Kinase Pathways, IL12 and Stat4 Dependent Signaling Pathway in Th1 Development, Keratinocyte D…
< 1e-07	< 1e-07	0.023	203923_s_at	CYBB	cytochrome b-245, beta polypeptide	1536	AK023520	Hs.349283
3e-07	9.59e-07	0.063	203922_s_at	CYBB	cytochrome b-245, beta polypeptide	1536	NM_003177	Hs.371720	Aspirin Blocks Signaling Pathway Involved in Platelet Activation, BCR Signaling Pathway, Fc Epsilon Receptor I Signaling in Mast Cells, IL 2 signaling pathway, IL-2 Receptor Beta Chain in T cell Activation, Ras-Independent pathway in NK cell-mediated cytotoxicity, B cell receptor signaling pathway, Fc epsilon RI signaling pathway, Fc gamma R-mediated phagocytosis, Natural killer cell mediated cyt…
9.5e-06	2.12e-05	11.34	1554296_at	CYP19A1	cytochrome P450, family 19, subfamily A, polypeptide 1	1588	NM_002923	Hs.78944
< 1e-07	< 1e-07	23.97	240863_at	CYP19A1	cytochrome P450, family 19, subfamily A, polypeptide 1	1588	AI097229	Hs.217484
< 1e-07	< 1e-07	0.13	231747_at	CYSLTR1	cysteinyl leukotriene receptor 1	10800	NM_003151	Hs.80642	IL12 and Stat4 Dependent Signaling Pathway in Th1 Development, NO2-dependent IL 12 Pathway in NK cells, Jak-STAT signaling pathway
< 1e-07	< 1e-07	0.15	230866_at	CYSLTR1	cysteinyl leukotriene receptor 1	10800	AW008519	Hs.534648
1e-07	3.48e-07	0.24	202880_s_at	CYTH1	cytohesin 1	9267	NM_018434	Hs.484363
< 1e-07	< 1e-07	0.067	219183_s_at	CYTH4	cytohesin 4	27128	AF109683	Hs.572535
< 1e-07	< 1e-07	0.011	209606_at	CYTIP	cytohesin 1 interacting protein	9595	AW469546	Hs.535845
5.3e-06	1.26e-05	4.93	226666_at	DAAM1	dishevelled associated activator of morphogenesis 1	23002	AL558987	Hs.142074
9e-07	2.6e-06	5.9	216060_s_at	DAAM1	dishevelled associated activator of morphogenesis 1	23002	NM_002229	Hs.25292	Osteoclast differentiation
< 1e-07	< 1e-07	0.09	201279_s_at	DAB2	Dab, mitogen-responsive phosphoprotein, homolog 2 (Drosophila)	1601	AW511319	Hs.643605
< 1e-07	< 1e-07	0.16	201280_s_at	DAB2	Dab, mitogen-responsive phosphoprotein, homolog 2 (Drosophila)	1601	NM_003982	Hs.513147	Protein digestion and absorption
< 1e-07	< 1e-07	0.18	210757_x_at	DAB2	Dab, mitogen-responsive phosphoprotein, homolog 2 (Drosophila)	1601	AY034790	Hs.4859
< 1e-07	3.48e-07	0.25	201278_at	DAB2	Dab, mitogen-responsive phosphoprotein, homolog 2 (Drosophila)	1601	AI809341	Hs.654514	Activation of Csk by cAMP-dependent Protein Kinase Inhibits Signaling through the T Cell Receptor, B Lymphocyte Cell Surface Molecules, Lck and Fyn tyrosine kinases in initiation of TCR Activation, T Cytotoxic Cell Surface Molecules, T Helper Cell Surface Molecules, Cell adhesion molecules (CAMs), Fc gamma R-mediated phagocytosis, Primary immunodeficiency, T cell receptor signaling pathway
1e-07	3.48e-07	0.21	205471_s_at	DACH1	dachshund family transcription factor 1	1602	BG540504	Hs.435949
< 1e-07	< 1e-07	9.84	219179_at	DACT1	dishevelled-binding antagonist of beta-catenin 1	51339	NM_007268	Hs.8904
< 1e-07	< 1e-07	0.19	203139_at	DAPK1	death-associated protein kinase 1	1612	AL135787	Hs.584864
< 1e-07	< 1e-07	0.12	222859_s_at	DAPP1	dual adaptor of phosphotyrosine and 3-phosphoinositides	27071	AF032105	Hs.476595
< 1e-07	< 1e-07	0.17	222858_s_at	DAPP1	dual adaptor of phosphotyrosine and 3-phosphoinositides	27071	NM_003266	Hs.174312	Amoebiasis, Chagas disease (American trypanosomiasis), Leishmaniasis, Malaria, Pathogenic Escherichia coli infection, Phagosome, Rheumatoid arthritis, Toll-like receptor signaling pathway, Toxoplasmosis
8.04e-05	0.000153	4.38	230679_at	DCAF10	DDB1 and CUL4 associated factor 10	79269	NM_004510	Hs.145150
< 1e-07	< 1e-07	6.31	238205_at	DCAF12L1	DDB1 and CUL4 associated factor 12-like 1	139170	U08626	Hs.132016	Alanine, aspartate and glutamate metabolism, Arginine and proline metabolism, Metabolic pathways, Nitrogen metabolism
3.63e-05	7.33e-05	4.79	239330_at	DCAF12L2	DDB1 and CUL4 associated factor 12-like 2	340578	NM_025113	Hs.98117
1.78e-05	3.79e-05	5.05	1553768_a_at	DCBLD1	discoidin, CUB and LCCL domain containing 1	285761	AL049435	Hs.369265	Signal transduction through IL1R, Apoptosis, Neurotrophin signaling pathway
6.5e-06	1.52e-05	7.56	215303_at	DCLK1	doublecortin-like kinase 1	9201	AI972498	Hs.97469
2e-06	5.25e-06	8.76	230962_at	DCLK1	doublecortin-like kinase 1	9201	AF327656	Hs.32942	AKT Signaling Pathway, B Cell Survival Pathway, Control of skeletal myogenesis by HDAC & calcium/calmodulin-dependent kinase (CaMK), Corticosteroids and cardioprotection, CTCF: First Multivalent Nuclear Factor, Erk and PI-3 Kinase Are Necessary for Collagen Binding in Corneal Epithelia, Fc Epsilon Receptor I Signaling in Mast Cells, Growth Hormone Signaling Pathway, Human Cytomegalovirus and Map …
0.0004235	0.000706	10.03	229800_at	DCLK1	doublecortin-like kinase 1	9201	NM_023071	Hs.654826
4.7e-06	1.13e-05	14.85	205399_at	DCLK1	doublecortin-like kinase 1	9201	BF109252	Hs.657382
< 1e-07	3.48e-07	0.21	222678_s_at	DCUN1D1	DCN1, defective in cullin neddylation 1, domain containing 1	54165	AB045118	Hs.140720	Wnt signaling pathway
4.55e-05	9.04e-05	4.44	209094_at	DDAH1	dimethylarginine dimethylaminohydrolase 1	23576	NM_024576	Hs.648434
8.29e-05	0.000158	6.86	230180_at	DDX17	DEAD (Asp-Glu-Ala-Asp) box helicase 17	10521	AF217970	Hs.656318
3.2e-06	8.06e-06	7.72	213998_s_at	DDX17	DEAD (Asp-Glu-Ala-Asp) box helicase 17	10521	AA477260	Hs.398093
< 1e-07	< 1e-07	0.17	218943_s_at	DDX58	DEAD (Asp-Glu-Ala-Asp) box polypeptide 58	23586	NM_020645	Hs.523467
< 1e-07	< 1e-07	0.083	226659_at	DEF6	differentially expressed in FDCP 6 homolog (mouse)	50619	NM_004633	Hs.25333	Amoebiasis, Cytokine-cytokine receptor interaction, Hematopoietic cell lineage, MAPK signaling pathway
< 1e-07	< 1e-07	0.21	221080_s_at	DENND1C	DENN/MADD domain containing 1C	79958	AF041461	Hs.390736	FAS signaling pathway ( CD95 ), HIV-I Nef: negative effector of Fas and TNF, IL-2 Receptor Beta Chain in T cell Activation, Induction of apoptosis through DR3 and DR4/5 Death Receptors , Apoptosis, Chagas disease (American trypanosomiasis)
< 1e-07	< 1e-07	0.25	221081_s_at	DENND2D	DENN/MADD domain containing 2D	79961	AW392551	Hs.436061	The information-processing pathway at the IFN-beta enhancer, Hepatitis C
< 1e-07	< 1e-07	0.19	212975_at	DENND3	DENN/MADD domain containing 3	22898	NM_007267	Hs.632227
0.0002041	0.000361	0.16	214079_at	DHRS2	dehydrogenase/reductase (SDR family) member 2	10202	AI382123	Hs.16355	Regulation of actin cytoskeleton, Tight junction, Viral myocarditis
< 1e-07	< 1e-07	0.24	209190_s_at	DIAPH1	diaphanous-related formin 1	1729	NM_173558	Hs.509664
8e-07	2.34e-06	0.22	200664_s_at	DNAJB1	DnaJ (Hsp40) homolog, subfamily B, member 1	3337	AA083478	Hs.501778
0.0002724	0.00047	0.21	218435_at	DNAJC15	DnaJ (Hsp40) homolog, subfamily C, member 15	29103	R69077	Hs.434298
2.78e-05	5.72e-05	6.37	226281_at	DNER	delta/notch-like EGF repeat containing	92737	NM_017654	Hs.65641
< 1e-07	< 1e-07	0.016	226875_at	DOCK11	dedicator of cytokinesis 11	139818	NM_006633	Hs.291030	Regulation of actin cytoskeleton
< 1e-07	< 1e-07	0.067	205003_at	DOCK4	dedicator of cytokinesis 4	9732	AA584428	Hs.597057
< 1e-07	< 1e-07	0.15	244840_x_at	DOCK4	dedicator of cytokinesis 4	9732	NM_000167	Hs.1466	Glycerolipid metabolism, Metabolic pathways, PPAR signaling pathway
0.0001505	0.000272	0.23	230207_s_at	DOCK5	dedicator of cytokinesis 5	80005	NM_015895	Hs.234896
< 1e-07	< 1e-07	0.02	225502_at	DOCK8	dedicator of cytokinesis 8	81704	BE349017	Hs.465521
< 1e-07	< 1e-07	0.023	232843_s_at	DOCK8	dedicator of cytokinesis 8	81704	NM_017935	Hs.480400
< 1e-07	< 1e-07	0.04	223553_s_at	DOK3	docking protein 3	79930	X83493	Hs.244139	Antigen Dependent B Cell Activation, Bystander B Cell Activation, CTL mediated immune response against target cells , FAS signaling pathway ( CD95 ), HIV Induced T Cell Apoptosis, HIV-I Nef: negative effector of Fas and TNF, IL-2 Receptor Beta Chain in T cell Activation, Keratinocyte Differentiation, Regulation of transcriptional activity by PML, Stress Induction of HSP Regulation, African trypan…
< 1e-07	< 1e-07	15.44	1554863_s_at	DOK5	docking protein 5	55816	AI707896	Hs.592804
< 1e-07	< 1e-07	33.59	214844_s_at	DOK5	docking protein 5	55816	AK025272	Hs.529984
3.1e-06	7.84e-06	6.42	236442_at	DPF3	D4, zinc and double PHD fingers, family 3	8110	NM_021960	Hs.632486
< 1e-07	3.48e-07	4.19	222360_at	DPH5	diphthamide biosynthesis 5	51611	M15330	Hs.126256	IL 5 Signaling Pathway, Msp/Ron Receptor Signaling Pathway, NFkB activation by Nontypeable Hemophilus influenzae, Signal transduction through IL1R, African trypanosomiasis, Alzheimer's disease, Amoebiasis, Apoptosis, Chagas disease (American trypanosomiasis), Cytokine-cytokine receptor interaction, Cytosolic DNA-sensing pathway, Graft-versus-host disease, Hematopoietic cell lineage, Leishmaniasis…
7.5e-06	1.72e-05	4.34	238784_at	DPY19L2	dpy-19-like 2 (C. elegans)	283417	AA541479	Hs.653654	Angiotensin II mediated activation of JNK Pathway via Pyk2 dependent signaling, BCR Signaling Pathway, CD40L Signaling Pathway, Ceramide Signaling Pathway, EGF Signaling Pathway, FAS signaling pathway ( CD95 ), Fc Epsilon Receptor I Signaling in Mast Cells, fMLP induced chemokine gene expression in HMC-1 cells, HIV-I Nef: negative effector of Fas and TNF, Human Cytomegalovirus and Map Kinase Path…
< 1e-07	< 1e-07	5.34	213391_at	DPY19L4	dpy-19-like 4 (C. elegans)	286148	M60721	Hs.74870
1e-07	3.48e-07	0.082	204646_at	DPYD	dihydropyrimidine dehydrogenase	1806	NM_004390	Hs.148641	Lysosome
6.86e-05	0.000132	6.3	205493_s_at	DPYSL4	dihydropyrimidinase-like 4	10570	NM_005767	Hs.123464	Neuroactive ligand-receptor interaction
1.93e-05	4.09e-05	5.06	200606_at	DSP	desmoplakin	1832	AF288571	Hs.743478	Inactivation of Gsk3 by AKT causes accumulation of b-catenin in Alveolar Macrophages, Multi-step Regulation of Transcription by Pitx2, Acute myeloid leukemia, Adherens junction, Arrhythmogenic right ventricular cardiomyopathy (ARVC), Basal cell carcinoma, Colorectal cancer, Endometrial cancer, Melanogenesis, Pathways in cancer, Prostate cancer, Thyroid cancer, Wnt signaling pathway
< 1e-07	< 1e-07	8.06	227084_at	DTNA	dystrobrevin, alpha	1837	NM_020125	Hs.438683
< 1e-07	< 1e-07	0.074	204794_at	DUSP2	dual specificity phosphatase 2	1844	AI084226	Hs.58831
< 1e-07	< 1e-07	0.028	208892_s_at	DUSP6	dual specificity phosphatase 6	1848	AI368358	Hs.496969	Amino sugar and nucleotide sugar metabolism
< 1e-07	< 1e-07	0.037	208893_s_at	DUSP6	dual specificity phosphatase 6	1848	NM_000362	Hs.644633	Inhibition of Matrix Metalloproteinases, p53 Signaling Pathway
< 1e-07	< 1e-07	0.039	208891_at	DUSP6	dual specificity phosphatase 6	1848	AA290609	Hs.368592
0.000253	0.000441	4.06	239010_at	DUXAP10	double homeobox A pseudogene 10	503639	AK025695	Hs.26403
5e-07	1.53e-06	7.55	229115_at	DYNC1H1	dynein, cytoplasmic 1, heavy chain 1	1778	AU147506	Hs.7886
1.4e-06	3.86e-06	4.07	213186_at	DZIP3	DAZ interacting zinc finger protein 3	9666	BE396735	Hs.744938
< 1e-07	< 1e-07	48.28	228033_at	E2F7	E2F transcription factor 7	144455	AI363213	Hs.381058
4e-07	1.25e-06	0.2	219551_at	EAF2	ELL associated factor 2	55840	BC004470	Hs.499094	Cytosolic DNA-sensing pathway, NOD-like receptor signaling pathway
1e-06	2.86e-06	4.24	226635_at	EBLN3	endogenous Bornavirus-like nucleoprotein 3	100506710	BE874872	Hs.134742
< 1e-07	< 1e-07	167.36	225275_at	EDIL3	EGF-like repeats and discoidin I-like domains 3	10085	BF508702	Hs.77542	Calcium signaling pathway, Neuroactive ligand-receptor interaction, Staphylococcus aureus infection
8.11e-05	0.000154	6.96	204464_s_at	EDNRA	endothelin receptor type A	1909	AI348935	Hs.515162	NFAT and Hypertrophy of the heart (Transcription in the broken heart), Antigen processing and presentation, Chagas disease (American trypanosomiasis), Phagosome, Protein processing in endoplasmic reticulum
< 1e-07	< 1e-07	0.065	201693_s_at	EGR1	early growth response 1	1958	BF976693	Hs.376675	Adhesion and Diapedesis of Granulocytes, Adhesion and Diapedesis of Lymphocytes, Adhesion Molecules on Lymphocyte, Cell to Cell Adhesion Signaling, Monocyte and its Surface Molecules, Neutrophil and Its Surface Molecules, Cell adhesion molecules (CAMs), Leukocyte transendothelial migration, Malaria
0.0008027	0.00128	0.2	227404_s_at	EGR1	early growth response 1	1958	BC001120	Hs.531081
2.85e-05	5.85e-05	0.24	201694_s_at	EGR1	early growth response 1	1958	NM_001423	Hs.719042
< 1e-07	< 1e-07	0.066	205249_at	EGR2	early growth response 2	1959	BG251467	Hs.596025
< 1e-07	< 1e-07	0.2	212225_at	EIF1	eukaryotic translation initiation factor 1	10209	AW292746	Hs.484738
5.8e-06	1.37e-05	5.41	208624_s_at	EIF4G1	eukaryotic translation initiation factor 4 gamma, 1	1981	NM_002925	Hs.501200
< 1e-07	< 1e-07	4.34	244660_at	ELAVL1	ELAV like RNA binding protein 1	1994	AI935096	Hs.563344
< 1e-07	< 1e-07	0.18	204513_s_at	ELMO1	engulfment and cell motility 1	9844	N31913	Hs.201858
< 1e-07	< 1e-07	0.027	226789_at	EMB	embigin	133418	AW058622	Hs.128067
< 1e-07	< 1e-07	0.13	224374_s_at	EMILIN2	elastin microfibril interfacer 2	84034	BF436632	Hs.569124
7e-07	2.07e-06	0.085	201324_at	EMP1	epithelial membrane protein 1	2012	NM_004666	Hs.12114	Pantothenate and CoA biosynthesis
< 1e-07	< 1e-07	0.14	201325_s_at	EMP1	epithelial membrane protein 1	2012	NM_001584	Hs.289795
3.2e-06	8.06e-06	0.12	203729_at	EMP3	epithelial membrane protein 3	2014	NM_014716	Hs.337242	Endocytosis
1.4e-06	3.86e-06	4.26	222434_at	ENAH	enabled homolog (Drosophila)	55740	NM_003930	Hs.200770
< 1e-07	< 1e-07	5.59	222433_at	ENAH	enabled homolog (Drosophila)	55740	AV655640	Hs.440829
5e-07	1.53e-06	6.99	1553672_at	ENAH	enabled homolog (Drosophila)	55740	NM_004513	Hs.459095	Cytokine Network
6e-07	1.81e-06	7.56	217820_s_at	ENAH	enabled homolog (Drosophila)	55740	NM_005195	Hs.440829
< 1e-07	< 1e-07	7.59	228310_at	ENAH	enabled homolog (Drosophila)	55740	AI431730	Hs.656071
< 1e-07	< 1e-07	4.87	201341_at	ENC1	ectodermal-neural cortex 1 (with BTB domain)	8507	BF308645	Hs.153310	Chemokine signaling pathway
1e-07	3.48e-07	11.13	201340_s_at	ENC1	ectodermal-neural cortex 1 (with BTB domain)	8507	AF367476	Hs.4859
2.3e-06	5.97e-06	0.18	201809_s_at	ENG	endoglin	2022	NM_002600	Hs.198072	Purine metabolism
7.51e-05	0.000144	5.47	201313_at	ENO2	enolase 2 (gamma, neuronal)	2026	AF245505	Hs.369422
< 1e-07	< 1e-07	8.08	205066_s_at	ENPP1	ectonucleotide pyrophosphatase/phosphodiesterase 1	5167	NM_002977	Hs.439145
< 1e-07	< 1e-07	10.03	229088_at	ENPP1	ectonucleotide pyrophosphatase/phosphodiesterase 1	5167	U86453	Hs.518451	Acute myeloid leukemia, Aldosterone-regulated sodium reabsorption, Amoebiasis, Apoptosis, B cell receptor signaling pathway, Bacterial invasion of epithelial cells, Carbohydrate digestion and absorption, Chagas disease (American trypanosomiasis), Chemokine signaling pathway, Chronic myeloid leukemia, Colorectal cancer, Endometrial cancer, ErbB signaling pathway, Fc epsilon RI signaling pathway, F…
< 1e-07	< 1e-07	0.13	209473_at	ENTPD1	ectonucleoside triphosphate diphosphohydrolase 1	953	AI589086	Hs.371021	Lysosome
4e-07	1.25e-06	0.17	207691_x_at	ENTPD1	ectonucleoside triphosphate diphosphohydrolase 1	953	NM_006639	Hs.733809	Eicosanoid Metabolism, Calcium signaling pathway, Neuroactive ligand-receptor interaction
< 1e-07	< 1e-07	0.23	228585_at	ENTPD1	ectonucleoside triphosphate diphosphohydrolase 1	953	NM_002227	Hs.207538	EGF Signaling Pathway, IFN alpha signaling pathway, IFN gamma signaling pathway , IL 2 signaling pathway, IL 4 signaling pathway, IL 6 signaling pathway, IL-10 Anti-inflammatory Signaling Pathway, IL-2 Receptor Beta Chain in T cell Activation, IL22 Soluble Receptor Signaling Pathway , IL-7 Signal Transduction, PDGF Signaling Pathway, Stat3 Signaling Pathway, Hepatitis C, Jak-STAT signaling pathwa…
7e-07	2.07e-06	6.63	212336_at	EPB41L1	erythrocyte membrane protein band 4.1-like 1	2036	BE620374	Hs.648434
< 1e-07	< 1e-07	17.01	212339_at	EPB41L1	erythrocyte membrane protein band 4.1-like 1	2036	BE967048	Hs.744057
0.0006598	0.00107	0.23	223427_s_at	EPB41L4B	erythrocyte membrane protein band 4.1 like 4B	54566	AA749101	Hs.458414	B cell receptor signaling pathway
9.5e-06	2.12e-05	0.083	210746_s_at	EPB42	erythrocyte membrane protein band 4.2	2038	AA149745	Hs.435711
0.0001538	0.000277	4.55	223253_at	EPDR1	ependymin related 1	54749	NM_000024	Hs.2551	Corticosteroids and cardioprotection, Cystic fibrosis transmembrane conductance regulator (CFTR) and beta 2 adrenergic receptor (b2AR) pathway, Phospholipase C-epsilon pathway, Calcium signaling pathway, Endocytosis, Neuroactive ligand-receptor interaction, Salivary secretion
3e-07	9.59e-07	4.82	203499_at	EPHA2	EPH receptor A2	1969	BF223300	Hs.497893	Regulation of actin cytoskeleton
2.54e-05	5.26e-05	4.91	227449_at	EPHA4	EPH receptor A4	2043	BF939675	Hs.558009
4.8e-06	1.16e-05	5.65	206114_at	EPHA4	EPH receptor A4	2043	L35253	Hs.485233	BCR Signaling Pathway, Bioactive Peptide Induced Signaling Pathway, Control of skeletal myogenesis by HDAC & calcium/calmodulin-dependent kinase (CaMK), fMLP induced chemokine gene expression in HMC-1 cells, GATA3 participate in activating the Th2 cytokine genes expression, Human Cytomegalovirus and Map Kinase Pathways, IL12 and Stat4 Dependent Signaling Pathway in Th1 Development, Keratinocyte D…
2.24e-05	4.68e-05	4.04	215664_s_at	EPHA5	EPH receptor A5	2044	BC016183	Hs.368264	mRNA surveillance pathway, Oocyte meiosis, Wnt signaling pathway
2e-06	5.25e-06	8.15	237939_at	EPHA5	EPH receptor A5	2044	AI817801	Hs.654500	NOD-like receptor signaling pathway
2.52e-05	5.23e-05	4.55	232164_s_at	EPPK1	epiplakin 1	83481	AI074145	Hs.731056	Metabolic pathways, Tryptophan metabolism
1.1e-06	3.1e-06	5.83	232165_at	EPPK1	epiplakin 1	83481	T53260	Hs.529989
< 1e-07	< 1e-07	0.15	227609_at	EPSTI1	epithelial stromal interaction 1 (breast)	94240	AI129310	Hs.98117
1e-07	3.48e-07	0.16	235276_at	EPSTI1	epithelial stromal interaction 1 (breast)	94240	NM_000634	Hs.194778	Chemokine signaling pathway, Cytokine-cytokine receptor interaction, Endocytosis, Epithelial cell signaling in Helicobacter pylori infection
0.0003052	0.000523	8.37	206439_at	EPYC	epiphycan	1833	AK022128	Hs.65366
7.24e-05	0.000139	0.17	219759_at	ERAP2	endoplasmic reticulum aminopeptidase 2	64167	NM_007256	Hs.7884
1.1e-05	2.43e-05	0.16	1569583_at	EREG	epiregulin	2069	AK091818	Hs.647079
< 1e-07	< 1e-07	4.97	226422_at	ERGIC2	ERGIC and golgi 2	51290	NM_016184	Hs.504657
1.89e-05	4.01e-05	5.69	222603_at	ERMP1	endoplasmic reticulum metallopeptidase 1	79956	AK024431	Hs.494895
1e-07	3.48e-07	0.24	204034_at	ETHE1	ethylmalonic encephalopathy 1	23474	AF116273	Hs.377484	Protein processing in endoplasmic reticulum
6.29e-05	0.000122	0.19	224833_at	ETS1	v-ets avian erythroblastosis virus E26 oncogene homolog 1	2113	NM_004456	Hs.444082	The PRC2 Complex Sets Long-term Gene Silencing Through Modification of Histone Tails
< 1e-07	< 1e-07	0.22	1555355_a_at	ETS1	v-ets avian erythroblastosis virus E26 oncogene homolog 1	2113	AV702357	Hs.655271
< 1e-07	< 1e-07	0.14	201328_at	ETS2	v-ets avian erythroblastosis virus E26 oncogene homolog 2	2114	AJ010102	Hs.9688
0.0003342	0.000567	0.25	201329_s_at	ETS2	v-ets avian erythroblastosis virus E26 oncogene homolog 2	2114	AU156710	Hs.123072	Tight junction
< 1e-07	< 1e-07	0.22	235056_at	ETV6	ets variant 6	2120	BF437747	Hs.580681
< 1e-07	< 1e-07	0.024	204774_at	EVI2A	ecotropic viral integration site 2A	2123	AA102574	Hs.509140
< 1e-07	< 1e-07	0.012	211742_s_at	EVI2B	ecotropic viral integration site 2B	2124	NM_003469	Hs.516726
3e-07	9.59e-07	4.64	229966_at	EWSR1	EWS RNA-binding protein 1	2130	NM_020307	Hs.4859
6e-07	1.81e-06	8.21	230183_at	EXT1	exostosin glycosyltransferase 1	2131	NM_003853	Hs.158315	Cytokine-cytokine receptor interaction
2e-07	6.63e-07	9.11	214985_at	EXT1	exostosin glycosyltransferase 1	2131	AI669947	Hs.567828
< 1e-07	< 1e-07	11.17	203358_s_at	EZH2	enhancer of zeste 2 polycomb repressive complex 2 subunit	2146	NM_006770	Hs.67726	Phagosome
< 1e-07	< 1e-07	0.16	208623_s_at	EZR	ezrin	7430	AW339310	Hs.643454
< 1e-07	< 1e-07	0.017	203305_at	F13A1	coagulation factor XIII, A1 polypeptide	2162	BC004372	Hs.502328	Adhesion Molecules on Lymphocyte, Monocyte and its Surface Molecules, Neutrophil and Its Surface Molecules, ECM-receptor interaction, Hematopoietic cell lineage, Shigellosis
1.7e-06	4.57e-06	8.86	214285_at	FABP3	fatty acid binding protein 3, muscle and heart	2170	AI246687	Hs.128065	Lysosome
4.46e-05	8.87e-05	0.2	202345_s_at	FABP5	fatty acid binding protein 5 (psoriasis-associated)	2171	NM_017617	Hs.495473	Presenilin action in Notch and Wnt signaling, Proteolysis and Signaling Pathway of Notch , Segmentation Clock, Dorso-ventral axis formation, Notch signaling pathway, Prion diseases
< 1e-07	< 1e-07	0.099	221601_s_at	FAIM3	Fas apoptotic inhibitory molecule 3	9214	AB014486	Hs.200770
< 1e-07	< 1e-07	0.21	219694_at	FAM105A	family with sequence similarity 105, member A	54491	AK026079	Hs.655801	Apoptosis, Cytokine-cytokine receptor interaction, Natural killer cell mediated cytotoxicity
< 1e-07	3.48e-07	0.13	221249_s_at	FAM117A	family with sequence similarity 117, member A	81558	AA551090	Hs.121592	Lysosome
6.2e-06	1.45e-05	0.11	231874_at	FAM126B	family with sequence similarity 126, member B	285172	AF070673	Hs.618526
1.1e-06	3.1e-06	0.11	217967_s_at	FAM129A	family with sequence similarity 129, member A	116496	NM_021199	Hs.511251
3.7e-06	9.17e-06	7.28	1554547_at	FAM13C	family with sequence similarity 13, member C	220965	NM_004347	Hs.213327	NOD-like receptor signaling pathway
1.11e-05	2.45e-05	6.95	235850_at	FAM162A	family with sequence similarity 162, member A	26355	BC008992	Hs.473133
0.0008904	0.00141	0.24	242945_at	FAM20A	family with sequence similarity 20, member A	54757	AF009644	Hs.631592	B cell receptor signaling pathway, Osteoclast differentiation
0.0003096	0.000529	0.25	226804_at	FAM20A	family with sequence similarity 20, member A	54757	NM_005541	Hs.262886	B cell receptor signaling pathway, Fc epsilon RI signaling pathway, Fc gamma R-mediated phagocytosis, Insulin signaling pathway, Phosphatidylinositol signaling system
< 1e-07	< 1e-07	0.18	226722_at	FAM20C	family with sequence similarity 20, member C	56975	BC003070	Hs.524134	GATA3 participate in activating the Th2 cytokine genes expression
< 1e-07	< 1e-07	0.18	211068_x_at	FAM21C	family with sequence similarity 21, member C	253725	NM_017752	Hs.351798
8.56e-05	0.000162	0.093	226811_at	FAM46C	family with sequence similarity 46, member C	54855	BE676408	Hs.197644
< 1e-07	3.48e-07	0.15	220306_at	FAM46C	family with sequence similarity 46, member C	54855	AI274095	Hs.89983	Complement Pathway, Lectin Induced Complement Pathway, Complement and coagulation cascades, Staphylococcus aureus infection
< 1e-07	< 1e-07	0.15	208092_s_at	FAM49A	family with sequence similarity 49, member A	81553	NM_002934	Hs.728
2.1e-06	5.49e-06	0.25	209683_at	FAM49A	family with sequence similarity 49, member A	81553	NM_002436	Hs.496984
4e-07	1.25e-06	0.2	217534_at	FAM49B	family with sequence similarity 49, member B	51571	NM_006208	Hs.527295	Regulators of Bone Mineralization, Metabolic pathways, Nicotinate and nicotinamide metabolism, Pantothenate and CoA biosynthesis, Purine metabolism, Riboflavin metabolism, Starch and sucrose metabolism
3e-07	9.59e-07	4.89	218898_at	FAM57A	family with sequence similarity 57, member A	79850	NM_003474	Hs.594351	Role of EGF Receptor Transactivation by GPCRs in Cardiac Hypertrophy
1.6e-06	4.33e-06	0.048	209829_at	FAM65B	family with sequence similarity 65, member B	9750	AW027174	Hs.465812	Regulation of transcriptional activity by PML
< 1e-07	< 1e-07	0.053	206707_x_at	FAM65B	family with sequence similarity 65, member B	9750	AI761771	Hs.162233
5.8e-06	1.37e-05	0.21	227002_at	FAM78A	family with sequence similarity 78, member A	286336	NM_014879	Hs.2465	Neuroactive ligand-receptor interaction
< 1e-07	< 1e-07	7.35	1562904_s_at	FAM86B3P	family with sequence similarity 86, member A pseudogene	286042	AL574435	Hs.272011	Galactose metabolism, Glycosaminoglycan biosynthesis - keratan sulfate, Glycosphingolipid biosynthesis - lacto and neolacto series, Metabolic pathways, N-Glycan biosynthesis, Other types of O-glycan biosynthesis
< 1e-07	< 1e-07	7.38	234049_at	FAM86B3P	family with sequence similarity 86, member A pseudogene	286042	NM_015991	Hs.632379	Classical Complement Pathway, Complement Pathway, Chagas disease (American trypanosomiasis), Complement and coagulation cascades, Prion diseases, Staphylococcus aureus infection, Systemic lupus erythematosus
< 1e-07	< 1e-07	6.04	232968_at	FANK1	fibronectin type III and ankyrin repeat domains 1	92565	AA099357	Hs.709514	ABC transporters
< 1e-07	< 1e-07	0.11	220615_s_at	FAR2	fatty acyl CoA reductase 2	55711	NM_004833	Hs.733411	Cytosolic DNA-sensing pathway
< 1e-07	< 1e-07	0.16	239108_at	FAR2	fatty acyl CoA reductase 2	55711	AA043348	Hs.90093	Antigen processing and presentation
< 1e-07	< 1e-07	0.086	215719_x_at	FAS	Fas cell surface death receptor	355	AF188298	Hs.696631	Endocytosis
< 1e-07	< 1e-07	0.11	216252_x_at	FAS	Fas cell surface death receptor	355	AJ012502	Hs.413812	Agrin in Postsynaptic Differentiation, Angiotensin II mediated activation of JNK Pathway via Pyk2 dependent signaling, BCR Signaling Pathway, fMLP induced chemokine gene expression in HMC-1 cells, How does salmonella hijack a cell, Influence of Ras and Rho proteins on G1 to S Transition, Links between Pyk2 and Map Kinases, MAPKinase Signaling Pathway, p38 MAPK Signaling Pathway , Phosphoinositide…
< 1e-07	3.48e-07	0.22	204781_s_at	FAS	Fas cell surface death receptor	355	AW665656	Hs.132016	Alanine, aspartate and glutamate metabolism, Arginine and proline metabolism, Metabolic pathways, Nitrogen metabolism
3.6e-06	8.94e-06	0.23	204780_s_at	FAS	Fas cell surface death receptor	355	BF982174	Hs.26530
< 1e-07	< 1e-07	5.25	219427_at	FAT4	FAT atypical cadherin 4	79633	NM_005601	Hs.10306
1.5e-06	4.09e-06	4.6	202766_s_at	FBN1	fibrillin 1	2200	U64094	Hs.25333	Amoebiasis, Cytokine-cytokine receptor interaction, Hematopoietic cell lineage, MAPK signaling pathway
< 1e-07	< 1e-07	0.12	209696_at	FBP1	fructose-1,6-bisphosphatase 1	2203	AA524023	Hs.368433
0.0003259	0.000554	6.24	241762_at	FBXO32	F-box protein 32	114907	NM_031311	Hs.233389
< 1e-07	< 1e-07	0.18	231769_at	FBXO6	F-box protein 6	26270	AL157473	Hs.445885
< 1e-07	< 1e-07	0.015	204232_at	FCER1G	Fc fragment of IgE, high affinity I, receptor for; gamma polypeptide	2207	AK026420	Hs.207106
2e-07	6.63e-07	0.022	1554899_s_at	FCER1G	Fc fragment of IgE, high affinity I, receptor for; gamma polypeptide	2207	NM_014840	Hs.524692
< 1e-07	< 1e-07	0.016	214511_x_at	FCGR1B	Fc fragment of IgG, high affinity Ib, receptor (CD64)	2210	AF118887	Hs.267659	B cell receptor signaling pathway, Chemokine signaling pathway, Fc epsilon RI signaling pathway, Fc gamma R-mediated phagocytosis, Focal adhesion, Leukocyte transendothelial migration, Natural killer cell mediated cytotoxicity, Regulation of actin cytoskeleton, T cell receptor signaling pathway
< 1e-07	< 1e-07	0.055	210889_s_at	FCGR2B	Fc fragment of IgG, low affinity IIb, receptor (CD32)	2213	NM_005204	Hs.432453	MAPKinase Signaling Pathway, MAPK signaling pathway, T cell receptor signaling pathway, Toll-like receptor signaling pathway
< 1e-07	< 1e-07	0.066	210992_x_at	FCGR2C	Fc fragment of IgG, low affinity IIc, receptor for (CD32) (gene/pseudogene)	9103	T65020	Hs.407983
< 1e-07	3.48e-07	0.075	211395_x_at	FCGR2C	Fc fragment of IgG, low affinity IIc, receptor for (CD32) (gene/pseudogene)	9103	NM_014164	Hs.333418
< 1e-07	< 1e-07	0.0025	204007_at	FCGR3B	Fc fragment of IgG, low affinity IIIb, receptor (CD16b)	2215	BC016828	Hs.527412	Phospholipids as signalling intermediaries, Lysosome, Metabolic pathways, Sphingolipid metabolism
< 1e-07	< 1e-07	0.0098	205237_at	FCN1	ficolin (collagen/fibrinogen domain containing) 1	2219	H06187	Hs.40735	Basal cell carcinoma, Melanogenesis, Pathways in cancer, Wnt signaling pathway
< 1e-07	< 1e-07	0.1	231093_at	FCRL3	Fc receptor-like 3	115352	BG168471	Hs.277035	Glycerolipid metabolism, Metabolic pathways
1.1e-06	3.1e-06	4.15	204767_s_at	FEN1	flap structure-specific endonuclease 1	2237	U62027	Hs.591148	Complement and coagulation cascades, Neuroactive ligand-receptor interaction, Staphylococcus aureus infection
1e-07	3.48e-07	0.23	209209_s_at	FERMT2	fermitin family member 2	10979	AL031651	Hs.517033	Phospholipase C d1 in phospholipid associated cell signaling, Huntington's disease
< 1e-07	< 1e-07	0.069	223303_at	FERMT3	fermitin family member 3	83706	NM_014705	Hs.654652
2e-07	6.63e-07	0.19	205418_at	FES	FES proto-oncogene, tyrosine kinase	2242	AW006934	Hs.722350
< 1e-07	< 1e-07	0.13	1553906_s_at	FGD2	FYVE, RhoGEF and PH domain containing 2	221472	BE549732	Hs.726477
< 1e-07	< 1e-07	0.044	227811_at	FGD3	FYVE, RhoGEF and PH domain containing 3	89846	NM_004106	Hs.433300	Fc Epsilon Receptor I Signaling in Mast Cells, Asthma, Fc epsilon RI signaling pathway, Natural killer cell mediated cytotoxicity
6e-07	1.81e-06	0.19	238521_at	FGF12	fibroblast growth factor 12	2257	R62453	Hs.351413
< 1e-07	< 1e-07	0.1	223836_at	FGFBP2	fibroblast growth factor binding protein 2	83888	NM_018171	Hs.506603
< 1e-07	< 1e-07	0.032	219612_s_at	FGG	fibrinogen gamma chain	2266	BE138888	Hs.517601	Adherens junction, Axon guidance, B cell receptor signaling pathway, Chemokine signaling pathway, Colorectal cancer, Fc epsilon RI signaling pathway, Fc gamma R-mediated phagocytosis, Focal adhesion, Leukocyte transendothelial migration, MAPK signaling pathway, Natural killer cell mediated cytotoxicity, Pancreatic cancer, Pathways in cancer, Regulation of actin cytoskeleton, VEGF signaling pathwa…
< 1e-07	< 1e-07	0.005	227265_at	FGL2	fibrinogen-like 2	10875	NM_001343	Hs.696631	Endocytosis
< 1e-07	< 1e-07	0.0064	204834_at	FGL2	fibrinogen-like 2	10875	NM_001974	Hs.2375
< 1e-07	< 1e-07	0.025	208438_s_at	FGR	FGR proto-oncogene, Src family tyrosine kinase	2268	AI797043	Hs.520341
4.7e-06	1.13e-05	4.29	222843_at	FIGNL1	fidgetin-like 1	63979	NM_004509	Hs.145150
< 1e-07	3.48e-07	0.075	219118_at	FKBP11	FK506 binding protein 11, 19 kDa	51303	W46291	Hs.594351	Role of EGF Receptor Transactivation by GPCRs in Cardiac Hypertrophy
1e-07	3.48e-07	4.45	230728_at	FKBP14	FK506 binding protein 14, 22 kDa	55033	BE328402	Hs.636359
2.4e-06	6.2e-06	0.22	200709_at	FKBP1A	FK506 binding protein 1A, 12kDa	2280	AI697976	Hs.499042
1.5e-06	4.09e-06	0.16	204560_at	FKBP5	FK506 binding protein 5	2289	AV721177	Hs.163893	Endocytotic role of NDK, Phosphins and Dynamin
< 1e-07	< 1e-07	0.17	224856_at	FKBP5	FK506 binding protein 5	2289	BE566894	Hs.584864
1e-06	2.86e-06	7.97	241014_at	FLG-AS1	FLG antisense RNA 1	339400	AF349720	Hs.633653
< 1e-07	< 1e-07	0.017	204236_at	FLI1	Fli-1 proto-oncogene, ETS transcription factor	2313	BC022313	Hs.1908
1.53e-05	3.31e-05	0.17	213746_s_at	FLNA	filamin A, alpha	2316	NM_007282	Hs.12333
2.5e-06	6.43e-06	5.43	228191_at	FLVCR1	feline leukemia virus subgroup C cellular receptor 1	28982	NM_021242	Hs.522605
< 1e-07	< 1e-07	0.16	219316_s_at	FLVCR2	feline leukemia virus subgroup C cellular receptor family, member 2	55640	AA581439	Hs.155085
5e-07	1.53e-06	0.23	222866_s_at	FLVCR2	feline leukemia virus subgroup C cellular receptor family, member 2	55640	NM_007286	Hs.435228
0.0003935	0.00066	4.51	1558199_at	FN1	fibronectin 1	2335	BF591996	Hs.527295	Regulators of Bone Mineralization, Metabolic pathways, Nicotinate and nicotinamide metabolism, Pantothenate and CoA biosynthesis, Purine metabolism, Riboflavin metabolism, Starch and sucrose metabolism
< 1e-07	< 1e-07	0.0098	209189_at	FOS	FBJ murine osteosarcoma viral oncogene homolog	2353	NM_138557	Hs.174312	Amoebiasis, Chagas disease (American trypanosomiasis), Leishmaniasis, Malaria, Pathogenic Escherichia coli infection, Phagosome, Rheumatoid arthritis, Toll-like receptor signaling pathway, Toxoplasmosis
0.0008166	0.0013	4.6	1553613_s_at	FOXC1	forkhead box C1	2296	NM_004165	Hs.1027
< 1e-07	< 1e-07	8.07	220102_at	FOXL2	forkhead box L2	668	AW968823	Hs.368203
3.76e-05	7.57e-05	4.34	243278_at	FOXP2	forkhead box P2	93986	AL121895	Hs.437422	Tight junction
< 1e-07	< 1e-07	0.0083	205119_s_at	FPR1	formyl peptide receptor 1	2357	BE504180	Hs.744005
< 1e-07	3.48e-07	0.066	205118_at	FPR1	formyl peptide receptor 1	2357	NM_006186	Hs.563344
< 1e-07	< 1e-07	0.059	210772_at	FPR2	formyl peptide receptor 2	2358	AW189843	Hs.17518
< 1e-07	< 1e-07	0.09	210773_s_at	FPR2	formyl peptide receptor 2	2358	U82278	Hs.655593	Osteoclast differentiation
< 1e-07	< 1e-07	0.048	230422_at	FPR3	formyl peptide receptor 3	2359	AF153820	Hs.1547	Gastric acid secretion
0.0001071	0.000199	0.23	214560_at	FPR3	formyl peptide receptor 3	2359	AW665624	Hs.479766
< 1e-07	< 1e-07	0.2	219889_at	FRAT1	frequently rearranged in advanced T-cell lymphomas 1	10023	U90939	Hs.656750	Fc gamma R-mediated phagocytosis, Leishmaniasis, Osteoclast differentiation, Phagosome, Staphylococcus aureus infection, Systemic lupus erythematosus
< 1e-07	< 1e-07	0.12	209864_at	FRAT2	frequently rearranged in advanced T-cell lymphomas 2	23401	NM_016816	Hs.524760	Hepatitis C
< 1e-07	< 1e-07	6.42	230831_at	FRMD5	FERM domain containing 5	84978	BF512183	Hs.420229
0.0002137	0.000376	4.14	225481_at	FRMD6	FERM domain containing 6	122786	AA772172	Hs.15396
0.0008477	0.00135	5.17	201564_s_at	FSCN1	fascin actin-bundling protein 1	6624	AI659561	Hs.480938
3.8e-06	9.37e-06	0.1	207345_at	FST	follistatin	10468	NM_001767	Hs.523500	Dendritic cells in regulating TH1 and TH2 Development, IL 17 Signaling Pathway, NO2-dependent IL 12 Pathway in NK cells, Stathmin and breast cancer resistance to antimicrotubule agents, T Cytotoxic Cell Surface Molecules, T Helper Cell Surface Molecules, Cell adhesion molecules (CAMs), Hematopoietic cell lineage
9.3e-05	0.000175	0.22	204948_s_at	FST	follistatin	10468	NM_003761	Hs.714302	SNARE interactions in vesicular transport
3e-07	9.59e-07	6.08	226348_at	FUT11	fucosyltransferase 11 (alpha (1,3) fucosyltransferase)	170384	NM_020240	Hs.508829
< 1e-07	< 1e-07	0.097	218084_x_at	FXYD5	FXYD domain containing ion transport regulator 5	53827	AI452410	Hs.260074	Metabolic pathways, Steroid hormone biosynthesis
< 1e-07	< 1e-07	0.13	224252_s_at	FXYD5	FXYD domain containing ion transport regulator 5	53827	NM_018422	Hs.434255	Endocytosis
< 1e-07	< 1e-07	0.0048	227266_s_at	FYB	FYN binding protein	2533	AK002152	Hs.561815
< 1e-07	< 1e-07	0.023	211795_s_at	FYB	FYN binding protein	2533	BC005009	Hs.513491
< 1e-07	< 1e-07	0.19	211794_at	FYB	FYN binding protein	2533	NM_014776	Hs.434996	Agrin in Postsynaptic Differentiation, Endocytosis
2e-07	6.63e-07	0.2	224148_at	FYB	FYN binding protein	2533	NM_006561	Hs.309288
0.0001075	0.0002	0.23	205285_s_at	FYB	FYN binding protein	2533	NM_002198	Hs.436061	The information-processing pathway at the IFN-beta enhancer, Hepatitis C
< 1e-07	< 1e-07	6.09	227524_at	FZD3	frizzled class receptor 3	7976	AW070323	Hs.88297
3e-07	9.59e-07	6.46	219683_at	FZD3	frizzled class receptor 3	7976	AV715309	Hs.580681
< 1e-07	< 1e-07	11.55	239082_at	FZD3	frizzled class receptor 3	7976	NM_002104	Hs.277937
< 1e-07	< 1e-07	22.24	227499_at	FZD3	frizzled class receptor 3	7976	NM_000361	Hs.2030	Complement and coagulation cascades
< 1e-07	3.48e-07	5.51	221245_s_at	FZD5	frizzled class receptor 5	7855	NM_001945	Hs.799	NFAT and Hypertrophy of the heart (Transcription in the broken heart), Epithelial cell signaling in Helicobacter pylori infection, ErbB signaling pathway, GnRH signaling pathway
3.8e-06	9.37e-06	4.99	223254_s_at	G2E3	G2/M-phase specific E3 ubiquitin protein ligase	55632	BF058944	Hs.482587
0.0004277	0.000712	4.24	229114_at	GAB1	GRB2-associated binding protein 1	2549	AA744964	Hs.528826
5e-07	1.53e-06	0.25	228410_at	GAB3	GRB2-associated binding protein 3	139716	AW050627	Hs.602573
0.0003559	0.000601	4.17	235274_at	GABPB1-AS1	GABPB1 antisense RNA 1	100129387	AK025108	Hs.497893	Regulation of actin cytoskeleton
< 1e-07	3.48e-07	0.14	207574_s_at	GADD45B	growth arrest and DNA-damage-inducible, beta	4616	NM_016940	Hs.713123
8e-07	2.34e-06	0.17	209304_x_at	GADD45B	growth arrest and DNA-damage-inducible, beta	4616	AL157398	Hs.5025
< 1e-07	< 1e-07	4.47	201724_s_at	GALNT1	polypeptide N-acetylgalactosaminyltransferase 1	2589	NM_003841	Hs.655801	Apoptosis, Cytokine-cytokine receptor interaction, Natural killer cell mediated cytotoxicity
< 1e-07	< 1e-07	5.06	201722_s_at	GALNT1	polypeptide N-acetylgalactosaminyltransferase 1	2589	NM_004271	Hs.653138
< 1e-07	< 1e-07	14.78	1568618_a_at	GALNT1	polypeptide N-acetylgalactosaminyltransferase 1	2589	AI561354	Hs.481720	Fc gamma R-mediated phagocytosis
2.15e-05	4.5e-05	7.07	1554079_at	GALNT18	polypeptide N-acetylgalactosaminyltransferase 18	374378	AF134715	Hs.525157	TACI and BCMA stimulation of B cell immune responses., Cytokine-cytokine receptor interaction, Intestinal immune network for IgA production, Rheumatoid arthritis
1.5e-06	4.09e-06	0.17	211934_x_at	GANAB	glucosidase, alpha; neutral AB	23193	AW117368	Hs.434255	Endocytosis
0.0003564	0.000601	6.82	204471_at	GAP43	growth associated protein 43	2596	NM_016651	Hs.48950
5.9e-06	1.39e-05	0.1	204457_s_at	GAS1	growth arrest-specific 1	2619	BC035792	Hs.656318
< 1e-07	< 1e-07	0.12	202192_s_at	GAS7	growth arrest-specific 7	8522	NM_020474	Hs.514806	Metabolic pathways, Mucin type O-Glycan biosynthesis
< 1e-07	< 1e-07	0.15	211067_s_at	GAS7	growth arrest-specific 7	8522	AF129536	Hs.464419	Protein processing in endoplasmic reticulum
5e-07	1.53e-06	0.18	202191_s_at	GAS7	growth arrest-specific 7	8522	AL117515	Hs.741267
< 1e-07	< 1e-07	0.12	209604_s_at	GATA3	GATA binding protein 3	2625	AB020677	Hs.18166
3e-06	7.61e-06	0.17	202269_x_at	GBP1	guanylate binding protein 1, interferon-inducible	2633	AI703496	Hs.147381
1.7e-06	4.57e-06	0.19	231577_s_at	GBP1	guanylate binding protein 1, interferon-inducible	2633	H69701	Hs.596025
< 1e-07	< 1e-07	0.1	203765_at	GCA	grancalcin, EF-hand calcium binding protein	25801	AV700298	Hs.502328	Adhesion Molecules on Lymphocyte, Monocyte and its Surface Molecules, Neutrophil and Its Surface Molecules, ECM-receptor interaction, Hematopoietic cell lineage, Shigellosis
3.2e-06	8.06e-06	0.18	204224_s_at	GCH1	GTP cyclohydrolase 1	2643	NM_024717	Hs.591248
< 1e-07	< 1e-07	0.24	230788_at	GCNT2	glucosaminyl (N-acetyl) transferase 2, I-branching enzyme (I blood group)	2651	AF488803	Hs.656071
8.27e-05	0.000157	0.23	202593_s_at	GDE1	glycerophosphodiester phosphodiesterase 1	51573	X77598	Hs.125474
1e-07	3.48e-07	5.37	202722_s_at	GFPT1	glutamine--fructose-6-phosphate transaminase 1	2673	BC017314	Hs.369438	Keratinocyte Differentiation, METS affect on Macrophage Differentiation, Dorso-ventral axis formation, Pathways in cancer, Renal cell carcinoma
< 1e-07	< 1e-07	0.12	228376_at	GGTA1P	glycoprotein, alpha-galactosyltransferase 1 pseudogene	2681	AI741439	Hs.31961	Arrhythmogenic right ventricular cardiomyopathy (ARVC), Calcium signaling pathway, Cardiac muscle contraction, Dilated cardiomyopathy, Hypertrophic cardiomyopathy (HCM), Protein digestion and absorption
< 1e-07	< 1e-07	0.04	1552316_a_at	GIMAP1	GTPase, IMAP family member 1	170575	AF009643	Hs.631592	B cell receptor signaling pathway, Osteoclast differentiation
< 1e-07	< 1e-07	0.097	1552318_at	GIMAP1	GTPase, IMAP family member 1	170575	NM_018604	Hs.743224
< 1e-07	< 1e-07	0.058	232024_at	GIMAP2	GTPase, IMAP family member 2	26157	AB037730	Hs.348262	Ubiquitin mediated proteolysis
< 1e-07	< 1e-07	0.032	219243_at	GIMAP4	GTPase, IMAP family member 4	55303	AF226044	Hs.476052
< 1e-07	< 1e-07	0.021	219777_at	GIMAP6	GTPase, IMAP family member 6	474344	H16409	Hs.282151	Arrhythmogenic right ventricular cardiomyopathy (ARVC), Cardiac muscle contraction, Dilated cardiomyopathy, Hypertrophic cardiomyopathy (HCM), MAPK signaling pathway
< 1e-07	< 1e-07	0.043	229367_s_at	GIMAP6	GTPase, IMAP family member 6	474344	NM_002961	Hs.654444
< 1e-07	< 1e-07	0.062	228071_at	GIMAP7	GTPase, IMAP family member 7	168537	U76542	Hs.500645	Arginine and proline metabolism, Metabolic pathways
< 1e-07	< 1e-07	0.067	235306_at	GIMAP8	GTPase, IMAP family member 8	155038	AL832042	Hs.127022
< 1e-07	< 1e-07	0.19	204982_at	GIT2	G protein-coupled receptor kinase interacting ArfGAP 2	9815	AV692127	Hs.514806	Metabolic pathways, Mucin type O-Glycan biosynthesis
< 1e-07	< 1e-07	0.1	207387_s_at	GK	glycerol kinase	2710	NM_017719	Hs.476052
< 1e-07	< 1e-07	0.054	225604_s_at	GLIPR2	GLI pathogenesis-related 2	152007	AI125308	Hs.667175
8.6e-06	1.94e-05	0.24	225602_at	GLIPR2	GLI pathogenesis-related 2	152007	NM_005746	Hs.489615	Nicotinate and nicotinamide metabolism
< 1e-07	< 1e-07	4.1	223378_at	GLIS2	GLIS family zinc finger 2	84662	N93191	Hs.26216
1e-07	3.48e-07	5.35	205280_at	GLRB	glycine receptor, beta	2743	BE646398	Hs.37617
< 1e-07	< 1e-07	5.92	203159_at	GLS	glutaminase	2744	W86302	Hs.407190
< 1e-07	< 1e-07	0.077	229770_at	GLT1D1	glycosyltransferase 1 domain containing 1	144423	NM_022154	Hs.288034
< 1e-07	< 1e-07	0.039	200648_s_at	GLUL	glutamate-ammonia ligase	2752	AA746320	Hs.184492	VEGF, Hypoxia, and Angiogenesis
< 1e-07	< 1e-07	0.074	217202_s_at	GLUL	glutamate-ammonia ligase	2752	BC001903	Hs.654593	IL-10 Anti-inflammatory Signaling Pathway, Cytokine-cytokine receptor interaction, Jak-STAT signaling pathway, Toxoplasmosis
< 1e-07	< 1e-07	0.19	242281_at	GLUL	glutamate-ammonia ligase	2752	AA643687	Hs.535966
< 1e-07	< 1e-07	0.02	204220_at	GMFG	glia maturation factor, gamma	9535	NM_004350	Hs.170019
< 1e-07	< 1e-07	7.9	218350_s_at	GMNN	geminin, DNA replication inhibitor	51053	AI953847	Hs.148741
2.3e-06	5.97e-06	0.21	214157_at	GNAS	GNAS complex locus	2778	NM_022162	Hs.592072	NOD-like receptor signaling pathway, Shigellosis
2e-07	6.63e-07	6.55	222834_s_at	GNG12	guanine nucleotide binding protein (G protein), gamma 12	55970	S77154	Hs.563344
< 1e-07	< 1e-07	0.042	224964_s_at	GNG2	guanine nucleotide binding protein (G protein), gamma 2	54331	AW025529	Hs.709550
0.0008293	0.00132	0.18	37145_at	GNLY	granulysin	10578	AB017493	Hs.4055
1e-07	3.48e-07	4	217771_at	GOLM1	golgi membrane protein 1	51280	AB040120	Hs.288034
3e-07	9.59e-07	9.32	236862_at	GOPC	golgi-associated PDZ and coiled-coil motif containing	57120	NM_002661	Hs.372303	B cell receptor signaling pathway, Calcium signaling pathway, Epithelial cell signaling in Helicobacter pylori infection, ErbB signaling pathway, Fc epsilon RI signaling pathway, Fc gamma R-mediated phagocytosis, Glioma, Inositol phosphate metabolism, Leukocyte transendothelial migration, Metabolic pathways, Natural killer cell mediated cytotoxicity, Neurotrophin signaling pathway, Non-small cell…
< 1e-07	< 1e-07	0.15	230492_s_at	GPCPD1	glycerophosphocholine phosphodiesterase GDE1 homolog (S. cerevisiae)	56261	AL139228	Hs.522736
< 1e-07	< 1e-07	0.018	201141_at	GPNMB	glycoprotein (transmembrane) nmb	10457	AI079327	Hs.248156	Cytokine-cytokine receptor interaction, Jak-STAT signaling pathway
0.0001027	0.000192	0.19	1554018_at	GPNMB	glycoprotein (transmembrane) nmb	10457	BE549540	Hs.733809	Eicosanoid Metabolism, Calcium signaling pathway, Neuroactive ligand-receptor interaction
2.19e-05	4.59e-05	14.16	232195_at	GPR158	G protein-coupled receptor 158	57512	AI632216	Hs.436271	B cell receptor signaling pathway
< 1e-07	< 1e-07	0.13	210279_at	GPR18	G protein-coupled receptor 18	2841	BE207758	Hs.503284	Attenuation of GPCR Signaling, b-arrestins in GPCR Desensitization, Role of b-arrestins in the activation and targeting of MAP kinases, Roles of b-arrestin-dependent Recruitment of Src Kinases in GPCR Signaling, Chemokine signaling pathway, Endocytosis, MAPK signaling pathway, Phototransduction
< 1e-07	< 1e-07	0.079	223620_at	GPR34	G protein-coupled receptor 34	2857	NM_001785	Hs.466910	Drug metabolism - other enzymes, Metabolic pathways, Pyrimidine metabolism
1e-07	3.48e-07	0.11	223767_at	GPR84	G protein-coupled receptor 84	53831	AL571375	Hs.379191	Biosynthesis of unsaturated fatty acids, PPAR signaling pathway
8e-07	2.34e-06	6.45	203632_s_at	GPRC5B	G protein-coupled receptor, class C, group 5, member B	51704	NM_014905	Hs.116448	Alanine, aspartate and glutamate metabolism, Arginine and proline metabolism, D-Glutamine and D-glutamate metabolism, Metabolic pathways, Nitrogen metabolism, Proximal tubule bicarbonate reclamation
< 1e-07	< 1e-07	0.055	204265_s_at	GPSM3	G-protein signaling modulator 3	63940	BC006471	Hs.75823
1e-07	3.48e-07	5.72	227628_at	GPX8	glutathione peroxidase 8 (putative)	493869	AI754404	Hs.477866	Lysine degradation
< 1e-07	< 1e-07	11.05	228141_at	GPX8	glutathione peroxidase 8 (putative)	493869	BF363430	Hs.304475	Fc epsilon RI signaling pathway, Natural killer cell mediated cytotoxicity, Osteoclast differentiation, T cell receptor signaling pathway
9.99e-05	0.000187	4.1	209409_at	GRB10	growth factor receptor-bound protein 10	2887	U65590	Hs.81134	Signal transduction through IL1R
1.18e-05	2.6e-05	23.48	218468_s_at	GREM1	gremlin 1, DAN family BMP antagonist	26585	NM_015310	Hs.434255	Endocytosis
2.7e-06	6.91e-06	34.36	218469_at	GREM1	gremlin 1, DAN family BMP antagonist	26585	AL031602	Hs.591504
0.0006454	0.00105	0.25	216041_x_at	GRN	granulin	2896	AI493245	Hs.502328	Adhesion Molecules on Lymphocyte, Monocyte and its Surface Molecules, Neutrophil and Its Surface Molecules, ECM-receptor interaction, Hematopoietic cell lineage, Shigellosis
2e-07	6.63e-07	0.24	234975_at	GSPT1	G1 to S phase transition 1	2935	NM_012417	Hs.591185
< 1e-07	< 1e-07	11.28	222102_at	GSTA3	glutathione S-transferase alpha 3	2940	BF437161	Hs.40735	Basal cell carcinoma, Melanogenesis, Pathways in cancer, Wnt signaling pathway
9.3e-06	2.09e-05	6.62	242342_at	GUCY1A2	guanylate cyclase 1, soluble, alpha 2	2977	AL110191	Hs.522074
8e-07	2.34e-06	10.51	228731_at	GUCY1A2	guanylate cyclase 1, soluble, alpha 2	2977	AW043921	Hs.710275	Other types of O-glycan biosynthesis
< 1e-07	3.48e-07	12.9	236335_at	GUCY1A2	guanylate cyclase 1, soluble, alpha 2	2977	AW188198	Hs.437322
< 1e-07	< 1e-07	8.79	235733_at	GXYLT2	glucoside xylosyltransferase 2	727936	NM_024582	Hs.563205
< 1e-07	< 1e-07	11.46	235371_at	GXYLT2	glucoside xylosyltransferase 2	727936	AW593996	Hs.132441
< 1e-07	< 1e-07	0.11	202947_s_at	GYPC	glycophorin C (Gerbich blood group)	2995	AF005774	Hs.390736	FAS signaling pathway ( CD95 ), HIV-I Nef: negative effector of Fas and TNF, IL-2 Receptor Beta Chain in T cell Activation, Induction of apoptosis through DR3 and DR4/5 Death Receptors , Apoptosis, Chagas disease (American trypanosomiasis)
< 1e-07	< 1e-07	0.11	210321_at	GZMH	granzyme H (cathepsin G-like 2, protein h-CCPX)	2999	N21138	Hs.445030
< 1e-07	< 1e-07	0.14	206666_at	GZMK	granzyme K (granzyme 3; tryptase II)	3003	BF981280	Hs.632486
1.29e-05	2.82e-05	4.07	227741_at	HACD2	3-hydroxyacyl-CoA dehydratase 2	201562	AI299239	Hs.147635	Phagosome
7e-07	2.07e-06	0.14	244050_at	HACD4	3-hydroxyacyl-CoA dehydratase 4	401494	AI301948	Hs.576612	Purine metabolism, Pyrimidine metabolism
1.1e-06	3.1e-06	4.9	205524_s_at	HAPLN1	hyaluronan and proteoglycan link protein 1	1404	NM_014076	Hs.383403
1.1e-06	3.1e-06	10.9	230895_at	HAPLN1	hyaluronan and proteoglycan link protein 1	1404	AK025637	Hs.656902	ADP-Ribosylation Factor
< 1e-07	< 1e-07	17.21	230204_at	HAPLN1	hyaluronan and proteoglycan link protein 1	1404	AI343467	Hs.583348	Cytokine-cytokine receptor interaction, TGF-beta signaling pathway
3e-07	9.59e-07	29.24	205523_at	HAPLN1	hyaluronan and proteoglycan link protein 1	1404	NM_002101	Hs.59138	Malaria
< 1e-07	< 1e-07	0.05	235458_at	HAVCR2	hepatitis A virus cellular receptor 2	84868	AI983505	Hs.209431
2e-07	6.63e-07	0.025	206834_at	HBD	hemoglobin, delta	3045	AL359571	Hs.310429
< 1e-07	< 1e-07	0.058	203821_at	HBEGF	heparin-binding EGF-like growth factor	1839	NM_020987	Hs.499725
1e-07	3.48e-07	0.072	38037_at	HBEGF	heparin-binding EGF-like growth factor	1839	NM_022127	Hs.535966
< 1e-07	< 1e-07	0.036	240336_at	HBM	hemoglobin, mu	3042	AA633203	Hs.546467
7.92e-05	0.000151	0.14	220807_at	HBQ1	hemoglobin, theta 1	3049	NM_023067	Hs.289292
< 1e-07	< 1e-07	0.024	205220_at	HCAR3	hydroxycarboxylic acid receptor 3	8843	NM_003879	Hs.390736	FAS signaling pathway ( CD95 ), HIV-I Nef: negative effector of Fas and TNF, IL-2 Receptor Beta Chain in T cell Activation, Induction of apoptosis through DR3 and DR4/5 Death Receptors , Apoptosis, Chagas disease (American trypanosomiasis)
< 1e-07	< 1e-07	0.013	208018_s_at	HCK	HCK proto-oncogene, Src family tyrosine kinase	3055	NM_005479	Hs.126057	WNT Signaling Pathway, Wnt signaling pathway
< 1e-07	< 1e-07	0.012	202957_at	HCLS1	hematopoietic cell-specific Lyn substrate 1	3059	AF267866	Hs.449628
2.7e-06	6.91e-06	0.16	223640_at	HCST	hematopoietic cell signal transducer	10870	AU143929	Hs.352591
< 1e-07	< 1e-07	0.15	230529_at	HECA	headcase homolog (Drosophila)	51696	AI524138	Hs.485360
< 1e-07	< 1e-07	0.12	1552628_a_at	HERPUD2	HERPUD family member 2	64224	AU135154	Hs.172028	Generation of amyloid b-peptide by PS1, Alzheimer's disease, Epithelial cell signaling in Helicobacter pylori infection
< 1e-07	< 1e-07	0.14	210997_at	HGF	hepatocyte growth factor (hepapoietin A; scatter factor)	3082	NM_005990	Hs.744005
< 1e-07	< 1e-07	0.078	215933_s_at	HHEX	hematopoietically expressed homeobox	3087	NM_003340	Hs.518773	Protein processing in endoplasmic reticulum, Ubiquitin mediated proteolysis
2e-07	6.63e-07	0.17	204689_at	HHEX	hematopoietically expressed homeobox	3087	AF278532	Hs.201034	Axon guidance
2.82e-05	5.79e-05	5.48	242317_at	HIGD1A	HIG1 hypoxia inducible domain family, member 1A	25994	BC018764	Hs.445885
5.25e-05	0.000103	0.22	1554452_a_at	HILPDA	hypoxia inducible lipid droplet-associated	29923	BF439533	Hs.741465
< 1e-07	< 1e-07	6.25	202934_at	HK2	hexokinase 2	3099	AI761561	Hs.406266	Amino sugar and nucleotide sugar metabolism, Butirosin and neomycin biosynthesis, Carbohydrate digestion and absorption, Fructose and mannose metabolism, Galactose metabolism, Glycolysis / Gluconeogenesis, Insulin signaling pathway, Metabolic pathways, Starch and sucrose metabolism, Type II diabetes mellitus
8.92e-05	0.000168	0.2	217478_s_at	HLA-DMA	major histocompatibility complex, class II, DM alpha	3108	AW268357	Hs.132868
4.7e-06	1.13e-05	0.19	203932_at	HLA-DMB	major histocompatibility complex, class II, DM beta	3109	BF433725	Hs.472838	MAPK signaling pathway, Non-small cell lung cancer, Pathways in cancer
< 1e-07	3.48e-07	0.059	211991_s_at	HLA-DPA1	major histocompatibility complex, class II, DP alpha 1	3113	NM_005890	Hs.462214
1.7e-06	4.57e-06	0.14	211990_at	HLA-DPA1	major histocompatibility complex, class II, DP alpha 1	3113	AI986192	Hs.104879	Amoebiasis
< 1e-07	< 1e-07	0.081	201137_s_at	HLA-DPB1	major histocompatibility complex, class II, DP beta 1	3115	AF009635	Hs.631592	B cell receptor signaling pathway, Osteoclast differentiation
0.0003015	0.000517	0.11	213831_at	HLA-DQA1	major histocompatibility complex, class II, DQ alpha 1	3117	AA603344	Hs.580681
5.47e-05	0.000107	0.18	236203_at	HLA-DQA1	major histocompatibility complex, class II, DQ alpha 1	3117	AF015451	Hs.390736	FAS signaling pathway ( CD95 ), HIV-I Nef: negative effector of Fas and TNF, IL-2 Receptor Beta Chain in T cell Activation, Induction of apoptosis through DR3 and DR4/5 Death Receptors , Apoptosis, Chagas disease (American trypanosomiasis)
2e-05	4.22e-05	0.13	212998_x_at	HLA-DQB1	major histocompatibility complex, class II, DQ beta 1	3119	M93255	Hs.504281
4.3e-06	1.05e-05	0.2	211654_x_at	HLA-DQB1	major histocompatibility complex, class II, DQ beta 1	3119	AU144892	Hs.438709
8.2e-06	1.86e-05	0.14	208894_at	HLA-DRA	major histocompatibility complex, class II, DR alpha	3122	NM_002619	Hs.81564	Chemokine signaling pathway, Cytokine-cytokine receptor interaction
1.65e-05	3.54e-05	0.17	210982_s_at	HLA-DRA	major histocompatibility complex, class II, DR alpha	3122	AI432713	Hs.334019	B Lymphocyte Cell Surface Molecules, Complement and coagulation cascades, Hematopoietic cell lineage, Leishmaniasis, Malaria
< 1e-07	< 1e-07	0.2	200904_at	HLA-E	major histocompatibility complex, class I, E	3133	BF059748	Hs.519884	Glycosphingolipid biosynthesis - lacto and neolacto series, Metabolic pathways
< 1e-07	< 1e-07	0.23	214438_at	HLX	H2.0-like homeobox	3142	AA775681	Hs.647659
< 1e-07	< 1e-07	116.74	235944_at	HMCN1	hemicentin 1	83872	BC038440	Hs.514806	Metabolic pathways, Mucin type O-Glycan biosynthesis
< 1e-07	< 1e-07	12.9	208025_s_at	HMGA2	high mobility group AT-hook 2	8091	NM_000633	Hs.150749	Apoptotic Signaling in Response to DNA Damage, Ceramide Signaling Pathway, HIV-I Nef: negative effector of Fas and TNF, IL-2 Receptor Beta Chain in T cell Activation, IL-7 Signal Transduction, Induction of apoptosis through DR3 and DR4/5 Death Receptors , Keratinocyte Differentiation, Melanocyte Development and Pigmentation Pathway, p53 Signaling Pathway, Prion Pathway, Regulation of BAD phosphor…
1.84e-05	3.91e-05	0.12	205822_s_at	HMGCS1	3-hydroxy-3-methylglutaryl-CoA synthase 1 (soluble)	3157	BE613133	Hs.201978	Aspirin Blocks Signaling Pathway Involved in Platelet Activation, Eicosanoid Metabolism, Mechanism of Acetaminophen Activity and Toxicity, Arachidonic acid metabolism, Metabolic pathways
< 1e-07	< 1e-07	0.073	212873_at	HMHA1	histocompatibility (minor) HA-1	23526	NM_025195	Hs.444947
< 1e-07	< 1e-07	0.15	203665_at	HMOX1	heme oxygenase (decycling) 1	3162	NM_024901	Hs.557850
< 1e-07	< 1e-07	0.21	228642_at	HOTAIRM1	HOXA transcript antisense RNA, myeloid-specific 1	100506311	NM_024318	Hs.688335	Osteoclast differentiation
5e-07	1.53e-06	7.42	206858_s_at	HOXC6	homeobox C6	3223	NM_024554	Hs.520463
0.0001121	0.000208	0.24	203914_x_at	HPGD	hydroxyprostaglandin dehydrogenase 15-(NAD)	3248	AI266750	Hs.143250	ECM-receptor interaction, Focal adhesion
0.0001061	0.000198	0.24	211548_s_at	HPGD	hydroxyprostaglandin dehydrogenase 15-(NAD)	3248	NM_006665	Hs.44227	Glycosaminoglycan degradation, Metabolic pathways
4.6e-06	1.11e-05	4.42	227139_s_at	HPS3	Hermansky-Pudlak syndrome 3	84343	AU152505	Hs.138211	Agrin in Postsynaptic Differentiation, Angiotensin II mediated activation of JNK Pathway via Pyk2 dependent signaling, ATM Signaling Pathway, BCR Signaling Pathway, Bioactive Peptide Induced Signaling Pathway, Bone Remodelling, Ceramide Signaling Pathway, EGF Signaling Pathway, EPO Signaling Pathway, FAS signaling pathway ( CD95 ), Fc Epsilon Receptor I Signaling in Mast Cells, HIV-I Nef: negativ…
< 1e-07	< 1e-07	0.2	219403_s_at	HPSE	heparanase	10855	AB035482	Hs.10649
1e-07	3.48e-07	0.2	222881_at	HPSE	heparanase	10855	NM_016230	Hs.5741
1e-07	3.48e-07	0.086	205466_s_at	HS3ST1	heparan sulfate (glucosamine) 3-O-sulfotransferase 1	9957	AI754693	Hs.116471
1e-07	3.48e-07	8.84	219985_at	HS3ST3A1	heparan sulfate (glucosamine) 3-O-sulfotransferase 3A1	9955	AL516854	Hs.150580	Eukaryotic protein translation, VEGF, Hypoxia, and Angiogenesis, RNA transport
1.9e-06	5.04e-06	6.66	227361_at	HS3ST3B1	heparan sulfate (glucosamine) 3-O-sulfotransferase 3B1	9953	AF177940	Hs.333418
4.8e-06	1.16e-05	4.34	1552767_a_at	HS6ST2	heparan sulfate 6-O-sulfotransferase 2	90161	NM_000732	Hs.504048	Activation of Csk by cAMP-dependent Protein Kinase Inhibits Signaling through the T Cell Receptor, CTL mediated immune response against target cells , HIV Induced T Cell Apoptosis, IL 17 Signaling Pathway, IL12 and Stat4 Dependent Signaling Pathway in Th1 Development, Lck and Fyn tyrosine kinases in initiation of TCR Activation, NO2-dependent IL 12 Pathway in NK cells, Role of Tob in T-cell activ…
2.2e-06	5.73e-06	4.12	223248_at	HSDL1	hydroxysteroid dehydrogenase like 1	83693	AA722878	Hs.433422
< 1e-07	< 1e-07	13.56	208814_at	HSPA4	heat shock 70kDa protein 4	3308	NM_000935	Hs.477866	Lysine degradation
< 1e-07	< 1e-07	0.019	213418_at	HSPA6	heat shock 70kDa protein 6 (HSP70B')	3310	X56841	Hs.650174	Allograft rejection, Antigen processing and presentation, Autoimmune thyroid disease, Cell adhesion molecules (CAMs), Endocytosis, Graft-versus-host disease, Natural killer cell mediated cytotoxicity, Phagosome, Type I diabetes mellitus, Viral myocarditis
< 1e-07	< 1e-07	0.1	117_at	HSPA6	heat shock 70kDa protein 6 (HSP70B')	3310	AI807482	Hs.243596
< 1e-07	< 1e-07	4.64	236281_x_at	HTR7	5-hydroxytryptamine (serotonin) receptor 7, adenylate cyclase-coupled	3363	NM_014210	Hs.591198
< 1e-07	< 1e-07	17.73	201185_at	HTRA1	HtrA serine peptidase 1	5654	NM_020169	Hs.478067
< 1e-07	3.48e-07	0.25	226879_at	HVCN1	hydrogen voltage gated channel 1	84329	AF009616	Hs.390736	FAS signaling pathway ( CD95 ), HIV-I Nef: negative effector of Fas and TNF, IL-2 Receptor Beta Chain in T cell Activation, Induction of apoptosis through DR3 and DR4/5 Death Receptors , Apoptosis, Chagas disease (American trypanosomiasis)
3.4e-06	8.49e-06	0.22	202637_s_at	ICAM1	intercellular adhesion molecule 1	3383	NM_002621	Hs.53155	Alternative Complement Pathway
< 1e-07	< 1e-07	0.09	204949_at	ICAM3	intercellular adhesion molecule 3	3385	AW293276	Hs.443057
5.83e-05	0.000114	0.11	201565_s_at	ID2	inhibitor of DNA binding 2, dominant negative helix-loop-helix protein	3398	AL023653	Hs.61469
5e-05	9.87e-05	0.14	201566_x_at	ID2	inhibitor of DNA binding 2, dominant negative helix-loop-helix protein	3398	AI692659	Hs.436023
0.0003396	0.000575	0.14	226933_s_at	ID4	inhibitor of DNA binding 4, dominant negative helix-loop-helix protein	3400	NM_052884	Hs.661852
0.0001288	0.000236	0.16	209293_x_at	ID4	inhibitor of DNA binding 4, dominant negative helix-loop-helix protein	3400	AF051151	Hs.604542	Pathogenic Escherichia coli infection, Toll-like receptor signaling pathway
< 1e-07	< 1e-07	0.13	202081_at	IER2	immediate early response 2	9592	AW471220	Hs.406096
6.5e-06	1.52e-05	0.16	204439_at	IFI44L	interferon-induced protein 44-like	10964	NM_000579	Hs.450802	HIV Induced T Cell Apoptosis, IL12 and Stat4 Dependent Signaling Pathway in Th1 Development, NO2-dependent IL 12 Pathway in NK cells, Pertussis toxin-insensitive CCR5 Signaling in Macrophage, Selective expression of chemokine receptors during T-cell polarization, Chemokine signaling pathway, Cytokine-cytokine receptor interaction, Endocytosis, Toxoplasmosis
< 1e-07	< 1e-07	0.055	203153_at	IFIT1	interferon-induced protein with tetratricopeptide repeats 1	3434	NM_025201	Hs.709337	Cytokine-cytokine receptor interaction
< 1e-07	< 1e-07	0.049	226757_at	IFIT2	interferon-induced protein with tetratricopeptide repeats 2	3433	NM_003633	Hs.104925
1e-07	3.48e-07	0.12	229450_at	IFIT3	interferon-induced protein with tetratricopeptide repeats 3	3437	NM_012198	Hs.377894
9.66e-05	0.000182	0.19	204747_at	IFIT3	interferon-induced protein with tetratricopeptide repeats 3	3437	NM_020240	Hs.508829
< 1e-07	< 1e-07	0.066	214022_s_at	IFITM1	interferon induced transmembrane protein 1	8519	BF575514	Hs.489615	Nicotinate and nicotinamide metabolism
< 1e-07	< 1e-07	0.15	211676_s_at	IFNGR1	interferon gamma receptor 1	3459	AF017987	Hs.213424	Wnt signaling pathway
3.8e-06	9.37e-06	0.19	230048_at	IFRD1	interferon-related developmental regulator 1	3475	NM_002971	Hs.517717
< 1e-07	< 1e-07	12.87	227870_at	IGDCC4	immunoglobulin superfamily, DCC subclass, member 4	57722	BF432625	Hs.427284
3.9e-06	9.59e-06	0.089	202718_at	IGFBP2	insulin-like growth factor binding protein 2, 36kDa	3485	U81380	Hs.496646	Cytokine-cytokine receptor interaction, Jak-STAT signaling pathway
8e-06	1.83e-05	6.77	210095_s_at	IGFBP3	insulin-like growth factor binding protein 3	3486	NM_000014	Hs.212838	Complement and coagulation cascades
1e-07	3.48e-07	8.89	211959_at	IGFBP5	insulin-like growth factor binding protein 5	3488	NM_022743	Hs.567571
< 1e-07	3.48e-07	11.02	203424_s_at	IGFBP5	insulin-like growth factor binding protein 5	3488	NM_016610	Hs.660543	Toll-like receptor signaling pathway
< 1e-07	< 1e-07	0.019	227346_at	IKZF1	IKAROS family zinc finger 1 (Ikaros)	10320	AA705182	Hs.592087
8e-07	2.34e-06	0.18	220704_at	IKZF1	IKAROS family zinc finger 1 (Ikaros)	10320	NM_024089	Hs.408629
< 1e-07	< 1e-07	0.25	205038_at	IKZF1	IKAROS family zinc finger 1 (Ikaros)	10320	AW119113	Hs.2030	Complement and coagulation cascades
< 1e-07	< 1e-07	0.2	209575_at	IL10RB	interleukin 10 receptor, beta	3588	NM_004536	Hs.654500	NOD-like receptor signaling pathway
< 1e-07	< 1e-07	0.19	1552584_at	IL12RB1	interleukin 12 receptor, beta 1	3594	BF446719	Hs.128067
< 1e-07	< 1e-07	0.18	210904_s_at	IL13RA1	interleukin 13 receptor, alpha 1	3597	AF498927	Hs.504877	Caspase Cascade in Apoptosis, D4-GDI Signaling Pathway, FAS signaling pathway ( CD95 ), HIV-I Nef: negative effector of Fas and TNF, TNFR1 Signaling Pathway, Neurotrophin signaling pathway, Vasopressin-regulated water reabsorption
< 1e-07	3.48e-07	0.22	211612_s_at	IL13RA1	interleukin 13 receptor, alpha 1	3597	AF056979	Hs.520414	Chaperones modulate interferon Signaling Pathway, IFN gamma signaling pathway , Selective expression of chemokine receptors during T-cell polarization, Th1/Th2 Differentiation, Chagas disease (American trypanosomiasis), Cytokine-cytokine receptor interaction, Jak-STAT signaling pathway, Leishmaniasis, Natural killer cell mediated cytotoxicity, Osteoclast differentiation, Toxoplasmosis
< 1e-07	< 1e-07	0.16	209827_s_at	IL16	interleukin 16	3603	AF247167	Hs.44004
1e-07	3.48e-07	5.57	227997_at	IL17RD	interleukin 17 receptor D	54756	NM_003248	Hs.211426	ECM-receptor interaction, Focal adhesion, Malaria, Phagosome, TGF-beta signaling pathway
< 1e-07	< 1e-07	0.19	206295_at	IL18	interleukin 18	3606	BF512748	Hs.515247	IL 2 signaling pathway, IL 4 signaling pathway, IL 6 signaling pathway, IL-2 Receptor Beta Chain in T cell Activation, IL22 Soluble Receptor Signaling Pathway , IL-7 Signal Transduction, Stat3 Signaling Pathway, Chemokine signaling pathway, Jak-STAT signaling pathway, Primary immunodeficiency
< 1e-07	< 1e-07	0.052	207072_at	IL18RAP	interleukin 18 receptor accessory protein	8807	AA420614	Hs.710780
< 1e-07	< 1e-07	0.047	39402_at	IL1B	interleukin 1, beta	3553	AF041459	Hs.390736	FAS signaling pathway ( CD95 ), HIV-I Nef: negative effector of Fas and TNF, IL-2 Receptor Beta Chain in T cell Activation, Induction of apoptosis through DR3 and DR4/5 Death Receptors , Apoptosis, Chagas disease (American trypanosomiasis)
< 1e-07	3.48e-07	0.06	205067_at	IL1B	interleukin 1, beta	3553	BF696304	Hs.408355
< 1e-07	< 1e-07	0.052	205403_at	IL1R2	interleukin 1 receptor, type II	7850	NM_138810	Hs.529984
< 1e-07	< 1e-07	0.13	211372_s_at	IL1R2	interleukin 1 receptor, type II	7850	BC005169	Hs.471768
< 1e-07	< 1e-07	0.036	212657_s_at	IL1RN	interleukin 1 receptor antagonist	3557	AL556611	Hs.196983
< 1e-07	< 1e-07	0.18	205291_at	IL2RB	interleukin 2 receptor, beta	3560	AV733950	Hs.326035	Phosphorylation of MEK1 by cdk5/p35 down regulates the MAP kinase pathway, Prion diseases
5e-07	1.53e-06	0.14	204116_at	IL2RG	interleukin 2 receptor, gamma	3561	NM_002775	Hs.501280
1.1e-06	3.1e-06	4.23	229025_s_at	IMMP1L	IMP1 inner mitochondrial membrane peptidase-like (S. cerevisiae)	196294	BC005297	Hs.731056	Metabolic pathways, Tryptophan metabolism
< 1e-07	< 1e-07	0.059	203126_at	IMPA2	inositol(myo)-1(or 4)-monophosphatase 2	3613	NM_016523	Hs.183125
< 1e-07	< 1e-07	12.69	210511_s_at	INHBA	inhibin, beta A	3624	NM_022373	Hs.643051
< 1e-07	< 1e-07	13.03	227140_at	INHBA	inhibin, beta A	3624	AI370364	Hs.592102
< 1e-07	< 1e-07	0.13	203332_s_at	INPP5D	inositol polyphosphate-5-phosphatase, 145kDa	3635	NM_006343	Hs.306178
4e-07	1.25e-06	6.01	209566_at	INSIG2	insulin induced gene 2	51141	AF141304	Hs.650382	Amoebiasis, Endocytosis, Phagosome, Vasopressin-regulated water reabsorption
0.0007078	0.00114	3.44	213792_s_at	INSR	insulin receptor	3643	AA886335	Hs.709550
< 1e-07	< 1e-07	0.15	214735_at	IPCEF1	interaction protein for cytohesin exchange factors 1	26034	NM_020249	Hs.656071
< 1e-07	< 1e-07	0.087	203474_at	IQGAP2	IQ motif containing GTPase activating protein 2	10788	AW663908	Hs.654387
< 1e-07	< 1e-07	0.053	213817_at	IRAK3	interleukin-1 receptor-associated kinase 3	11213	AI446414	Hs.1048	CDK Regulation of DNA Replication, Erythrocyte Differentiation Pathway, IL 17 Signaling Pathway, Melanocyte Development and Pigmentation Pathway, Regulation of BAD phosphorylation, Cytokine-cytokine receptor interaction, Hematopoietic cell lineage, Melanogenesis, Pathways in cancer
< 1e-07	< 1e-07	0.12	220034_at	IRAK3	interleukin-1 receptor-associated kinase 3	11213	NM_004848	Hs.10649
< 1e-07	< 1e-07	0.1	238725_at	IRF1	interferon regulatory factor 1	3659	AF354928	Hs.325960
< 1e-07	< 1e-07	0.17	202531_at	IRF1	interferon regulatory factor 1	3659	U82819	Hs.80658
< 1e-07	< 1e-07	0.098	208436_s_at	IRF7	interferon regulatory factor 7	3665	NM_002121	Hs.485130	Allograft rejection, Antigen processing and presentation, Asthma, Autoimmune thyroid disease, Cell adhesion molecules (CAMs), Graft-versus-host disease, Intestinal immune network for IgA production, Leishmaniasis, Phagosome, Rheumatoid arthritis, Staphylococcus aureus infection, Systemic lupus erythematosus, Toxoplasmosis, Type I diabetes mellitus, Viral myocarditis
< 1e-07	< 1e-07	0.089	204057_at	IRF8	interferon regulatory factor 8	3394	Z22970	Hs.504641
< 1e-07	< 1e-07	0.12	203882_at	IRF9	interferon regulatory factor 9	10379	NM_000700	Hs.494173	Corticosteroids and cardioprotection
1.1e-06	3.1e-06	6.78	204686_at	IRS1	insulin receptor substrate 1	3667	AV713720	Hs.436066
1.29e-05	2.82e-05	7.83	242979_at	IRS1	insulin receptor substrate 1	3667	AB026043	Hs.530735
2e-07	6.63e-07	0.15	209184_s_at	IRS2	insulin receptor substrate 2	8660	AL552534	Hs.502328	Adhesion Molecules on Lymphocyte, Monocyte and its Surface Molecules, Neutrophil and Its Surface Molecules, ECM-receptor interaction, Hematopoietic cell lineage, Shigellosis
1.34e-05	2.92e-05	0.21	209185_s_at	IRS2	insulin receptor substrate 2	8660	H23209	Hs.31961	Arrhythmogenic right ventricular cardiomyopathy (ARVC), Calcium signaling pathway, Cardiac muscle contraction, Dilated cardiomyopathy, Hypertrophic cardiomyopathy (HCM), Protein digestion and absorption
3.21e-05	6.53e-05	0.19	205483_s_at	ISG15	ISG15 ubiquitin-like modifier	9636	D26054	Hs.494496	Fructose and mannose metabolism, Glycolysis / Gluconeogenesis, Insulin signaling pathway, Metabolic pathways, Pentose phosphate pathway
< 1e-07	< 1e-07	0.099	204698_at	ISG20	interferon stimulated exonuclease gene 20kDa	3669	NM_000416	Hs.520414	Chaperones modulate interferon Signaling Pathway, IFN gamma signaling pathway , Selective expression of chemokine receptors during T-cell polarization, Th1/Th2 Differentiation, Chagas disease (American trypanosomiasis), Cytokine-cytokine receptor interaction, Jak-STAT signaling pathway, Leishmaniasis, Natural killer cell mediated cytotoxicity, Osteoclast differentiation, Toxoplasmosis
< 1e-07	3.48e-07	0.19	33304_at	ISG20	interferon stimulated exonuclease gene 20kDa	3669	AA831661	Hs.744981
8.63e-05	0.000164	4.98	214660_at	ITGA1	integrin, alpha 1	3672	AL833564	Hs.371576
< 1e-07	< 1e-07	0.017	205786_s_at	ITGAM	integrin, alpha M (complement component 3 receptor 3 subunit)	3684	NM_002133	Hs.517581	IL-10 Anti-inflammatory Signaling Pathway, Oxidative Stress Induced Gene Expression Via Nrf2, Porphyrin and chlorophyll metabolism
< 1e-07	< 1e-07	0.12	210184_at	ITGAX	integrin, alpha X (complement component 3 receptor 4 subunit)	3687	BC028290	Hs.369819
< 1e-07	< 1e-07	0.037	202803_s_at	ITGB2	integrin, beta 2 (complement component 3 receptor 3 and 4 subunit)	3689	NM_004907	Hs.501629
1e-07	3.48e-07	0.041	1555349_a_at	ITGB2	integrin, beta 2 (complement component 3 receptor 3 and 4 subunit)	3689	BC006230	Hs.277035	Glycerolipid metabolism, Metabolic pathways
< 1e-07	< 1e-07	0.047	211339_s_at	ITK	IL2-inducible T-cell kinase	3702	NM_004938	Hs.380277	Bladder cancer, Pathways in cancer
< 1e-07	< 1e-07	0.25	225582_at	ITPRIP	inositol 1,4,5-trisphosphate receptor interacting protein	85450	AK022831	Hs.511265	Axon guidance
< 1e-07	< 1e-07	0.15	1552610_a_at	JAK1	Janus kinase 1	3716	U28964	Hs.492407	Cell cycle, Neurotrophin signaling pathway, Oocyte meiosis, Pathogenic Escherichia coli infection
< 1e-07	< 1e-07	0.12	227677_at	JAK3	Janus kinase 3	3718	AI652861	Hs.309288
7e-07	2.07e-06	0.24	213281_at	JUN	jun proto-oncogene	3725	AK023938	Hs.471779
< 1e-07	< 1e-07	0.053	201473_at	JUNB	jun B proto-oncogene	3726	NM_021647	Hs.593942
< 1e-07	< 1e-07	5.15	227713_at	KATNAL1	katanin p60 subunit A-like 1	84056	AW025023	Hs.234478	Long-term potentiation, MAPK signaling pathway, mTOR signaling pathway, Neurotrophin signaling pathway, Oocyte meiosis, Progesterone-mediated oocyte maturation
1.3e-06	3.6e-06	4.83	226479_at	KBTBD6	kelch repeat and BTB (POZ) domain containing 6	89890	W81119	Hs.435661	Metabolic pathways, Sphingolipid metabolism
< 1e-07	< 1e-07	0.2	203402_at	KCNAB2	potassium channel, voltage gated subfamily A regulatory beta subunit 2	8514	AW572906	Hs.120403
< 1e-07	< 1e-07	0.046	227647_at	KCNE3	potassium channel, voltage gated subfamily E regulatory beta subunit 3	10008	AF131831	Hs.508829
< 1e-07	< 1e-07	0.011	210119_at	KCNJ15	potassium channel, inwardly rectifying subfamily J, member 15	3772	AF060152	Hs.643357
< 1e-07	< 1e-07	0.11	211806_s_at	KCNJ15	potassium channel, inwardly rectifying subfamily J, member 15	3772	NM_004030	Hs.166120	The information-processing pathway at the IFN-beta enhancer, Cytosolic DNA-sensing pathway, Hepatitis C, RIG-I-like receptor signaling pathway, Toll-like receptor signaling pathway
3e-07	9.59e-07	0.13	230585_at	KCNJ15	potassium channel, inwardly rectifying subfamily J, member 15	3772	NM_002984	Hs.75703	Pertussis toxin-insensitive CCR5 Signaling in Macrophage, Selective expression of chemokine receptors during T-cell polarization, Chemokine signaling pathway, Cytokine-cytokine receptor interaction, Cytosolic DNA-sensing pathway, Toll-like receptor signaling pathway
< 1e-07	< 1e-07	0.049	206765_at	KCNJ2	potassium channel, inwardly rectifying subfamily J, member 2	3759	NM_014367	Hs.584881
2.3e-06	5.97e-06	5.81	228127_at	KCNK3	potassium channel, two pore domain subfamily K, member 3	3777	AA748418	Hs.33368
2.54e-05	5.26e-05	5.94	205952_at	KCNK3	potassium channel, two pore domain subfamily K, member 3	3777	BG542347	Hs.411299	Gastric acid secretion
< 1e-07	< 1e-07	17.22	235108_at	KCNK3	potassium channel, two pore domain subfamily K, member 3	3777	NM_001928	Hs.155597	Alternative Complement Pathway, Complement Pathway, Complement and coagulation cascades, Staphylococcus aureus infection
7e-07	2.07e-06	0.2	221584_s_at	KCNMA1	potassium channel, calcium activated large conductance subfamily M alpha, member 1	3778	U08839	Hs.466871	Complement and coagulation cascades
7.12e-05	0.000137	4.04	234103_at	KCNT2	potassium channel, sodium activated subfamily T, member 2	343450	BC005254	Hs.85201
< 1e-07	< 1e-07	4.23	219479_at	KDELC1	KDEL (Lys-Asp-Glu-Leu) containing 1	79070	AV722190	Hs.163893	Endocytotic role of NDK, Phosphins and Dynamin
5e-07	1.53e-06	6.37	204017_at	KDELR3	KDEL (Lys-Asp-Glu-Leu) endoplasmic reticulum protein retention receptor 3	11015	AI928407	Hs.518265
< 1e-07	< 1e-07	0.048	44790_s_at	KIAA0226L	KIAA0226-like	80183	NM_020651	Hs.7886
< 1e-07	< 1e-07	0.13	219471_at	KIAA0226L	KIAA0226-like	80183	NM_014314	Hs.190622	Cytosolic DNA-sensing pathway, Hepatitis C, RIG-I-like receptor signaling pathway
< 1e-07	< 1e-07	4.51	1554438_at	KIAA1217	KIAA1217	56243	BG403486	Hs.221497
< 1e-07	< 1e-07	14.36	231807_at	KIAA1217	KIAA1217	56243	AL583538	Hs.654826
< 1e-07	< 1e-07	8.11	226534_at	KITLG	KIT ligand	4254	BE674466	Hs.370287
< 1e-07	< 1e-07	0.065	219371_s_at	KLF2	Kruppel-like factor 2	10365	NM_000847	Hs.102484	Drug metabolism - cytochrome P450, Glutathione metabolism, Metabolism of xenobiotics by cytochrome P450
< 1e-07	< 1e-07	0.12	225140_at	KLF3	Kruppel-like factor 3 (basic)	51274	AI831932	Hs.744182
< 1e-07	< 1e-07	0.026	221841_s_at	KLF4	Kruppel-like factor 4 (gut)	9314	NM_000627	Hs.619315	TGF-beta signaling pathway
< 1e-07	< 1e-07	0.081	220266_s_at	KLF4	Kruppel-like factor 4 (gut)	9314	AA706658	Hs.591054	Apoptotic Signaling in Response to DNA Damage, HIV-I Nef: negative effector of Fas and TNF, Induction of apoptosis through DR3 and DR4/5 Death Receptors , Role of Mitochondria in Apoptotic Signaling, Alzheimer's disease, Amyotrophic lateral sclerosis (ALS), Apoptosis, Natural killer cell mediated cytotoxicity, p53 signaling pathway, Pathways in cancer, Viral myocarditis
< 1e-07	< 1e-07	0.057	208961_s_at	KLF6	Kruppel-like factor 6	1316	AF143684	Hs.123198
6e-07	1.81e-06	0.066	208960_s_at	KLF6	Kruppel-like factor 6	1316	NM_001548	Hs.20315	Hepatitis C
2e-07	6.63e-07	0.15	224606_at	KLF6	Kruppel-like factor 6	1316	AI452595	Hs.710275	Other types of O-glycan biosynthesis
1.27e-05	2.79e-05	0.2	1555832_s_at	KLF6	Kruppel-like factor 6	1316	AL575509	Hs.644231	Keratinocyte Differentiation, METS affect on Macrophage Differentiation, Dorso-ventral axis formation
6.31e-05	0.000122	0.21	203543_s_at	KLF9	Kruppel-like factor 9	687	M37780	Hs.376675	Adhesion and Diapedesis of Granulocytes, Adhesion and Diapedesis of Lymphocytes, Adhesion Molecules on Lymphocyte, Cell to Cell Adhesion Signaling, Monocyte and its Surface Molecules, Neutrophil and Its Surface Molecules, Cell adhesion molecules (CAMs), Leukocyte transendothelial migration, Malaria
< 1e-07	< 1e-07	8.01	227875_at	KLHL13	kelch-like family member 13	90293	NM_138957	Hs.431850	Agrin in Postsynaptic Differentiation, Angiotensin II mediated activation of JNK Pathway via Pyk2 dependent signaling, Aspirin Blocks Signaling Pathway Involved in Platelet Activation, Bioactive Peptide Induced Signaling Pathway, Cadmium induces DNA synthesis and proliferation in macrophages, CCR3 signaling in Eosinophils, Ceramide Signaling Pathway, CXCR4 Signaling Pathway, Erk and PI-3 Kinase A…
< 1e-07	< 1e-07	12.77	221221_s_at	KLHL3	kelch-like family member 3	26249	NM_016582	Hs.237856
8e-07	2.34e-06	4.97	225961_at	KLHL42	kelch-like family member 42	57542	NM_004418	Hs.1183	Regulation of MAP Kinase Pathways Through Dual Specificity Phosphatases, MAPK signaling pathway
< 1e-07	< 1e-07	0.13	220646_s_at	KLRF1	killer cell lectin-like receptor subfamily F, member 1	51348	M36532	Hs.155097	Bile secretion, Collecting duct acid secretion, Gastric acid secretion, Nitrogen metabolism, Pancreatic secretion, Proximal tubule bicarbonate reclamation
< 1e-07	< 1e-07	0.15	205306_x_at	KMO	kynurenine 3-monooxygenase (kynurenine 3-hydroxylase)	8564	NM_003916	Hs.121592	Lysosome
< 1e-07	< 1e-07	0.17	211138_s_at	KMO	kynurenine 3-monooxygenase (kynurenine 3-hydroxylase)	8564	AI761520	Hs.514063
1.75e-05	3.73e-05	0.21	34031_i_at	KRIT1	KRIT1, ankyrin repeat containing	889	NM_025151	Hs.191179	Endocytosis
< 1e-07	< 1e-07	0.068	218963_s_at	KRT23	keratin 23, type I	25984	L18865	Hs.551713
3.5e-06	8.72e-06	8.99	231849_at	KRT80	keratin 80, type II	144501	AL520102	Hs.440497
< 1e-07	< 1e-07	0.025	217388_s_at	KYNU	kynureninase	8942	AY028896	Hs.57973
9.3e-06	2.09e-05	0.23	210663_s_at	KYNU	kynureninase	8942	D50402	Hs.591607	Lysosome
< 1e-07	< 1e-07	0.082	210644_s_at	LAIR1	leukocyte-associated immunoglobulin-like receptor 1	3903	K01144	Hs.436568	Antigen Processing and Presentation, Antigen processing and presentation
1.7e-06	4.57e-06	0.16	201551_s_at	LAMP1	lysosomal-associated membrane protein 1	3916	NM_000275	Hs.654411
7.5e-06	1.72e-05	0.24	223009_at	LAMTOR1	late endosomal/lysosomal adaptor, MAPK and MTOR activator 1	55004	NM_002953	Hs.149957	Cell Cycle: G2/M Checkpoint, Erk1/Erk2 Mapk Signaling pathway, Growth Hormone Signaling Pathway, How Progesterone Initiates the Oocyte Maturation, MAPKinase Signaling Pathway, Melanocyte Development and Pigmentation Pathway, Multiple antiapoptotic pathways from IGF-1R signaling lead to BAD phosphorylation, Regulation of BAD phosphorylation, Role of Erk5 in Neuronal Survival, Transcription factor …
4.74e-05	9.4e-05	4.12	214039_s_at	LAPTM4B	lysosomal protein transmembrane 4 beta	55353	AF270513	Hs.532815
< 1e-07	< 1e-07	4.55	208029_s_at	LAPTM4B	lysosomal protein transmembrane 4 beta	55353	AA789296	Hs.460857	Ether lipid metabolism, Glycerophospholipid metabolism, Metabolic pathways
< 1e-07	< 1e-07	0.012	201721_s_at	LAPTM5	lysosomal protein transmembrane 5	7805	NM_003069	Hs.152292
< 1e-07	< 1e-07	0.029	201720_s_at	LAPTM5	lysosomal protein transmembrane 5	7805	NM_001186	Hs.154276
2e-06	5.25e-06	4.22	218651_s_at	LARP6	La ribonucleoprotein domain family, member 6	55323	AW150913	Hs.496666
4e-07	1.25e-06	4.27	236565_s_at	LARP6	La ribonucleoprotein domain family, member 6	55323	D84105	Hs.510402	Complement and coagulation cascades
< 1e-07	< 1e-07	4.37	228080_at	LAYN	layilin	143903	N62996	Hs.382874
< 1e-07	< 1e-07	0.057	204891_s_at	LCK	LCK proto-oncogene, Src family tyrosine kinase	3932	R44298	Hs.73739	Calcium signaling pathway, Neuroactive ligand-receptor interaction
< 1e-07	< 1e-07	0.039	208885_at	LCP1	lymphocyte cytosolic protein 1 (L-plastin)	3936	NM_002339	Hs.56729
< 1e-07	< 1e-07	0.0073	205269_at	LCP2	lymphocyte cytosolic protein 2 (SH2 domain containing leukocyte protein of 76kDa)	3937	NM_006060	Hs.435949
< 1e-07	< 1e-07	0.021	205270_s_at	LCP2	lymphocyte cytosolic protein 2 (SH2 domain containing leukocyte protein of 76kDa)	3937	NM_018192	Hs.374191
7e-07	2.07e-06	0.13	244598_at	LCP2	lymphocyte cytosolic protein 2 (SH2 domain containing leukocyte protein of 76kDa)	3937	AI051769	Hs.263671	Regulation of actin cytoskeleton
< 1e-07	< 1e-07	0.16	244251_at	LCP2	lymphocyte cytosolic protein 2 (SH2 domain containing leukocyte protein of 76kDa)	3937	AI242749	Hs.647389
0.000992	0.00156	0.24	206945_at	LCT	lactase	3938	BF033855	Hs.420229
< 1e-07	< 1e-07	0.071	221558_s_at	LEF1	lymphoid enhancer-binding factor 1	51176	AW135306	Hs.444277
3e-06	7.61e-06	9.14	1561281_a_at	LEMD1-AS1	LEMD1 antisense RNA 1	284576	AK093081	Hs.491861
< 1e-07	< 1e-07	0.21	208450_at	LGALS2	lectin, galactoside-binding, soluble, 2	3957	NM_018407	Hs.492314	Lysosome
< 1e-07	< 1e-07	0.18	208949_s_at	LGALS3	lectin, galactoside-binding, soluble, 3	3958	AI076186	Hs.518530	Agrin in Postsynaptic Differentiation, FAS signaling pathway ( CD95 ), Fc Epsilon Receptor I Signaling in Mast Cells, HIV-I Nef: negative effector of Fas and TNF, MAPKinase Signaling Pathway, TNFR1 Signaling Pathway, Axon guidance, ErbB signaling pathway, Focal adhesion, MAPK signaling pathway, Regulation of actin cytoskeleton, Renal cell carcinoma, T cell receptor signaling pathway
1.34e-05	2.92e-05	0.19	203236_s_at	LGALS9	lectin, galactoside-binding, soluble, 9	3965	BE856341	Hs.503831
0.0007743	0.00124	0.21	201212_at	LGMN	legumain	5641	NM_014800	Hs.434989	Bacterial invasion of epithelial cells, Chemokine signaling pathway, Shigellosis
0.0001788	0.00032	4.77	218326_s_at	LGR4	leucine-rich repeat containing G protein-coupled receptor 4	55366	M63310	Hs.480042
2e-07	6.63e-07	7.32	207240_s_at	LHCGR	luteinizing hormone/choriogonadotropin receptor	3973	AL533234	Hs.371609	p53 signaling pathway
< 1e-07	< 1e-07	0.1	210660_at	LILRA1	leukocyte immunoglobulin-like receptor, subfamily A (with TM domain), member 1	11024	AF029346	Hs.481186
< 1e-07	< 1e-07	0.018	207857_at	LILRA2	leukocyte immunoglobulin-like receptor, subfamily A (with TM domain), member 2	11027	AB046848	Hs.458607
< 1e-07	< 1e-07	0.085	211100_x_at	LILRA2	leukocyte immunoglobulin-like receptor, subfamily A (with TM domain), member 2	11027	BE971383	Hs.28491	Arginine and proline metabolism, Metabolic pathways
3e-07	9.59e-07	0.1	211101_x_at	LILRA2	leukocyte immunoglobulin-like receptor, subfamily A (with TM domain), member 2	11027	AA425726	Hs.523252
< 1e-07	< 1e-07	0.17	208594_x_at	LILRA6	leukocyte immunoglobulin-like receptor, subfamily A (with TM domain), member 6	79168	BC001604	Hs.182014	Regulation of actin cytoskeleton
< 1e-07	3.48e-07	0.13	211336_x_at	LILRB1	leukocyte immunoglobulin-like receptor, subfamily B (with TM and ITIM domains), member 1	10859	AV686235	Hs.89983	Complement Pathway, Lectin Induced Complement Pathway, Complement and coagulation cascades, Staphylococcus aureus infection
5e-07	1.53e-06	0.15	207104_x_at	LILRB1	leukocyte immunoglobulin-like receptor, subfamily B (with TM and ITIM domains), member 1	10859	AF198052	Hs.370503
< 1e-07	< 1e-07	0.01	210146_x_at	LILRB2	leukocyte immunoglobulin-like receptor, subfamily B (with TM and ITIM domains), member 2	10288	M13436	Hs.583348	Cytokine-cytokine receptor interaction, TGF-beta signaling pathway
< 1e-07	< 1e-07	0.033	207697_x_at	LILRB2	leukocyte immunoglobulin-like receptor, subfamily B (with TM and ITIM domains), member 2	10288	N69091	Hs.106511
< 1e-07	< 1e-07	0.15	211135_x_at	LILRB3	leukocyte immunoglobulin-like receptor, subfamily B (with TM and ITIM domains), member 3	11025	AF237772	Hs.658995	Focal adhesion
< 1e-07	< 1e-07	0.16	210784_x_at	LILRB3	leukocyte immunoglobulin-like receptor, subfamily B (with TM and ITIM domains), member 3	11025	BF968097	Hs.40758
< 1e-07	< 1e-07	0.2	210225_x_at	LILRB3	leukocyte immunoglobulin-like receptor, subfamily B (with TM and ITIM domains), member 3	11025	AW294986	Hs.578544
5.89e-05	0.000115	5.21	222457_s_at	LIMA1	LIM domain and actin binding 1	51474	J05021	Hs.487027	Cystic fibrosis transmembrane conductance regulator (CFTR) and beta 2 adrenergic receptor (b2AR) pathway, mCalpain and friends in Cell motility, uCalpain and friends in Cell spread, Gastric acid secretion, Leukocyte transendothelial migration, Pathogenic Escherichia coli infection, Regulation of actin cytoskeleton
< 1e-07	< 1e-07	5.15	222762_x_at	LIMD1	LIM domains containing 1	8994	AU143855	Hs.413801	Proteasome
4e-07	1.25e-06	0.24	227929_at	LIN7A	lin-7 homolog A (C. elegans)	8825	NM_015271	Hs.435711
< 1e-07	< 1e-07	30.59	1558404_at	LINC00622	long intergenic non-protein coding RNA 622	644242	AA173223	Hs.289044
3e-07	9.59e-07	6.08	236798_at	LINC00888	long intergenic non-protein coding RNA 888	100505687	AI832074	Hs.743313
< 1e-07	< 1e-07	0.11	238893_at	LINC00936	long intergenic non-protein coding RNA 936	338758	BF059159	Hs.744218	Axon guidance
< 1e-07	< 1e-07	0.15	227129_x_at	LINC01000	long intergenic non-protein coding RNA 1000	402483	NM_005877	Hs.406277	Spliceosome
0.0001127	0.000209	5.38	237460_x_at	LINC01588	long intergenic non-protein coding RNA 1588	283551	AB032977	Hs.585374
2e-07	6.63e-07	7.5	219181_at	LIPG	lipase, endothelial	9388	AW452588	Hs.654652
< 1e-07	< 1e-07	0.013	200706_s_at	LITAF	lipopolysaccharide-induced TNF factor	9516	NM_016081	Hs.151220
< 1e-07	< 1e-07	0.02	200704_at	LITAF	lipopolysaccharide-induced TNF factor	9516	AF051782	Hs.529451	Erk and PI-3 Kinase Are Necessary for Collagen Binding in Corneal Epithelia, Rho cell motility signaling pathway, Role of MAL in Rho-Mediated Activation of SRF, Focal adhesion, Regulation of actin cytoskeleton, Shigellosis
< 1e-07	< 1e-07	0.02	204249_s_at	LMO2	LIM domain only 2 (rhombotin-like 1)	4005	AI742057	Hs.7155	Metabolic pathways, Pyrimidine metabolism
0.0001843	0.000329	4.89	242722_at	LMO7	LIM domain 7	4008	AW450363	Hs.111554
4e-07	1.25e-06	0.23	231886_at	LOC100134822	uncharacterized LOC100134822	100134822	AL136861	Hs.513779
< 1e-07	< 1e-07	60.13	232397_at	LOC101927482	uncharacterized LOC101927482	101927482	AA858297	Hs.647074
1.8e-06	4.8e-06	9.04	242873_at	LOC101928100	uncharacterized LOC101928100	101928100	NM_003043	Hs.529488
0.0003938	0.00066	0.21	242714_at	LOC101928429	uncharacterized LOC101928429	101928429	N63920	Hs.596025
0.0002012	0.000356	0.23	236079_at	LOC202025	uncharacterized LOC202025	202025	W74640	Hs.369819
< 1e-07	< 1e-07	0.19	240572_s_at	LOC374443	C-type lectin domain family 2, member D pseudogene	374443	L08961	Hs.306178
6e-07	1.81e-06	0.17	1559964_at	LOC401261	zinc finger protein ZIC 5	401261	NM_000211	Hs.375957	Adhesion and Diapedesis of Granulocytes, Adhesion and Diapedesis of Lymphocytes, Adhesion Molecules on Lymphocyte, B Lymphocyte Cell Surface Molecules, Cells and Molecules involved in local acute inflammatory response, CTL mediated immune response against target cells , Monocyte and its Surface Molecules, Neutrophil and Its Surface Molecules, T Cytotoxic Cell Surface Molecules, T Helper Cell Surf…
< 1e-07	< 1e-07	0.21	1558011_at	LOC441081	POM121 membrane glycoprotein (rat) pseudogene	441081	NM_018004	Hs.658956
< 1e-07	3.48e-07	17.76	215446_s_at	LOX	lysyl oxidase	4015	D42043	Hs.98910
9e-07	2.6e-06	8.45	202998_s_at	LOXL2	lysyl oxidase-like 2	4017	AI689210	Hs.437075	Huntington's disease, Prostate cancer, Vasopressin-regulated water reabsorption
< 1e-07	< 1e-07	0.16	218589_at	LPAR6	lysophosphatidic acid receptor 6	10161	AU144792	Hs.198072	Purine metabolism
< 1e-07	< 1e-07	0.054	227889_at	LPCAT2	lysophosphatidylcholine acyltransferase 2	54947	D31815	Hs.77854
< 1e-07	< 1e-07	0.22	239598_s_at	LPCAT2	lysophosphatidylcholine acyltransferase 2	54947	BF593636	Hs.445239
7e-07	2.07e-06	0.25	222833_at	LPCAT2	lysophosphatidylcholine acyltransferase 2	54947	NM_001772	Hs.83731	Dendritic cells in regulating TH1 and TH2 Development, Hematopoietic cell lineage
1.71e-05	3.65e-05	0.12	241879_at	LPP	LIM domain containing preferred translocation partner in lipoma	4026	N30339	Hs.210283	Amoebiasis, ECM-receptor interaction, Focal adhesion, Protein digestion and absorption
< 1e-07	< 1e-07	0.21	216250_s_at	LPXN	leupaxin	9404	AW444761	Hs.72901	Cell Cycle: G1/S Check Point , Cyclins and Cell Cycle Regulation, Cell cycle, Pathways in cancer, Small cell lung cancer, TGF-beta signaling pathway
< 1e-07	< 1e-07	4.57	214109_at	LRBA	LPS-responsive vesicle trafficking, beach and anchor containing	987	BF434846	Hs.143250	ECM-receptor interaction, Focal adhesion
< 1e-07	< 1e-07	7.67	227688_at	LRCH2	leucine-rich repeats and calponin homology (CH) domain containing 2	57631	BI825302	Hs.26216
< 1e-07	< 1e-07	0.15	228648_at	LRG1	leucine-rich alpha-2-glycoprotein 1	116844	AU144114	Hs.2799
3.44e-05	6.98e-05	4.75	238653_at	LRIG2	leucine-rich repeats and immunoglobulin-like domains 2	9860	BC013385	Hs.143929	Phagosome
< 1e-07	< 1e-07	0.032	35974_at	LRMP	lymphoid-restricted membrane protein	4033	NM_000050	Hs.160786	Alanine, aspartate and glutamate metabolism, Arginine and proline metabolism, Metabolic pathways
< 1e-07	< 1e-07	0.064	204674_at	LRMP	lymphoid-restricted membrane protein	4033	AW173076	Hs.584842
< 1e-07	< 1e-07	10.03	225060_at	LRP11	low density lipoprotein receptor-related protein 11	84918	NM_004235	Hs.376206
4.67e-05	9.27e-05	4.19	220253_s_at	LRP12	low density lipoprotein receptor-related protein 12	29967	BC005016	Hs.435711
2.24e-05	4.68e-05	4.67	225745_at	LRP6	low density lipoprotein receptor-related protein 6	4040	S36219	Hs.201978	Aspirin Blocks Signaling Pathway Involved in Platelet Activation, Eicosanoid Metabolism, Mechanism of Acetaminophen Activity and Toxicity, Arachidonic acid metabolism, Metabolic pathways
1.5e-06	4.09e-06	4.02	218816_at	LRRC1	leucine rich repeat containing 1	55227	BC013009	Hs.522684
3.1e-06	7.84e-06	4.79	212976_at	LRRC8B	leucine rich repeat containing 8 family, member B	23507	BG112263	Hs.591949
< 1e-07	< 1e-07	0.1	215375_x_at	LRRFIP1	leucine rich repeat (in FLII) interacting protein 1	9208	AU144259	Hs.193370
< 1e-07	< 1e-07	0.14	203523_at	LSP1	lymphocyte-specific protein 1	4046	AB013104	Hs.523702
< 1e-07	< 1e-07	0.027	214181_x_at	LST1	leukocyte specific transcript 1	7940	AI760464	Hs.339453
< 1e-07	< 1e-07	0.044	211582_x_at	LST1	leukocyte specific transcript 1	7940	AJ278890	Hs.368315
< 1e-07	< 1e-07	0.049	210629_x_at	LST1	leukocyte specific transcript 1	7940	BC000892	Hs.532835
< 1e-07	< 1e-07	0.052	214574_x_at	LST1	leukocyte specific transcript 1	7940	AI768628	Hs.655445
< 1e-07	< 1e-07	0.071	215633_x_at	LST1	leukocyte specific transcript 1	7940	NM_006825	Hs.74368	Protein processing in endoplasmic reticulum
4e-07	1.25e-06	0.088	211581_x_at	LST1	leukocyte specific transcript 1	7940	S67779	Hs.478588
< 1e-07	< 1e-07	0.089	207339_s_at	LTB	lymphotoxin beta (TNF superfamily, member 3)	4050	W72082	Hs.97199
< 1e-07	< 1e-07	0.13	236172_at	LTB4R	leukotriene B4 receptor	1241	NM_000573	Hs.334019	B Lymphocyte Cell Surface Molecules, Complement and coagulation cascades, Hematopoietic cell lineage, Leishmaniasis, Malaria
4.9e-06	1.18e-05	4.3	202728_s_at	LTBP1	latent transforming growth factor beta binding protein 1	4052	AI692180	Hs.655714
< 1e-07	< 1e-07	7.47	202729_s_at	LTBP1	latent transforming growth factor beta binding protein 1	4052	BC002642	Hs.181301	Antigen processing and presentation, Lysosome, Phagosome
2e-06	5.25e-06	6.25	1558173_a_at	LUZP1	leucine zipper protein 1	7798	AI675780	Hs.446354
< 1e-07	< 1e-07	4.75	218729_at	LXN	latexin	56925	AI991160	Hs.720076
< 1e-07	< 1e-07	0.11	205859_at	LY86	lymphocyte antigen 86	9450	U88964	Hs.459265
< 1e-07	< 1e-07	0.013	206584_at	LY96	lymphocyte antigen 96	23643	NM_014863	Hs.287537	Glycosaminoglycan biosynthesis - chondroitin sulfate
< 1e-07	< 1e-07	0.099	210044_s_at	LYL1	lymphoblastic leukemia associated hematopoiesis regulator 1	4066	AI862694	Hs.288809
< 1e-07	< 1e-07	0.012	202626_s_at	LYN	LYN proto-oncogene, Src family tyrosine kinase	4067	AK027054	Hs.310429
< 1e-07	< 1e-07	0.013	202625_at	LYN	LYN proto-oncogene, Src family tyrosine kinase	4067	NM_016234	Hs.11638	Adipocytokine signaling pathway, Fatty acid metabolism, Metabolic pathways, Peroxisome, PPAR signaling pathway
< 1e-07	< 1e-07	0.033	210754_s_at	LYN	LYN proto-oncogene, Src family tyrosine kinase	4067	NM_005825	Hs.99491	Chemokine signaling pathway, MAPK signaling pathway
1.4e-06	3.86e-06	0.2	226748_at	LYSMD2	LysM, putative peptidoglycan-binding, domain containing 2	256586	AI653107	Hs.209527
< 1e-07	3.48e-07	0.19	203518_at	LYST	lysosomal trafficking regulator	1130	AU157017	Hs.326801
< 1e-07	< 1e-07	0.029	219059_s_at	LYVE1	lymphatic vessel endothelial hyaluronan receptor 1	10894	NM_001114	Hs.513578	Bile secretion, Calcium signaling pathway, Chemokine signaling pathway, Dilated cardiomyopathy, Gap junction, Gastric acid secretion, GnRH signaling pathway, Melanogenesis, Oocyte meiosis, Pancreatic secretion, Progesterone-mediated oocyte maturation, Purine metabolism, Salivary secretion, Vascular smooth muscle contraction
< 1e-07	3.48e-07	0.052	220037_s_at	LYVE1	lymphatic vessel endothelial hyaluronan receptor 1	10894	AF229163	Hs.591607	Lysosome
< 1e-07	< 1e-07	0.0092	213975_s_at	LYZ	lysozyme	4069	AB011133	Hs.466184
< 1e-07	3.48e-07	0.053	1555745_a_at	LYZ	lysozyme	4069	NM_022731	Hs.213061
< 1e-07	< 1e-07	0.011	218559_s_at	MAFB	v-maf avian musculoaponeurotic fibrosarcoma oncogene homolog B	9935	N90755	Hs.132902
< 1e-07	< 1e-07	0.022	222670_s_at	MAFB	v-maf avian musculoaponeurotic fibrosarcoma oncogene homolog B	9935	AI291720	Hs.440776
7.49e-05	0.000144	0.25	1566539_at	MAGI1	membrane associated guanylate kinase, WW and PDZ domain containing 1	9223	NM_030804	Hs.17631	Basal cell carcinoma, Melanogenesis, Pathways in cancer, Wnt signaling pathway
1.5e-06	4.09e-06	0.23	220302_at	MAK	male germ cell-associated kinase	4117	NM_007063	Hs.442657
< 1e-07	< 1e-07	0.18	204777_s_at	MAL	mal, T-cell differentiation protein	4118	M27487	Hs.347270	Allograft rejection, Antigen processing and presentation, Asthma, Autoimmune thyroid disease, Cell adhesion molecules (CAMs), Graft-versus-host disease, Intestinal immune network for IgA production, Leishmaniasis, Phagosome, Rheumatoid arthritis, Staphylococcus aureus infection, Systemic lupus erythematosus, Toxoplasmosis, Type I diabetes mellitus, Viral myocarditis
0.0004214	0.000703	5.57	224567_x_at	MALAT1	metastasis associated lung adenocarcinoma transcript 1 (non-protein coding)	378938	U90940	Hs.656750	Fc gamma R-mediated phagocytosis, Leishmaniasis, Osteoclast differentiation, Phagosome, Staphylococcus aureus infection, Systemic lupus erythematosus
4.4e-06	1.07e-05	0.19	208116_s_at	MAN1A1	mannosidase, alpha, class 1A, member 1	4121	AU119437	Hs.106511
0.0006172	0.001	0.23	220945_x_at	MANSC1	MANSC domain containing 1	54682	AF231056	Hs.468972	Chromatin Remodeling by hSWI/SNF ATP-dependent Complexes, Control of Gene Expression by Vitamin D Receptor
< 1e-07	< 1e-07	0.21	225927_at	MAP3K1	mitogen-activated protein kinase kinase kinase 1, E3 ubiquitin protein ligase	4214	BC005934	Hs.709277	RIG-I-like receptor signaling pathway
< 1e-07	< 1e-07	0.09	205027_s_at	MAP3K8	mitogen-activated protein kinase kinase kinase 8	1326	NM_015675	Hs.110571	Cell cycle, MAPK signaling pathway, p53 signaling pathway
5e-07	1.53e-06	0.12	235421_at	MAP3K8	mitogen-activated protein kinase kinase kinase 8	1326	NM_000576	Hs.126256	IL 5 Signaling Pathway, Msp/Ron Receptor Signaling Pathway, NFkB activation by Nontypeable Hemophilus influenzae, Signal transduction through IL1R, African trypanosomiasis, Alzheimer's disease, Amoebiasis, Apoptosis, Chagas disease (American trypanosomiasis), Cytokine-cytokine receptor interaction, Cytosolic DNA-sensing pathway, Graft-versus-host disease, Hematopoietic cell lineage, Leishmaniasis…
3.5e-06	8.72e-06	5.72	218311_at	MAP4K3	mitogen-activated protein kinase kinase kinase kinase 3	8491	BF057821	Hs.744153
8e-07	2.34e-06	4.44	228262_at	MAP7D2	MAP7 domain containing 2	256714	NM_030802	Hs.514308
< 1e-07	< 1e-07	0.16	1552264_a_at	MAPK1	mitogen-activated protein kinase 1	5594	NM_016594	Hs.655103
< 1e-07	< 1e-07	0.24	1552263_at	MAPK1	mitogen-activated protein kinase 1	5594	AW157548	Hs.607212	Ghrelin: Regulation of Food Intake and Energy Homeostasis
< 1e-07	< 1e-07	0.19	210449_x_at	MAPK14	mitogen-activated protein kinase 14	1432	AI337069	Hs.17518
< 1e-07	< 1e-07	0.2	211561_x_at	MAPK14	mitogen-activated protein kinase 14	1432	AF519621	Hs.473341
< 1e-07	< 1e-07	6.6	226046_at	MAPK8	mitogen-activated protein kinase 8	5599	AF223938	Hs.310429
< 1e-07	< 1e-07	0.058	219574_at	MARCH1	membrane-associated ring finger (C3HC4) 1, E3 ubiquitin protein ligase	55016	NM_003461	Hs.490415	Integrin Signaling Pathway, Focal adhesion
< 1e-07	< 1e-07	0.098	229383_at	MARCH1	membrane-associated ring finger (C3HC4) 1, E3 ubiquitin protein ligase	55016	NM_017709	Hs.356216
< 1e-07	< 1e-07	0.13	235385_at	MARCH1	membrane-associated ring finger (C3HC4) 1, E3 ubiquitin protein ligase	55016	NM_024539	Hs.496542
< 1e-07	< 1e-07	14.84	213256_at	MARCH3	membrane-associated ring finger (C3HC4) 3, E3 ubiquitin protein ligase	115123	AJ224869	Hs.593413	CXCR4 Signaling Pathway, HIV-1 defeats host-mediated resistance by CEM15, Pertussis toxin-insensitive CCR5 Signaling in Macrophage, Selective expression of chemokine receptors during T-cell polarization, Axon guidance, Chemokine signaling pathway, Cytokine-cytokine receptor interaction, Endocytosis, Intestinal immune network for IgA production, Leukocyte transendothelial migration
< 1e-07	< 1e-07	0.058	205819_at	MARCO	macrophage receptor with collagenous structure	8685	N21202	Hs.696631	Endocytosis
< 1e-07	< 1e-07	9.81	232224_at	MASP1	mannan-binding lectin serine peptidase 1 (C4/C2 activating component of Ra-reactive factor)	5648	AW406569	Hs.211511
< 1e-07	3.48e-07	0.22	213045_at	MAST3	microtubule associated serine/threonine kinase 3	23031	NM_000081	Hs.532411
1.8e-06	4.8e-06	4.54	225613_at	MAST4	microtubule associated serine/threonine kinase family member 4	375449	NM_002534	Hs.524760	Hepatitis C
0.0002494	0.000436	4.8	204179_at	MB	myoglobin	4151	AA130998	Hs.520898	Antigen processing and presentation, Lysosome
7.2e-06	1.67e-05	4.25	230298_at	MBLAC2	metallo-beta-lactamase domain containing 2	153364	AW515443	Hs.213061
< 1e-07	< 1e-07	0.058	1558111_at	MBNL1	muscleblind-like splicing regulator 1	4154	AI275690	Hs.632486
1.6e-06	4.33e-06	0.1	201151_s_at	MBNL1	muscleblind-like splicing regulator 1	4154	AF223939	Hs.310429
< 1e-07	< 1e-07	0.22	201152_s_at	MBNL1	muscleblind-like splicing regulator 1	4154	AA382004	Hs.596025
5e-07	1.53e-06	0.12	219814_at	MBNL3	muscleblind-like splicing regulator 3	55796	AL036088	Hs.511265	Axon guidance
6.3e-06	1.47e-05	0.19	229498_at	MBNL3	muscleblind-like splicing regulator 3	55796	AI879064	Hs.370287
< 1e-07	< 1e-07	0.018	210136_at	MBP	myelin basic protein	4155	NM_000043	Hs.244139	Antigen Dependent B Cell Activation, Bystander B Cell Activation, CTL mediated immune response against target cells , FAS signaling pathway ( CD95 ), HIV Induced T Cell Apoptosis, HIV-I Nef: negative effector of Fas and TNF, IL-2 Receptor Beta Chain in T cell Activation, Keratinocyte Differentiation, Regulation of transcriptional activity by PML, Stress Induction of HSP Regulation, African trypan…
< 1e-07	< 1e-07	0.037	225407_at	MBP	myelin basic protein	4155	AW173691	Hs.11638	Adipocytokine signaling pathway, Fatty acid metabolism, Metabolic pathways, Peroxisome, PPAR signaling pathway
< 1e-07	< 1e-07	0.1	1554544_a_at	MBP	myelin basic protein	4155	NM_172313	Hs.524517	Cytokine-cytokine receptor interaction, Hematopoietic cell lineage, Jak-STAT signaling pathway, Pathways in cancer
< 1e-07	< 1e-07	25.07	209087_x_at	MCAM	melanoma cell adhesion molecule	4162	NM_001908	Hs.520898	Antigen processing and presentation, Lysosome
< 1e-07	< 1e-07	0.14	235568_at	MCEMP1	mast cell-expressed membrane protein 1	199675	U62858	Hs.496646	Cytokine-cytokine receptor interaction, Jak-STAT signaling pathway
< 1e-07	< 1e-07	0.053	200798_x_at	MCL1	myeloid cell leukemia 1	4170	NM_014056	Hs.593134
< 1e-07	< 1e-07	0.11	214056_at	MCL1	myeloid cell leukemia 1	4170	AF009007	Hs.667388	Osteoclast differentiation
0.000884	0.0014	0.17	200796_s_at	MCL1	myeloid cell leukemia 1	4170	M60626	Hs.753	fMLP induced chemokine gene expression in HMC-1 cells, Neuroactive ligand-receptor interaction, Staphylococcus aureus infection
< 1e-07	< 1e-07	0.081	220122_at	MCTP1	multiple C2 domains, transmembrane 1	79772	NM_018349	Hs.33368
< 1e-07	< 1e-07	0.11	235740_at	MCTP1	multiple C2 domains, transmembrane 1	79772	AW298375	Hs.24321	Ion Channels and Their Functional Role in Vascular Endothelium, Gap junction, Long-term depression, Purine metabolism, Salivary secretion, Vascular smooth muscle contraction
< 1e-07	< 1e-07	0.08	243109_at	MCTP2	multiple C2 domains, transmembrane 2	55784	AL136550	Hs.8769
< 1e-07	3.48e-07	0.16	220603_s_at	MCTP2	multiple C2 domains, transmembrane 2	55784	NM_006452	Hs.518774	Metabolic pathways, Purine metabolism
0.0002103	0.000371	5.28	204058_at	ME1	malic enzyme 1, NADP(+)-dependent, cytosolic	4199	L16895	Hs.102267
7.4e-06	1.7e-05	0.18	210154_at	ME2	malic enzyme 2, NAD(+)-dependent, mitochondrial	4200	NM_001908	Hs.520898	Antigen processing and presentation, Lysosome
2.08e-05	4.37e-05	0.21	216109_at	MED13L	mediator complex subunit 13-like	23389	NM_016164	Hs.655332
1e-07	3.48e-07	0.21	227787_s_at	MED30	mediator complex subunit 30	90390	AI692878	Hs.369022
< 1e-07	< 1e-07	15.29	232523_at	MEGF10	multiple EGF-like-domains 10	84466	NM_004664	Hs.144333	Chaperones modulate interferon Signaling Pathway
3.6e-06	8.94e-06	5.74	204825_at	MELK	maternal embryonic leucine zipper kinase	9833	AA017536	Hs.562154	Riboflavin metabolism
< 1e-07	< 1e-07	0.11	206028_s_at	MERTK	MER proto-oncogene, tyrosine kinase	10461	NM_007115	Hs.437322
< 1e-07	< 1e-07	0.25	211913_s_at	MERTK	MER proto-oncogene, tyrosine kinase	10461	U25677	Hs.524579	Salivary secretion
1e-07	3.48e-07	5.57	227993_at	METAP2	methionyl aminopeptidase 2	10988	NM_005980	Hs.2962
1.58e-05	3.4e-05	0.2	225955_at	METRNL	meteorin, glial cell differentiation regulator-like	284207	NM_152787	Hs.188256	NOD-like receptor signaling pathway
< 1e-07	< 1e-07	9.92	205442_at	MFAP3L	microfibrillar-associated protein 3-like	9848	BQ025347	Hs.529862	NFAT and Hypertrophy of the heart (Transcription in the broken heart), Hedgehog signaling pathway, Wnt signaling pathway
1.53e-05	3.31e-05	5.07	235911_at	MFI2	antigen p97 (melanoma associated) identified by monoclonal antibodies 133.2 and 96.5	4241	D21254	Hs.116471
4e-07	1.25e-06	0.16	204153_s_at	MFNG	MFNG O-fucosylpeptide 3-beta-N-acetylglucosaminyltransferase	4242	BC001051	Hs.111554
< 1e-07	< 1e-07	0.15	211026_s_at	MGLL	monoglyceride lipase	11343	BC002323	Hs.490415	Integrin Signaling Pathway, Focal adhesion
< 1e-07	< 1e-07	0.24	225102_at	MGLL	monoglyceride lipase	11343	BE903880	Hs.502328	Adhesion Molecules on Lymphocyte, Monocyte and its Surface Molecules, Neutrophil and Its Surface Molecules, ECM-receptor interaction, Hematopoietic cell lineage, Shigellosis
0.000773	0.00124	0.25	206247_at	MICB	MHC class I polypeptide-related sequence B	4277	AI308863	Hs.292356	Leukocyte transendothelial migration, Osteoclast differentiation, Phagosome
< 1e-07	< 1e-07	0.18	218251_at	MID1IP1	MID1 interacting protein 1	58526	BE897147	Hs.557850
7e-07	2.07e-06	5.28	229926_at	MIR3682	microRNA 3682	100500850	L20966	Hs.198072	Purine metabolism
1.3e-06	3.6e-06	0.2	235067_at	MKLN1	muskelin 1, intracellular mediator containing kelch motifs	4289	AA100891	Hs.379754	Cytosolic DNA-sensing pathway, RIG-I-like receptor signaling pathway
1.6e-06	4.33e-06	0.22	223199_at	MKNK2	MAP kinase interacting serine/threonine kinase 2	2872	BE856807	Hs.439145
2.1e-06	5.49e-06	5.09	200616_s_at	MLEC	malectin	9761	AI632692	Hs.411299	Gastric acid secretion
< 1e-07	< 1e-07	0.047	238025_at	MLKL	mixed lineage kinase domain-like	197259	AW268719	Hs.551751
< 1e-07	< 1e-07	13.23	211071_s_at	MLLT11	myeloid/lymphoid or mixed-lineage leukemia (trithorax homolog, Drosophila); translocated to, 11	10962	AF053641	Hs.90073
< 1e-07	< 1e-07	0.11	203435_s_at	MME	membrane metallo-endopeptidase	4311	AF483549	Hs.584940
2e-07	6.63e-07	0.16	203434_s_at	MME	membrane metallo-endopeptidase	4311	NM_003498	Hs.618526
0.0004813	0.000792	0.24	205680_at	MMP10	matrix metallopeptidase 10	4319	AY029180	Hs.466871	Complement and coagulation cascades
< 1e-07	< 1e-07	0.089	207890_s_at	MMP25	matrix metallopeptidase 25	64386	AK026461	Hs.178098	Angiotensin-converting enzyme 2 regulates heart function, Protein digestion and absorption, Renin-angiotensin system
< 1e-07	< 1e-07	0.093	203936_s_at	MMP9	matrix metallopeptidase 9	4318	AL355092	Hs.658995	Focal adhesion
1.42e-05	3.09e-05	5.06	223700_at	MND1	meiotic nuclear divisions 1 homolog (S. cerevisiae)	84057	AL138043	Hs.373801
< 1e-07	< 1e-07	0.077	225530_at	MOB3A	MOB kinase activator 3A	126308	AW089574	Hs.374477
< 1e-07	< 1e-07	0.2	226844_at	MOB3B	MOB kinase activator 3B	79817	U82276	Hs.655593	Osteoclast differentiation
< 1e-07	3.48e-07	0.24	229568_at	MOB3B	MOB kinase activator 3B	79817	BF792126	Hs.416755
< 1e-07	< 1e-07	0.01	226818_at	MPEG1	macrophage expressed 1	219972	NM_002405	Hs.517603	Notch signaling pathway, Other types of O-glycan biosynthesis
< 1e-07	< 1e-07	0.012	226841_at	MPEG1	macrophage expressed 1	219972	AI279062	Hs.125482
< 1e-07	< 1e-07	0.1	202974_at	MPP1	membrane protein, palmitoylated 1, 55kDa	4354	AW338933	Hs.644633	Inhibition of Matrix Metalloproteinases, p53 Signaling Pathway
< 1e-07	< 1e-07	9.72	205413_at	MPPED2	metallophosphoesterase domain containing 2	744	NM_016623	Hs.126941
< 1e-07	< 1e-07	0.12	227747_at	MPZL3	myelin protein zero-like 3	196264	NM_001776	Hs.576612	Purine metabolism, Pyrimidine metabolism
3e-07	9.59e-07	5.26	1555741_at	MRAP	melanocortin 2 receptor accessory protein	56246	AA521262	Hs.368434
< 1e-07	< 1e-07	0.029	204438_at	MRC1	mannose receptor, C type 1	4360	AF000426	Hs.436066
< 1e-07	< 1e-07	0.13	226047_at	MRVI1	murine retrovirus integration site 1 homolog	10335	NM_001829	Hs.481186
5e-06	1.2e-05	0.19	230214_at	MRVI1	murine retrovirus integration site 1 homolog	10335	AA845825	Hs.126941
< 1e-07	< 1e-07	0.0084	219607_s_at	MS4A4A	membrane-spanning 4-domains, subfamily A, member 4A	51338	AL080184	Hs.7089
< 1e-07	< 1e-07	0.086	1555728_a_at	MS4A4A	membrane-spanning 4-domains, subfamily A, member 4A	51338	N50119	Hs.592313	D4-GDI Signaling Pathway, Erk and PI-3 Kinase Are Necessary for Collagen Binding in Corneal Epithelia, PKC-catalyzed phosphorylation of inhibitory phosphoprotein of myosin phosphatase, Rho cell motility signaling pathway, Focal adhesion, Leukocyte transendothelial migration
< 1e-07	< 1e-07	0.021	224356_x_at	MS4A6A	membrane-spanning 4-domains, subfamily A, member 6A	64231	H71805	Hs.632486
< 1e-07	< 1e-07	0.023	230550_at	MS4A6A	membrane-spanning 4-domains, subfamily A, member 6A	64231	BC017978	Hs.351798
< 1e-07	< 1e-07	0.026	223280_x_at	MS4A6A	membrane-spanning 4-domains, subfamily A, member 6A	64231	AV700007	Hs.481181
< 1e-07	< 1e-07	0.029	219666_at	MS4A6A	membrane-spanning 4-domains, subfamily A, member 6A	64231	AW173504	Hs.76704	Oocyte meiosis, Pathways in cancer, Prostate cancer
< 1e-07	< 1e-07	0.065	223922_x_at	MS4A6A	membrane-spanning 4-domains, subfamily A, member 6A	64231	AB023430	Hs.581021	Osteoclast differentiation
< 1e-07	< 1e-07	0.0067	223343_at	MS4A7	membrane-spanning 4-domains, subfamily A, member 7	58475	AU151342	Hs.144333	Chaperones modulate interferon Signaling Pathway
< 1e-07	< 1e-07	0.05	223344_s_at	MS4A7	membrane-spanning 4-domains, subfamily A, member 7	58475	NM_002389	Hs.510402	Complement and coagulation cascades
4.03e-05	8.08e-05	0.2	224358_s_at	MS4A7	membrane-spanning 4-domains, subfamily A, member 7	58475	NM_014109	Hs.370834
< 1e-07	< 1e-07	0.085	214770_at	MSR1	macrophage scavenger receptor 1	4481	NM_016823	Hs.461896	CXCR4 Signaling Pathway, Signaling of Hepatocyte Growth Factor Receptor, Bacterial invasion of epithelial cells, Chemokine signaling pathway, Chronic myeloid leukemia, ErbB signaling pathway, Fc gamma R-mediated phagocytosis, Focal adhesion, Insulin signaling pathway, MAPK signaling pathway, Neurotrophin signaling pathway, Pathways in cancer, Regulation of actin cytoskeleton, Renal cell carcinoma…
< 1e-07	< 1e-07	0.17	217977_at	MSRB1	methionine sulfoxide reductase B1	51734	AI808395	Hs.471207	Alzheimer's disease, Huntington's disease, Metabolic pathways, Oxidative phosphorylation, Parkinson's disease
5.1e-06	1.22e-05	9.95	225782_at	MSRB3	methionine sulfoxide reductase B3	253827	NM_016817	Hs.414332	Hepatitis C
1.55e-05	3.34e-05	0.16	202086_at	MX1	MX dynamin-like GTPase 1	4599	NM_004113	Hs.390250	MAPK signaling pathway, Melanoma, Pathways in cancer, Regulation of actin cytoskeleton
< 1e-07	< 1e-07	0.055	204994_at	MX2	MX dynamin-like GTPase 2	4600	NM_005022	Hs.494691	Erk and PI-3 Kinase Are Necessary for Collagen Binding in Corneal Epithelia, Rho cell motility signaling pathway, Regulation of actin cytoskeleton, Shigellosis
< 1e-07	< 1e-07	0.054	226275_at	MXD1	MAX dimerization protein 1	4084	AF107495	Hs.584881
< 1e-07	< 1e-07	0.059	228846_at	MXD1	MAX dimerization protein 1	4084	NM_023068	Hs.31869	Cell adhesion molecules (CAMs)
9.7e-06	2.16e-05	0.15	206877_at	MXD1	MAX dimerization protein 1	4084	NM_018456	Hs.477325
< 1e-07	< 1e-07	33.74	209596_at	MXRA5	matrix-remodelling associated 5	25878	AL137655	Hs.744675
7.6e-06	1.75e-05	0.25	225673_at	MYADM	myeloid-associated differentiation marker	91663	NM_004895	Hs.159483	NOD-like receptor signaling pathway
< 1e-07	< 1e-07	0.18	209124_at	MYD88	myeloid differentiation primary response 88	4615	BF126155	Hs.143873
4.9e-06	1.18e-05	4.13	212372_at	MYH10	myosin, heavy chain 10, non-muscle	4628	AFFX-HSAC07/X00351_5	Hs.520640	Chromatin Remodeling by hSWI/SNF ATP-dependent Complexes, Adherens junction, Arrhythmogenic right ventricular cardiomyopathy (ARVC), Bacterial invasion of epithelial cells, Dilated cardiomyopathy, Focal adhesion, Gastric acid secretion, Hypertrophic cardiomyopathy (HCM), Leukocyte transendothelial migration, Pathogenic Escherichia coli infection, Phagosome, Regulation of actin cytoskeleton, Shige…
< 1e-07	< 1e-07	18.67	213067_at	MYH10	myosin, heavy chain 10, non-muscle	4628	NM_025092	Hs.353181
8.2e-06	1.86e-05	0.19	1555978_s_at	MYL12A	myosin, light chain 12A, regulatory, non-sarcomeric	10627	NM_018388	Hs.105134
4e-06	9.81e-06	0.23	1555977_at	MYL12A	myosin, light chain 12A, regulatory, non-sarcomeric	10627	N90866	Hs.276770
< 1e-07	< 1e-07	0.088	228097_at	MYLIP	myosin regulatory light chain interacting protein	29116	NM_004503	Hs.549040
9.7e-06	2.16e-05	6.74	224823_at	MYLK	myosin light chain kinase	4638	AF035594	Hs.531704	Activation of PKC through G protein coupled receptor, Activation of Src by Protein-tyrosine phosphatase alpha, Angiotensin II mediated activation of JNK Pathway via Pyk2 dependent signaling, Apoptotic Signaling in Response to DNA Damage, Aspirin Blocks Signaling Pathway Involved in Platelet Activation, Attenuation of GPCR Signaling, BCR Signaling Pathway, Bioactive Peptide Induced Signaling Pathw…
5e-07	1.53e-06	6.3	236718_at	MYO10	myosin X	4651	AV713062	Hs.432453	MAPKinase Signaling Pathway, MAPK signaling pathway, T cell receptor signaling pathway, Toll-like receptor signaling pathway
3.3e-06	8.29e-06	6.76	244350_at	MYO10	myosin X	4651	NM_006366	Hs.132902
< 1e-07	< 1e-07	12.31	216222_s_at	MYO10	myosin X	4651	NM_006669	Hs.667388	Osteoclast differentiation
< 1e-07	< 1e-07	0.02	213733_at	MYO1F	myosin IF	4542	AU157932	Hs.151220
< 1e-07	< 1e-07	0.097	244654_at	MYO1G	myosin IG	64005	AA418403	Hs.331268
< 1e-07	3.48e-07	10.26	225301_s_at	MYO5B	myosin VB	4645	BC005383	Hs.591767
1e-07	3.48e-07	11.32	225299_at	MYO5B	myosin VB	4645	AF189723	Hs.584884
0.0006833	0.0011	4.17	203215_s_at	MYO6	myosin VI	4646	BE439987	Hs.462214
4.79e-05	9.48e-05	4.76	203216_s_at	MYO6	myosin VI	4646	AW001026	Hs.509966
< 1e-07	< 1e-07	0.2	217297_s_at	MYO9B	myosin IXB	4650	NM_003405	Hs.226755	AKT Signaling Pathway, cdc25 and chk1 Regulatory Pathway in response to DNA damage, Cell Cycle: G2/M Checkpoint, Control of skeletal myogenesis by HDAC & calcium/calmodulin-dependent kinase (CaMK), Multiple antiapoptotic pathways from IGF-1R signaling lead to BAD phosphorylation, RB Tumor Suppressor/Checkpoint Signaling in response to DNA damage, Regulation of BAD phosphorylation, Regulation of c…
< 1e-07	< 1e-07	0.079	204860_s_at	NAIP	NLR family, apoptosis inhibitory protein	4671	NM_006855	Hs.745072	Vibrio cholerae infection
< 1e-07	< 1e-07	0.13	204861_s_at	NAIP	NLR family, apoptosis inhibitory protein	4671	NM_145240	Hs.497893	Regulation of actin cytoskeleton
< 1e-07	< 1e-07	0.024	1555167_s_at	NAMPT	nicotinamide phosphoribosyltransferase	10135	AL534095	Hs.647659
< 1e-07	< 1e-07	0.032	243296_at	NAMPT	nicotinamide phosphoribosyltransferase	10135	BF692332	Hs.369052
< 1e-07	< 1e-07	0.14	217738_at	NAMPT	nicotinamide phosphoribosyltransferase	10135	NM_000206	Hs.84	IL 2 signaling pathway, IL 4 signaling pathway, IL-2 Receptor Beta Chain in T cell Activation, Cytokine-cytokine receptor interaction, Endocytosis, Jak-STAT signaling pathway, Primary immunodeficiency
< 1e-07	< 1e-07	0.16	217739_s_at	NAMPT	nicotinamide phosphoribosyltransferase	10135	AA495984	Hs.496982
2e-06	5.25e-06	9.66	219368_at	NAP1L2	nucleosome assembly protein 1-like 2	4674	NM_002745	Hs.431850	Agrin in Postsynaptic Differentiation, Angiotensin II mediated activation of JNK Pathway via Pyk2 dependent signaling, Aspirin Blocks Signaling Pathway Involved in Platelet Activation, Bioactive Peptide Induced Signaling Pathway, Cadmium induces DNA synthesis and proliferation in macrophages, CCR3 signaling in Eosinophils, Ceramide Signaling Pathway, CXCR4 Signaling Pathway, Erk and PI-3 Kinase A…
7.4e-06	1.7e-05	4.6	228063_s_at	NAP1L5	nucleosome assembly protein 1-like 5	266812	AI278445	Hs.481720	Fc gamma R-mediated phagocytosis
3.21e-05	6.53e-05	4.78	224771_at	NAV1	neuron navigator 1	89796	BF000332	Hs.614080	Phagosome, Vasopressin-regulated water reabsorption
< 1e-07	< 1e-07	7.59	224772_at	NAV1	neuron navigator 1	89796	NM_001629	Hs.507658	Eicosanoid Metabolism
7e-07	2.07e-06	4.28	226439_s_at	NBEA	neurobeachin	26960	AW189467	Hs.492618	Glycosaminoglycan biosynthesis - heparan sulfate, Metabolic pathways
2e-07	6.63e-07	5.06	211685_s_at	NCALD	neurocalcin delta	83988	AA130132	Hs.298658
< 1e-07	< 1e-07	0.005	209949_at	NCF2	neutrophil cytosolic factor 2	4688	W60686	Hs.480938
< 1e-07	< 1e-07	0.025	238668_at	NCKAP1L	NCK-associated protein 1-like	3071	BE675435	Hs.4055
< 1e-07	< 1e-07	0.11	209734_at	NCKAP1L	NCK-associated protein 1-like	3071	CA448125	Hs.445239
4.5e-06	1.09e-05	7.01	224802_at	NDFIP2	Nedd4 family interacting protein 2	54602	NM_002614	Hs.444751	Downregulated of MTA-3 in ER-negative Breast Tumors
8e-07	2.34e-06	19.14	206022_at	NDP	Norrie disease (pseudoglioma)	4693	AK096036	Hs.656652
4e-07	1.25e-06	5.54	236356_at	NDUFS1	NADH dehydrogenase (ubiquinone) Fe-S protein 1, 75kDa (NADH-coenzyme Q reductase)	4719	CA447397	Hs.85201
< 1e-07	< 1e-07	7.81	203961_at	NEBL	nebulette	10529	AU158022	Hs.486458
4e-07	1.25e-06	4.28	213331_s_at	NEK1	NIMA-related kinase 1	4750	AW151360	Hs.525157	TACI and BCMA stimulation of B cell immune responses., Cytokine-cytokine receptor interaction, Intestinal immune network for IgA production, Rheumatoid arthritis
0.0008419	0.00134	5.21	226103_at	NEXN	nexilin (F actin binding protein)	91624	NM_018212	Hs.497893	Regulation of actin cytoskeleton
7.4e-06	1.7e-05	5.5	213029_at	NFIB	nuclear factor I/B	4781	N57931	Hs.504534
0.0002666	0.000461	5.63	213032_at	NFIB	nuclear factor I/B	4781	AF349719	Hs.633653
5.1e-05	0.000101	6.59	209289_at	NFIB	nuclear factor I/B	4781	AV707343	Hs.390250	MAPK signaling pathway, Melanoma, Pathways in cancer, Regulation of actin cytoskeleton
2.04e-05	4.3e-05	0.19	201502_s_at	NFKBIA	nuclear factor of kappa light polypeptide gene enhancer in B-cells inhibitor, alpha	4792	W92744	Hs.445019
2e-07	6.63e-07	0.1	223218_s_at	NFKBIZ	nuclear factor of kappa light polypeptide gene enhancer in B-cells inhibitor, zeta	64332	NM_005025	Hs.478153
4.42e-05	8.8e-05	0.14	223217_s_at	NFKBIZ	nuclear factor of kappa light polypeptide gene enhancer in B-cells inhibitor, zeta	64332	NM_002831	Hs.63489	EPO Signaling Pathway, Growth Hormone Signaling Pathway, IL 3 signaling pathway, IL-2 Receptor Beta Chain in T cell Activation, Ras-Independent pathway in NK cell-mediated cytotoxicity, Adherens junction, B cell receptor signaling pathway, Jak-STAT signaling pathway, Leishmaniasis, Natural killer cell mediated cytotoxicity, T cell receptor signaling pathway
1.1e-06	3.1e-06	6.04	228933_at	NHS	Nance-Horan syndrome (congenital cataracts and dental anomalies)	4810	AI373299	Hs.163555	Metabolic pathways, Pantothenate and CoA biosynthesis
0.0001567	0.000282	4.2	230864_at	NIM1K	NIM1 serine/threonine protein kinase	167359	NM_014350	Hs.618488
< 1e-07	< 1e-07	0.11	225921_at	NIN	ninein (GSK3B interacting protein)	51199	AI246710	Hs.491172
< 1e-07	3.48e-07	0.22	224304_x_at	NIN	ninein (GSK3B interacting protein)	51199	NM_006291	Hs.525607
< 1e-07	< 1e-07	0.11	213915_at	NKG7	natural killer cell granule protein 7	4818	AA912711	Hs.437422	Tight junction
4e-07	1.25e-06	0.1	207075_at	NLRP3	NLR family, pyrin domain containing 3	114548	AL445192	Hs.153310	Chemokine signaling pathway
1.23e-05	2.7e-05	5.87	202237_at	NNMT	nicotinamide N-methyltransferase	4837	AI633738
6.6e-06	1.54e-05	7.76	202238_s_at	NNMT	nicotinamide N-methyltransferase	4837	U11058	Hs.144795	Pancreatic secretion, Salivary secretion, Vascular smooth muscle contraction
< 1e-07	< 1e-07	0.089	220066_at	NOD2	nucleotide-binding oligomerization domain containing 2	64127	AI804932	Hs.716678
0.0002453	0.000429	4.13	226992_at	NOSTRIN	nitric oxide synthase trafficking	115677	NM_024966	Hs.511265	Axon guidance
< 1e-07	< 1e-07	0.23	218902_at	NOTCH1	notch 1	4851	NM_001196	Hs.591054	Apoptotic Signaling in Response to DNA Damage, HIV-I Nef: negative effector of Fas and TNF, Induction of apoptosis through DR3 and DR4/5 Death Receptors , Role of Mitochondria in Apoptotic Signaling, Alzheimer's disease, Amyotrophic lateral sclerosis (ALS), Apoptosis, Natural killer cell mediated cytotoxicity, p53 signaling pathway, Pathways in cancer, Viral myocarditis
8.2e-06	1.86e-05	4.25	201454_s_at	NPEPPS	aminopeptidase puromycin sensitive	9520	AI927944	Hs.144130
< 1e-07	< 1e-07	0.021	221210_s_at	NPL	N-acetylneuraminate pyruvate lyase (dihydrodipicolinate synthase)	80896	NM_001423	Hs.719042
< 1e-07	< 1e-07	0.057	223405_at	NPL	N-acetylneuraminate pyruvate lyase (dihydrodipicolinate synthase)	80896	U51869	Hs.4055
< 1e-07	< 1e-07	0.15	240440_at	NPL	N-acetylneuraminate pyruvate lyase (dihydrodipicolinate synthase)	80896	NM_006202	Hs.89901	Purine metabolism
4.94e-05	9.76e-05	6.92	219789_at	NPR3	natriuretic peptide receptor 3	4883	AU154202	Hs.460857	Ether lipid metabolism, Glycerophospholipid metabolism, Metabolic pathways
0.0002526	0.000441	4.31	205440_s_at	NPY1R	neuropeptide Y receptor Y1	4886	NM_006455	Hs.446459
0.0001916	0.000341	0.25	215073_s_at	NR2F2	nuclear receptor subfamily 2, group F, member 2	7026	BE327172	Hs.696684	Agrin in Postsynaptic Differentiation, Angiotensin II mediated activation of JNK Pathway via Pyk2 dependent signaling, ATM Signaling Pathway, BCR Signaling Pathway, Cadmium induces DNA synthesis and proliferation in macrophages, D4-GDI Signaling Pathway, EGF Signaling Pathway, EPO Signaling Pathway, FAS signaling pathway ( CD95 ), Fc Epsilon Receptor I Signaling in Mast Cells, Hypoxia-Inducible F…
5.3e-06	1.26e-05	0.16	232431_at	NR3C1	nuclear receptor subfamily 3, group C, member 1 (glucocorticoid receptor)	2908	NM_000099	Hs.304682	Salivary secretion
1e-06	2.86e-06	0.18	211671_s_at	NR3C1	nuclear receptor subfamily 3, group C, member 1 (glucocorticoid receptor)	2908	BE500942	Hs.648434
4.22e-05	8.43e-05	0.18	202340_x_at	NR4A1	nuclear receptor subfamily 4, group A, member 1	3164	W72060	Hs.304475	Fc epsilon RI signaling pathway, Natural killer cell mediated cytotoxicity, Osteoclast differentiation, T cell receptor signaling pathway
< 1e-07	< 1e-07	0.031	204621_s_at	NR4A2	nuclear receptor subfamily 4, group A, member 2	4929	BE677761	Hs.596025
< 1e-07	< 1e-07	0.05	216248_s_at	NR4A2	nuclear receptor subfamily 4, group A, member 2	4929	NM_016235	Hs.148685
< 1e-07	< 1e-07	0.072	204622_x_at	NR4A2	nuclear receptor subfamily 4, group A, member 2	4929	NM_018563	Hs.435949
< 1e-07	< 1e-07	0.12	223650_s_at	NRBF2	nuclear receptor binding factor 2	29982	AW237462	Hs.127951
1e-07	3.48e-07	0.068	204081_at	NRGN	neurogranin (protein kinase C substrate, RC3)	4900	BG537255	Hs.515210	Hypoxia and p53 in the Cardiovascular system, Prion Pathway, Protein processing in endoplasmic reticulum
1e-07	3.48e-07	5.35	222900_at	NRIP3	nuclear receptor interacting protein 3	56675	AK001684	Hs.584884
< 1e-07	< 1e-07	19.98	219557_s_at	NRIP3	nuclear receptor interacting protein 3	56675	AW236803	Hs.24321	Ion Channels and Their Functional Role in Vascular Endothelium, Gap junction, Long-term depression, Purine metabolism, Salivary secretion, Vascular smooth muscle contraction
< 1e-07	3.48e-07	8.57	227971_at	NRK	Nik related kinase	203447	BG257762	Hs.518265
0.0006497	0.00105	6.11	222877_at	NRP2	neuropilin 2	8828	AI806633	Hs.468801
1.3e-06	3.6e-06	6.16	225566_at	NRP2	neuropilin 2	8828	NM_005978	Hs.516484
1.5e-06	4.09e-06	0.13	235359_at	NRROS	negative regulator of reactive oxygen species	375387	BC002585	Hs.115325
0.0001482	0.000268	4.12	229649_at	NRXN3	neurexin 3	9369	AA181060	Hs.349283
< 1e-07	< 1e-07	4.66	235830_at	NT5DC1	5'-nucleotidase domain containing 1	221294	AI023398	Hs.655552	ADP-Ribosylation Factor, Endocytosis, Fc gamma R-mediated phagocytosis
1e-07	3.48e-07	10.22	223178_s_at	NT5DC1	5'-nucleotidase domain containing 1	221294	NM_000266	Hs.522615
5.81e-05	0.000113	6.71	1553994_at	NT5E	5'-nucleotidase, ecto (CD73)	4907	AF087853	Hs.110571	Cell cycle, MAPK signaling pathway, p53 signaling pathway
5.5e-06	1.31e-05	0.24	213061_s_at	NTAN1	N-terminal asparagine amidase	123803	AI334297	Hs.505104
< 1e-07	< 1e-07	9.67	223315_at	NTN4	netrin 4	59277	NM_018340	Hs.460002
1.1e-06	3.1e-06	0.048	206291_at	NTS	neurotensin	4922	NM_016361	Hs.562154	Riboflavin metabolism
< 1e-07	< 1e-07	38.04	204589_at	NUAK1	NUAK family, SNF1-like kinase, 1	9891	NM_018586	Hs.596025
9e-07	2.6e-06	4.4	222027_at	NUCKS1	nuclear casein kinase and cyclin-dependent kinase substrate 1	64710	AF167438	Hs.719925	Metabolic pathways, Retinol metabolism
< 1e-07	< 1e-07	0.12	202869_at	OAS1	2'-5'-oligoadenylate synthetase 1, 40/46kDa	4938	N48613	Hs.582993
< 1e-07	3.48e-07	0.13	205552_s_at	OAS1	2'-5'-oligoadenylate synthetase 1, 40/46kDa	4938	AF026850	Hs.28326	Metabolic pathways, Oxidative phosphorylation, Porphyrin and chlorophyll metabolism
4e-07	1.25e-06	0.11	204972_at	OAS2	2'-5'-oligoadenylate synthetase 2, 69/71kDa	4939	W67644	Hs.150580	Eukaryotic protein translation, VEGF, Hypoxia, and Angiogenesis, RNA transport
5.43e-05	0.000106	0.23	205660_at	OASL	2'-5'-oligoadenylate synthetase-like	8638	NM_002318	Hs.626637
< 1e-07	< 1e-07	4.08	206498_at	OCA2	oculocutaneous albinism II	4948	AF285837	Hs.298658
2.86e-05	5.86e-05	0.23	201282_at	OGDH	oxoglutarate (alpha-ketoglutarate) dehydrogenase (lipoamide)	4967	BC027960	Hs.262886	B cell receptor signaling pathway, Fc epsilon RI signaling pathway, Fc gamma R-mediated phagocytosis, Insulin signaling pathway, Phosphatidylinositol signaling system
< 1e-07	< 1e-07	0.17	219582_at	OGFRL1	opioid growth factor receptor-like 1	79627	AL514445	Hs.386726
7e-07	2.07e-06	0.2	226810_at	OGFRL1	opioid growth factor receptor-like 1	79627	AK021890	Hs.19156	Wnt signaling pathway
< 1e-07	< 1e-07	0.23	238469_at	OGFRL1	opioid growth factor receptor-like 1	79627	N95026	Hs.282998
< 1e-07	< 1e-07	0.12	213125_at	OLFML2B	olfactomedin-like 2B	25903	AW515443	Hs.213061
< 1e-07	< 1e-07	0.088	230170_at	OSM	oncostatin M	5008	AI693140	Hs.22907	Glycosaminoglycan biosynthesis - chondroitin sulfate, Glycosaminoglycan biosynthesis - heparan sulfate, Metabolic pathways
< 1e-07	< 1e-07	0.17	231035_s_at	OTUD1	OTU deubiquitinase 1	220213	AW770245	Hs.314261
1e-07	3.48e-07	0.21	226140_s_at	OTUD1	OTU deubiquitinase 1	220213	NM_016839	Hs.470412
< 1e-07	< 1e-07	0.17	210448_s_at	P2RX5	purinergic receptor P2X, ligand gated ion channel, 5	5026	AI289311	Hs.655832
< 1e-07	< 1e-07	0.022	220005_at	P2RY13	purinergic receptor P2Y, G-protein coupled, 13	53829	AL136653	Hs.93675
< 1e-07	< 1e-07	0.044	206637_at	P2RY14	purinergic receptor P2Y, G-protein coupled, 14	9934	BG170478	Hs.446271
< 1e-07	< 1e-07	0.088	229686_at	P2RY8	purinergic receptor P2Y, G-protein coupled, 8	286530	D87433	Hs.301989
< 1e-07	< 1e-07	4.91	218717_s_at	P3H2	prolyl 3-hydroxylase 2	55214	N63005	Hs.21375	Cell to Cell Adhesion Signaling, Adherens junction, Arrhythmogenic right ventricular cardiomyopathy (ARVC), Bacterial invasion of epithelial cells, Endometrial cancer, Leukocyte transendothelial migration, Pathways in cancer, Tight junction
7e-07	2.07e-06	5.27	204078_at	P3H4	prolyl 3-hydroxylase family member 4 (non-enzymatic)	10609	U01351	Hs.122926	Chromatin Remodeling by hSWI/SNF ATP-dependent Complexes, Corticosteroids and cardioprotection, NFkB activation by Nontypeable Hemophilus influenzae, Visceral Fat Deposits and the Metabolic Syndrome, Neuroactive ligand-receptor interaction
1.39e-05	3.02e-05	4.39	202733_at	P4HA2	prolyl 4-hydroxylase, alpha polypeptide II	8974	H09620	Hs.23783
< 1e-07	3.48e-07	5.06	201014_s_at	PAICS	phosphoribosylaminoimidazole carboxylase, phosphoribosylaminoimidazole succinocarboxamide synthetase	10606	BC000314	Hs.368626
< 1e-07	< 1e-07	0.15	208876_s_at	PAK2	p21 protein (Cdc42/Rac)-activated kinase 2	5062	BF526175	Hs.167700	ALK in cardiac myocytes, CTCF: First Multivalent Nuclear Factor, TGF-beta signaling pathway
< 1e-07	< 1e-07	5.19	200897_s_at	PALLD	palladin, cytoskeletal associated protein	23022	M64497	Hs.347991
5e-07	1.53e-06	5.22	200907_s_at	PALLD	palladin, cytoskeletal associated protein	23022	AF105366	Hs.510939
5.6e-06	1.33e-05	5.75	200906_s_at	PALLD	palladin, cytoskeletal associated protein	23022	NM_006183	Hs.80962
7e-07	2.07e-06	4.6	226649_at	PANK1	pantothenate kinase 1	53354	AW008627	Hs.502223	Protein export
0.0001147	0.000212	6.14	1559400_s_at	PAPPA	pregnancy-associated plasma protein A, pappalysin 1	5069	AF288391	Hs.518662
4.75e-05	9.41e-05	6.23	242871_at	PAQR5	progestin and adipoQ receptor family member V	54852	AU146004	Hs.482017
< 1e-07	< 1e-07	11.09	228411_at	PARD3B	par-3 family cell polarity regulator beta	117583	NM_005544	Hs.471508	Growth Hormone Signaling Pathway, IGF-1 Signaling Pathway, IL 4 signaling pathway, IL-2 Receptor Beta Chain in T cell Activation, Insulin Signaling Pathway, Multiple antiapoptotic pathways from IGF-1R signaling lead to BAD phosphorylation, Regulation of eIF4e and p70 S6 Kinase, Adipocytokine signaling pathway, Aldosterone-regulated sodium reabsorption, Insulin signaling pathway, Neurotrophin sign…
< 1e-07	< 1e-07	0.12	223562_at	PARVG	parvin, gamma	64098	AF130113	Hs.522666	Hemoglobin Chaperone, Glycine, serine and threonine metabolism, Metabolic pathways, Porphyrin and chlorophyll metabolism
3e-07	9.59e-07	0.14	233510_s_at	PARVG	parvin, gamma	64098	AI760252	Hs.2799
< 1e-07	3.48e-07	7.69	227289_at	PCDH17	protocadherin 17	27253	AL137725	Hs.200412
< 1e-07	< 1e-07	9.31	228863_at	PCDH17	protocadherin 17	27253	AI052257	Hs.33368
2.1e-06	5.49e-06	0.093	227935_s_at	PCGF5	polycomb group ring finger 5	84333	NM_003588	Hs.102914	Nucleotide excision repair, Ubiquitin mediated proteolysis
7e-07	2.07e-06	0.21	204735_at	PDE4A	phosphodiesterase 4A, cAMP-specific	5141	BG249599	Hs.593382
< 1e-07	< 1e-07	0.02	203708_at	PDE4B	phosphodiesterase 4B, cAMP-specific	5142	BC000323	Hs.409065	Base excision repair, DNA replication, Non-homologous end-joining
3e-07	9.59e-07	0.06	211302_s_at	PDE4B	phosphodiesterase 4B, cAMP-specific	5142	NM_012110	Hs.335393
< 1e-07	< 1e-07	0.1	215671_at	PDE4B	phosphodiesterase 4B, cAMP-specific	5142	NM_001884	Hs.2799
1.2e-06	3.35e-06	6.48	218718_at	PDGFC	platelet derived growth factor C	56034	AF225981	Hs.584884
8e-07	2.34e-06	4.15	227255_at	PDIK1L	PDLIM1 interacting kinase 1 like	149420	AI378026	Hs.243564	Natural killer cell mediated cytotoxicity
2.3e-06	5.97e-06	0.19	225207_at	PDK4	pyruvate dehydrogenase kinase, isozyme 4	5166	NM_021122	Hs.406678	Adipocytokine signaling pathway, Fatty acid metabolism, Metabolic pathways, Peroxisome, PPAR signaling pathway
6e-07	1.81e-06	7.04	205380_at	PDZK1	PDZ domain containing 1	5174	N93399	Hs.494406	Axon guidance
1.07e-05	2.37e-05	0.15	200787_s_at	PEA15	phosphoprotein enriched in astrocytes 15	8682	AB032983	Hs.435479
< 1e-07	< 1e-07	0.022	208982_at	PECAM1	platelet/endothelial cell adhesion molecule 1	5175	BF111819	Hs.201623
< 1e-07	< 1e-07	0.025	208981_at	PECAM1	platelet/endothelial cell adhesion molecule 1	5175	BE503640	Hs.655747
< 1e-07	< 1e-07	0.09	208983_s_at	PECAM1	platelet/endothelial cell adhesion molecule 1	5175	BU676221	Hs.190086	Focal adhesion, Leukocyte transendothelial migration, Regulation of actin cytoskeleton, Tight junction
< 1e-07	< 1e-07	0.17	1558397_at	PECAM1	platelet/endothelial cell adhesion molecule 1	5175	BC037341	Hs.655152	Metabolic pathways, Mucin type O-Glycan biosynthesis
2.5e-06	6.43e-06	8.13	230068_s_at	PEG3-AS1	PEG3 antisense RNA 1	100169890	R41459	Hs.499108
< 1e-07	< 1e-07	0.038	232304_at	PELI1	pellino E3 ubiquitin protein ligase 1	57162	X95425	Hs.654492	Axon guidance
< 1e-07	< 1e-07	0.038	232213_at	PELI1	pellino E3 ubiquitin protein ligase 1	57162	AV725248	Hs.584775	Wnt signaling pathway
< 1e-07	< 1e-07	0.22	218319_at	PELI1	pellino E3 ubiquitin protein ligase 1	57162	AK026966	Hs.10862	Metabolic pathways, Purine metabolism
5.6e-06	1.33e-05	4.21	1556009_at	PEX13	peroxisomal biogenesis factor 13	5194	BF511091	Hs.75231
< 1e-07	< 1e-07	0.077	206390_x_at	PF4	platelet factor 4	5196	NM_004323	Hs.377484	Protein processing in endoplasmic reticulum
4e-07	1.25e-06	0.1	200634_at	PFN1	profilin 1	5216	AI797080	Hs.644231	Keratinocyte Differentiation, METS affect on Macrophage Differentiation, Dorso-ventral axis formation
< 1e-07	< 1e-07	5.14	219225_at	PGBD5	piggyBac transposable element derived 5	79605	BE504979	Hs.143728	How does salmonella hijack a cell, Role of PI3K subunit p85 in regulation of Actin Organization and Cell Migration, Y branching of actin filaments, Adherens junction, Bacterial invasion of epithelial cells, Chemokine signaling pathway, Fc gamma R-mediated phagocytosis, Pathogenic Escherichia coli infection, Regulation of actin cytoskeleton, Shigellosis
6.15e-05	0.000119	4.38	201397_at	PHGDH	phosphoglycerate dehydrogenase	26227	BF438386	Hs.25318	Pancreatic secretion
< 1e-07	< 1e-07	0.12	215236_s_at	PICALM	phosphatidylinositol binding clathrin assembly protein	8301	AL534095	Hs.647659
4.8e-06	1.16e-05	7.5	219602_s_at	PIEZO2	piezo-type mechanosensitive ion channel component 2	63895	NM_002090	Hs.89690	Chemokine signaling pathway, Cytokine-cytokine receptor interaction
1.25e-05	2.74e-05	4.37	209707_at	PIGK	phosphatidylinositol glycan anchor biosynthesis, class K	10026	AF226732	Hs.488827
< 1e-07	< 1e-07	0.016	226459_at	PIK3AP1	phosphoinositide-3-kinase adaptor protein 1	118788	AF119911	Hs.529862	NFAT and Hypertrophy of the heart (Transcription in the broken heart), Hedgehog signaling pathway, Wnt signaling pathway
< 1e-07	< 1e-07	0.09	203879_at	PIK3CD	phosphatidylinositol-4,5-bisphosphate 3-kinase, catalytic subunit delta	5293	AL136710	Hs.499725
< 1e-07	< 1e-07	0.035	239294_at	PIK3CG	phosphatidylinositol-4,5-bisphosphate 3-kinase, catalytic subunit gamma	5294	AV704610	Hs.529862	NFAT and Hypertrophy of the heart (Transcription in the broken heart), Hedgehog signaling pathway, Wnt signaling pathway
< 1e-07	< 1e-07	0.063	227645_at	PIK3R5	phosphoinositide-3-kinase, regulatory subunit 5	23533	AW451432	Hs.499725
1.8e-06	4.8e-06	0.12	222218_s_at	PILRA	paired immunoglobin-like type 2 receptor alpha	29992	AL137725	Hs.200412
8.9e-06	2.01e-05	0.15	219788_at	PILRA	paired immunoglobin-like type 2 receptor alpha	29992	AI799018	Hs.371218	Eph Kinases and ephrins support platelet aggregation, Axon guidance
< 1e-07	< 1e-07	0.22	219155_at	PITPNC1	phosphatidylinositol transfer protein, cytoplasmic 1	26207	AB051826	Hs.647774
9.7e-06	2.16e-05	4.42	226864_at	PKIA	protein kinase (cAMP-dependent, catalytic) inhibitor alpha	5569	NM_002246	Hs.645288
2.3e-06	5.97e-06	0.12	210145_at	PLA2G4A	phospholipase A2, group IVA (cytosolic, calcium-dependent)	5321	BG340967	Hs.24379
< 1e-07	< 1e-07	0.15	206214_at	PLA2G7	phospholipase A2, group VII (platelet-activating factor acetylhydrolase, plasma)	7941	AI024869	Hs.744981
2e-07	6.63e-07	0.12	219014_at	PLAC8	placenta-specific 8	51316	W95007	Hs.268785	Adipocytokine signaling pathway, Fatty acid metabolism, Metabolic pathways, Peroxisome, PPAR signaling pathway
1e-07	3.48e-07	0.22	205479_s_at	PLAU	plasminogen activator, urokinase	5328	NM_001747	Hs.516155
< 1e-07	< 1e-07	0.088	210845_s_at	PLAUR	plasminogen activator, urokinase receptor	5329	AF454915	Hs.584940
3e-07	9.59e-07	0.091	211924_s_at	PLAUR	plasminogen activator, urokinase receptor	5329	AI928203	Hs.437039	ChREBP regulation by carbohydrates and cAMP, Reversal of Insulin Resistance by Leptin, Adipocytokine signaling pathway, Hypertrophic cardiomyopathy (HCM), Insulin signaling pathway, mTOR signaling pathway, Regulation of autophagy
< 1e-07	< 1e-07	0.022	218454_at	PLBD1	phospholipase B domain containing 1	79887	AFFX-HSAC07/X00351_3	Hs.520640	Chromatin Remodeling by hSWI/SNF ATP-dependent Complexes, Adherens junction, Arrhythmogenic right ventricular cardiomyopathy (ARVC), Bacterial invasion of epithelial cells, Dilated cardiomyopathy, Focal adhesion, Gastric acid secretion, Hypertrophic cardiomyopathy (HCM), Leukocyte transendothelial migration, Pathogenic Escherichia coli infection, Phagosome, Regulation of actin cytoskeleton, Shige…
< 1e-07	< 1e-07	0.06	230917_at	PLCG2	phospholipase C, gamma 2 (phosphatidylinositol-specific)	5336	AL833150	Hs.327631
< 1e-07	< 1e-07	0.14	204613_at	PLCG2	phospholipase C, gamma 2 (phosphatidylinositol-specific)	5336	U25975	Hs.518530	Agrin in Postsynaptic Differentiation, FAS signaling pathway ( CD95 ), Fc Epsilon Receptor I Signaling in Mast Cells, HIV-I Nef: negative effector of Fas and TNF, MAPKinase Signaling Pathway, TNFR1 Signaling Pathway, Axon guidance, ErbB signaling pathway, Focal adhesion, MAPK signaling pathway, Regulation of actin cytoskeleton, Renal cell carcinoma, T cell receptor signaling pathway
< 1e-07	< 1e-07	0.1	216218_s_at	PLCL2	phospholipase C-like 2	23228	Z25430	Hs.472838	MAPK signaling pathway, Non-small cell lung cancer, Pathways in cancer
< 1e-07	< 1e-07	0.13	213309_at	PLCL2	phospholipase C-like 2	23228	BC007010	Hs.458355	Classical Complement Pathway, Complement Pathway, Complement and coagulation cascades, Staphylococcus aureus infection, Systemic lupus erythematosus
< 1e-07	< 1e-07	0.009	203471_s_at	PLEK	pleckstrin	5341	AW082668	Hs.471779
7.8e-06	1.79e-05	0.19	203470_s_at	PLEK	pleckstrin	5341	BF059512	Hs.234074
5.15e-05	0.000101	0.18	218223_s_at	PLEKHO1	pleckstrin homology domain containing, family O member 1	51177	H10661	Hs.593134
< 1e-07	< 1e-07	0.21	204436_at	PLEKHO2	pleckstrin homology domain containing, family O member 2	80301	NM_020125	Hs.438683
< 1e-07	< 1e-07	15.39	202620_s_at	PLOD2	procollagen-lysine, 2-oxoglutarate 5-dioxygenase 2	5352	AL574184	Hs.596913
< 1e-07	< 1e-07	15.47	202619_s_at	PLOD2	procollagen-lysine, 2-oxoglutarate 5-dioxygenase 2	5352	NM_001964	Hs.326035	Phosphorylation of MEK1 by cdk5/p35 down regulates the MAP kinase pathway, Prion diseases
2e-07	6.63e-07	0.075	210198_s_at	PLP1	proteolipid protein 1	5354	NM_002541	Hs.488181	Citrate cycle (TCA cycle), Lysine degradation, Metabolic pathways, Tryptophan metabolism
6.98e-05	0.000134	4.33	201215_at	PLS3	plastin 3	5358	BC031525	Hs.654514	Activation of Csk by cAMP-dependent Protein Kinase Inhibits Signaling through the T Cell Receptor, B Lymphocyte Cell Surface Molecules, Lck and Fyn tyrosine kinases in initiation of TCR Activation, T Cytotoxic Cell Surface Molecules, T Helper Cell Surface Molecules, Cell adhesion molecules (CAMs), Fc gamma R-mediated phagocytosis, Primary immunodeficiency, T cell receptor signaling pathway
3.3e-06	8.29e-06	4.06	214807_at	PLXDC2	plexin domain containing 2	84898	M80927	Hs.382202	Amino sugar and nucleotide sugar metabolism
< 1e-07	< 1e-07	0.21	227749_at	POU2F2	POU class 2 homeobox 2	5452	AI650819	Hs.102914	Nucleotide excision repair, Ubiquitin mediated proteolysis
< 1e-07	< 1e-07	0.011	214146_s_at	PPBP	pro-platelet basic protein (chemokine (C-X-C motif) ligand 7)	5473	AI475902	Hs.46506
1.9e-06	5.04e-06	0.23	233571_x_at	PPDPF	pancreatic progenitor cell differentiation and proliferation factor	79144	NM_004657	Hs.26530
2.2e-06	5.73e-06	6.51	214375_at	PPFIBP1	PTPRF interacting protein, binding protein 1 (liprin beta 1)	8496	M55905	Hs.233119	Pyruvate metabolism
< 1e-07	3.48e-07	0.22	212841_s_at	PPFIBP2	PTPRF interacting protein, binding protein 2 (liprin beta 2)	8495	BF433749	Hs.21375	Cell to Cell Adhesion Signaling, Adherens junction, Arrhythmogenic right ventricular cardiomyopathy (ARVC), Bacterial invasion of epithelial cells, Endometrial cancer, Leukocyte transendothelial migration, Pathways in cancer, Tight junction
1.1e-06	3.1e-06	0.2	212686_at	PPM1H	protein phosphatase, Mg2+/Mn2+ dependent, 1H	57460	AL533352	Hs.488827
0.000981	0.00154	0.17	228108_at	PPM1L	protein phosphatase, Mg2+/Mn2+ dependent, 1L	151742	AI937060	Hs.585374
1.93e-05	4.09e-05	0.19	1566303_s_at	PPP1R11	protein phosphatase 1, regulatory (inhibitor) subunit 11	6992	NM_005101	Hs.458485	RIG-I-like receptor signaling pathway
1.74e-05	3.72e-05	4.09	201957_at	PPP1R12B	protein phosphatase 1, regulatory subunit 12B	4660	BG149337	Hs.618488
7.7e-06	1.77e-05	5.63	226907_at	PPP1R14C	protein phosphatase 1, regulatory (inhibitor) subunit 14C	81706	NM_003937	Hs.470126	Metabolic pathways, Tryptophan metabolism
1.88e-05	3.99e-05	0.14	202014_at	PPP1R15A	protein phosphatase 1, regulatory subunit 15A	23645	NM_002957	Hs.590886	Basic mechanism of action of PPARa, PPARb(d) and PPARg and effects on gene expression, Control of Gene Expression by Vitamin D Receptor, Degradation of the RAR and RXR by the proteasome, FXR and LXR Regulation of Cholesterol Metabolism, Map Kinase Inactivation of SMRT Corepressor, Mechanism of Gene Regulation by Peroxisome Proliferators via PPARa(alpha), Nuclear receptors coordinate the activitie…
3e-06	7.61e-06	0.15	37028_at	PPP1R15A	protein phosphatase 1, regulatory subunit 15A	23645	AF053640	Hs.90073
< 1e-07	< 1e-07	0.072	224927_at	PPP1R18	protein phosphatase 1, regulatory subunit 18	170954	NM_001953	Hs.180903	Bladder cancer, Drug metabolism - other enzymes, Metabolic pathways, Pyrimidine metabolism
3.6e-05	7.28e-05	6.97	204284_at	PPP1R3C	protein phosphatase 1, regulatory subunit 3C	5507	BF967997	Hs.448972
< 1e-07	< 1e-07	0.2	1554365_a_at	PPP2R5C	protein phosphatase 2, regulatory subunit B', gamma	5527	NM_001718	Hs.285671	Hedgehog signaling pathway, TGF-beta signaling pathway
< 1e-07	< 1e-07	0.091	241742_at	PRAM1	PML-RARA regulated adaptor molecule 1	84106	AI743557	Hs.586279	Chemokine signaling pathway, Regulation of actin cytoskeleton
< 1e-07	< 1e-07	0.21	228964_at	PRDM1	PR domain containing 1, with ZNF domain	639	H06509	Hs.92423
9e-07	2.6e-06	5.43	236513_at	PRELID2	PRELI domain containing 2	153768	N26005	Hs.303090	Insulin signaling pathway
2e-07	6.63e-07	4.16	212215_at	PREPL	prolyl endopeptidase-like	9581	AI675558	Hs.181867
< 1e-07	< 1e-07	0.12	224909_s_at	PREX1	phosphatidylinositol-3,4,5-trisphosphate-dependent Rac exchange factor 1	57580	AW264036	Hs.478588
7e-07	2.07e-06	0.23	224925_at	PREX1	phosphatidylinositol-3,4,5-trisphosphate-dependent Rac exchange factor 1	57580	BF508344	Hs.507676
< 1e-07	< 1e-07	0.05	214617_at	PRF1	perforin 1 (pore forming protein)	5551	AI830490	Hs.1466	Glycerolipid metabolism, Metabolic pathways, PPAR signaling pathway
2e-06	5.25e-06	4.57	227892_at	PRKAA2	protein kinase, AMP-activated, alpha 2 catalytic subunit	5563	NM_014254	Hs.216386
2.61e-05	5.39e-05	5.05	238441_at	PRKAA2	protein kinase, AMP-activated, alpha 2 catalytic subunit	5563	AW291402	Hs.282787
2e-07	6.63e-07	4.43	213093_at	PRKCA	protein kinase C, alpha	5578	R49343	Hs.335614
5e-07	1.53e-06	4.98	215195_at	PRKCA	protein kinase C, alpha	5578	AA969194	Hs.145150
< 1e-07	< 1e-07	0.054	209685_s_at	PRKCB	protein kinase C, beta	5579	BF339566	Hs.585374
< 1e-07	< 1e-07	0.06	207957_s_at	PRKCB	protein kinase C, beta	5579	AA883074	Hs.449628
< 1e-07	< 1e-07	0.17	227817_at	PRKCB	protein kinase C, beta	5579	AF237916	Hs.530735
0.0001253	0.00023	0.22	202545_at	PRKCD	protein kinase C, delta	5580	AL049246	Hs.144130
1.95e-05	4.12e-05	8.93	235874_at	PRSS35	protease, serine, 35	167681	BG111168	Hs.520046
4.82e-05	9.53e-05	13.74	223062_s_at	PSAT1	phosphoserine aminotransferase 1	29968	NM_022047	Hs.15476
< 1e-07	< 1e-07	7.97	218613_at	PSD3	pleckstrin and Sec7 domain containing 3	23362	AW001618	Hs.372050
< 1e-07	< 1e-07	13.98	203355_s_at	PSD3	pleckstrin and Sec7 domain containing 3	23362	AW235061	Hs.444915	Protein digestion and absorption
< 1e-07	< 1e-07	17.9	203354_s_at	PSD3	pleckstrin and Sec7 domain containing 3	23362	BF436898	Hs.504765	Dorso-ventral axis formation
< 1e-07	< 1e-07	0.1	1555852_at	PSMB8-AS1	PSMB8 antisense RNA 1 (head to head)	100507463	NM_003812	Hs.370287
< 1e-07	< 1e-07	4.3	212222_at	PSME4	proteasome (prosome, macropain) activator subunit 4	23198	AA579773	Hs.268874
7.4e-06	1.7e-05	6.37	212220_at	PSME4	proteasome (prosome, macropain) activator subunit 4	23198	AI692428	Hs.19385
< 1e-07	< 1e-07	0.11	227184_at	PTAFR	platelet-activating factor receptor	5724	NM_002135	Hs.524430	MAPK signaling pathway
< 1e-07	< 1e-07	0.026	204897_at	PTGER4	prostaglandin E receptor 4 (subtype EP4)	5734	NM_003971	Hs.463439
9.5e-06	2.12e-05	4.83	208131_s_at	PTGIS	prostaglandin I2 (prostacyclin) synthase	5740	BE379393	Hs.444277
< 1e-07	< 1e-07	4.97	231897_at	PTGR1	prostaglandin reductase 1	22949	AA909044	Hs.380906
< 1e-07	< 1e-07	0.16	215813_s_at	PTGS1	prostaglandin-endoperoxide synthase 1 (prostaglandin G/H synthase and cyclooxygenase)	5742	AJ131244	Hs.595540	Protein processing in endoplasmic reticulum
< 1e-07	< 1e-07	0.17	205128_x_at	PTGS1	prostaglandin-endoperoxide synthase 1 (prostaglandin G/H synthase and cyclooxygenase)	5742	BE646573	Hs.319171
< 1e-07	< 1e-07	0.19	238669_at	PTGS1	prostaglandin-endoperoxide synthase 1 (prostaglandin G/H synthase and cyclooxygenase)	5742	U07802	Hs.503093
< 1e-07	< 1e-07	0.011	1554997_a_at	PTGS2	prostaglandin-endoperoxide synthase 2 (prostaglandin G/H synthase and cyclooxygenase)	5743	NM_001444	Hs.408061	PPAR signaling pathway
< 1e-07	< 1e-07	0.013	204748_at	PTGS2	prostaglandin-endoperoxide synthase 2 (prostaglandin G/H synthase and cyclooxygenase)	5743	AL078459	Hs.713411
0.00023	0.000404	4.25	210355_at	PTHLH	parathyroid hormone-like hormone	5744	M55580	Hs.28491	Arginine and proline metabolism, Metabolic pathways
7e-07	2.07e-06	0.11	206687_s_at	PTPN6	protein tyrosine phosphatase, non-receptor type 6	5777	NM_013437	Hs.600630
< 1e-07	< 1e-07	0.0048	212588_at	PTPRC	protein tyrosine phosphatase, receptor type, C	5788	T15777	Hs.492314	Lysosome
< 1e-07	< 1e-07	0.0093	207238_s_at	PTPRC	protein tyrosine phosphatase, receptor type, C	5788	AI934557	Hs.591096	How Progesterone Initiates the Oocyte Maturation
< 1e-07	< 1e-07	0.023	212587_s_at	PTPRC	protein tyrosine phosphatase, receptor type, C	5788	BC003395	Hs.518773	Protein processing in endoplasmic reticulum, Ubiquitin mediated proteolysis
1e-07	3.48e-07	7.26	214043_at	PTPRD	protein tyrosine phosphatase, receptor type, D	5789	NM_130759	Hs.647079
< 1e-07	< 1e-07	0.083	1559018_at	PTPRE	protein tyrosine phosphatase, receptor type, E	5791	NM_004999	Hs.149387
5.4e-06	1.29e-05	0.14	221840_at	PTPRE	protein tyrosine phosphatase, receptor type, E	5791	BC004863	Hs.494261	Glycine, serine and threonine metabolism, Metabolic pathways, Vitamin B6 metabolism
0.0007452	0.0012	0.17	1569323_at	PTPRG	protein tyrosine phosphatase, receptor type, G	5793	BF448315	Hs.124366
< 1e-07	< 1e-07	0.051	227396_at	PTPRJ	protein tyrosine phosphatase, receptor type, J	5795	AI628360	Hs.13528
< 1e-07	< 1e-07	0.06	221666_s_at	PYCARD	PYD and CARD domain containing	29108	D13891	Hs.180919	TGF-beta signaling pathway
2e-07	6.63e-07	0.2	202990_at	PYGL	phosphorylase, glycogen, liver	5836	NM_006751	Hs.196983
0.0001212	0.000223	0.19	221764_at	R3HDM4	R3H domain containing 4	91300	NM_018423	Hs.24979
< 1e-07	< 1e-07	0.17	219681_s_at	RAB11FIP1	RAB11 family interacting protein 1 (class I)	80223	AF157319	Hs.440776
2.4e-05	5e-05	6.09	228708_at	RAB27B	RAB27B, member RAS oncogene family	5874	AI700518	Hs.644095
8e-07	2.34e-06	0.18	218700_s_at	RAB29	RAB29, member RAS oncogene family	8934	NM_016274	Hs.438824
< 1e-07	< 1e-07	4.36	229072_at	RAB30	RAB30, member RAS oncogene family	27314	NM_000103	Hs.260074	Metabolic pathways, Steroid hormone biosynthesis
< 1e-07	< 1e-07	0.24	228113_at	RAB37	RAB37, member RAS oncogene family	326624	AA977197	Hs.502223	Protein export
< 1e-07	< 1e-07	4.2	227123_at	RAB3B	RAB3B, member RAS oncogene family	5865	BC001863	Hs.706124
< 1e-07	< 1e-07	0.19	225001_at	RAB3D	RAB3D, member RAS oncogene family	9545	L36675	Hs.21374	Alpha-synuclein and Parkin-mediated proteolysis in Parkinson disease, Role of Parkin in the Ubiquitin-Proteasomal Pathway, Alzheimer's disease, Parkinson's disease
< 1e-07	< 1e-07	0.22	201156_s_at	RAB5C	RAB5C, member RAS oncogene family	5878	BE251303	Hs.515162	NFAT and Hypertrophy of the heart (Transcription in the broken heart), Antigen processing and presentation, Chagas disease (American trypanosomiasis), Phagosome, Protein processing in endoplasmic reticulum
< 1e-07	< 1e-07	5.47	222918_at	RAB9B	RAB9B, member RAS oncogene family	51209	AW269818	Hs.436902
< 1e-07	< 1e-07	0.13	1567458_s_at	RAC1	ras-related C3 botulinum toxin substrate 1 (rho family, small GTP binding protein Rac1)	5879	NM_003733	Hs.118633
< 1e-07	< 1e-07	0.076	213603_s_at	RAC2	ras-related C3 botulinum toxin substrate 2 (rho family, small GTP binding protein Rac2)	5880	NM_000345	Hs.21374	Alpha-synuclein and Parkin-mediated proteolysis in Parkinson disease, Role of Parkin in the Ubiquitin-Proteasomal Pathway, Alzheimer's disease, Parkinson's disease
0.0002765	0.000477	0.13	207419_s_at	RAC2	ras-related C3 botulinum toxin substrate 2 (rho family, small GTP binding protein Rac2)	5880	AI377755	Hs.387679	Allograft rejection, Antigen processing and presentation, Asthma, Autoimmune thyroid disease, Cell adhesion molecules (CAMs), Graft-versus-host disease, Intestinal immune network for IgA production, Leishmaniasis, Phagosome, Rheumatoid arthritis, Staphylococcus aureus infection, Systemic lupus erythematosus, Toxoplasmosis, Type I diabetes mellitus, Viral myocarditis
< 1e-07	< 1e-07	0.1	203749_s_at	RARA	retinoic acid receptor, alpha	5914	AL109935	Hs.636359
< 1e-07	< 1e-07	0.058	205590_at	RASGRP1	RAS guanyl releasing protein 1 (calcium and DAG-regulated)	10125	AI694452	Hs.144130
< 1e-07	< 1e-07	0.075	214369_s_at	RASGRP2	RAS guanyl releasing protein 2 (calcium and DAG-regulated)	10235	AW514168	Hs.144130
< 1e-07	3.48e-07	0.17	208206_s_at	RASGRP2	RAS guanyl releasing protein 2 (calcium and DAG-regulated)	10235	NM_003189	Hs.705618
< 1e-07	< 1e-07	0.038	203185_at	RASSF2	Ras association (RalGDS/AF-6) domain family member 2	9770	U75667	Hs.226007	Amoebiasis, Arginine and proline metabolism, Metabolic pathways
< 1e-07	< 1e-07	0.061	227167_s_at	RASSF3	Ras association (RalGDS/AF-6) domain family member 3	283349	NM_032876	Hs.655832
1.2e-06	3.35e-06	0.18	230466_s_at	RASSF3	Ras association (RalGDS/AF-6) domain family member 3	283349	AI051950	Hs.99472
< 1e-07	< 1e-07	0.069	226436_at	RASSF4	Ras association (RalGDS/AF-6) domain family member 4	83937	U04811	Hs.633653
< 1e-07	< 1e-07	0.036	223322_at	RASSF5	Ras association (RalGDS/AF-6) domain family member 5	83593	BC015940	Hs.153952	Metabolic pathways, Nicotinate and nicotinamide metabolism, Purine metabolism, Pyrimidine metabolism
9e-07	2.6e-06	4.6	212104_s_at	RBFOX2	RNA binding protein, fox-1 homolog (C. elegans) 2	23543	NM_002166	Hs.180919	TGF-beta signaling pathway
< 1e-07	< 1e-07	0.07	222496_s_at	RBM47	RNA binding motif protein 47	54502	BC001247	Hs.525419	SREBP control of lipid synthesis
1.4e-06	3.86e-06	0.22	218035_s_at	RBM47	RNA binding motif protein 47	54502	NM_006823	Hs.433700
1.5e-06	4.09e-06	0.2	209868_s_at	RBMS1	RNA binding motif, single stranded interacting protein 1	5937	AA741307	Hs.65641
2.5e-06	6.43e-06	0.24	207266_x_at	RBMS1	RNA binding motif, single stranded interacting protein 1	5937	X77737	Hs.443948	Collecting duct acid secretion
1e-06	2.86e-06	0.24	203748_x_at	RBMS1	RNA binding motif, single stranded interacting protein 1	5937	NM_004863	Hs.435661	Metabolic pathways, Sphingolipid metabolism
< 1e-07	< 1e-07	0.056	238066_at	RBP7	retinol binding protein 7, cellular	116362	AI937060	Hs.585374
< 1e-07	< 1e-07	0.028	225763_at	RCSD1	RCSD domain containing 1	92241	AI290654	Hs.26403
9e-07	2.6e-06	4.18	217776_at	RDH11	retinol dehydrogenase 11 (all-trans/9-cis/11-cis)	51109	NM_006623	Hs.487296	Glycine, serine and threonine metabolism, Metabolic pathways
2.64e-05	5.44e-05	5.31	1559190_s_at	RDH13	retinol dehydrogenase 13 (all-trans/9-cis)	112724	BC003636	Hs.503284	Attenuation of GPCR Signaling, b-arrestins in GPCR Desensitization, Role of b-arrestins in the activation and targeting of MAP kinases, Roles of b-arrestin-dependent Recruitment of Src Kinases in GPCR Signaling, Chemokine signaling pathway, Endocytosis, MAPK signaling pathway, Phototransduction
< 1e-07	< 1e-07	5.42	244739_at	RDX	radixin	5962	BE218980	Hs.369438	Keratinocyte Differentiation, METS affect on Macrophage Differentiation, Dorso-ventral axis formation, Pathways in cancer, Renal cell carcinoma
5.4e-06	1.29e-05	4.54	204365_s_at	REEP1	receptor accessory protein 1	65055	NM_001206	Hs.150557
0.0003719	0.000626	5.27	204364_s_at	REEP1	receptor accessory protein 1	65055	AA902652	Hs.518774	Metabolic pathways, Purine metabolism
6.6e-06	1.54e-05	0.13	206036_s_at	REL	v-rel avian reticuloendotheliosis viral oncogene homolog	5966	AF064092	Hs.125898	Attenuation of GPCR Signaling, b-arrestins in GPCR Desensitization, CCR3 signaling in Eosinophils, ChREBP regulation by carbohydrates and cAMP, Corticosteroids and cardioprotection, Erk1/Erk2 Mapk Signaling pathway, Ion Channels and Their Functional Role in Vascular Endothelium, Role of b-arrestins in the activation and targeting of MAP kinases, Roles of b-arrestin-dependent Recruitment of Src Ki…
1.92e-05	4.07e-05	0.17	235242_at	REL	v-rel avian reticuloendotheliosis viral oncogene homolog	5966	AW953679	Hs.473117
< 1e-07	< 1e-07	0.22	212646_at	RFTN1	raftlin, lipid raft linker 1	23180	NM_001665	Hs.501728	Bacterial invasion of epithelial cells, Shigellosis
< 1e-07	< 1e-07	6.54	210751_s_at	RGN	regucalcin	9104	NM_006426	Hs.100058
< 1e-07	< 1e-07	0.033	216834_at	RGS1	regulator of G-protein signaling 1	5996	NM_005032	Hs.496622
3e-07	9.59e-07	0.19	202988_s_at	RGS1	regulator of G-protein signaling 1	5996	BF347089	Hs.644633	Inhibition of Matrix Metalloproteinases, p53 Signaling Pathway
< 1e-07	< 1e-07	0.067	204319_s_at	RGS10	regulator of G-protein signaling 10	6001	AU145191	Hs.657046
< 1e-07	< 1e-07	0.01	223809_at	RGS18	regulator of G-protein signaling 18	64407	AI968440	Hs.438709
< 1e-07	< 1e-07	0.073	204336_s_at	RGS19	regulator of G-protein signaling 19	10287	X16323	Hs.396530	Signaling of Hepatocyte Growth Factor Receptor, Cytokine-cytokine receptor interaction, Focal adhesion, Malaria, Melanoma, Pathways in cancer, Renal cell carcinoma
< 1e-07	< 1e-07	0.053	202388_at	RGS2	regulator of G-protein signaling 2	5997	AW089415	Hs.658169	Wnt signaling pathway
0.0001561	0.000281	4.89	204339_s_at	RGS4	regulator of G-protein signaling 4	5999	NM_022350	Hs.482910
9e-07	2.6e-06	10.95	204337_at	RGS4	regulator of G-protein signaling 4	5999	NM_000031	Hs.1227	Hemoglobin Chaperone, Metabolic pathways, Porphyrin and chlorophyll metabolism
8.48e-05	0.000161	4.2	209070_s_at	RGS5	regulator of G-protein signaling 5	8490	NM_002615	Hs.532768
4e-06	9.81e-06	10.51	218353_at	RGS5	regulator of G-protein signaling 5	8490	AL050129	Hs.476636	Tight junction
1.4e-06	3.86e-06	16.28	209071_s_at	RGS5	regulator of G-protein signaling 5	8490	NM_001975	Hs.511915	Glycolysis / Gluconeogenesis, Metabolic pathways, RNA degradation
3.11e-05	6.34e-05	0.17	232053_x_at	RHBDD2	rhomboid domain containing 2	57414	U07236	Hs.470627	Activation of Csk by cAMP-dependent Protein Kinase Inhibits Signaling through the T Cell Receptor, IL 2 signaling pathway, IL-7 Signal Transduction, Lck and Fyn tyrosine kinases in initiation of TCR Activation, T Cell Receptor Signaling Pathway, The Co-Stimulatory Signal During T-cell Activation, Natural killer cell mediated cytotoxicity, Osteoclast differentiation, Primary immunodeficiency, T ce…
2.45e-05	5.09e-05	0.2	222995_s_at	RHBDD2	rhomboid domain containing 2	57414	AI884906	Hs.111164
0.0001426	0.000259	0.17	1555814_a_at	RHOA	ras homolog family member A	387	AA632139	Hs.105323
< 1e-07	< 1e-07	0.059	212099_at	RHOB	ras homolog family member B	388	AL117453	Hs.306343
8.76e-05	0.000166	4.84	216048_s_at	RHOBTB3	Rho-related BTB domain containing 3	22836	AF015043	Hs.516777
1e-07	3.48e-07	7.28	225202_at	RHOBTB3	Rho-related BTB domain containing 3	22836	NM_005331	Hs.247921
< 1e-07	< 1e-07	16.18	202975_s_at	RHOBTB3	Rho-related BTB domain containing 3	22836	AF212232	Hs.713123
6.75e-05	0.00013	0.2	203175_at	RHOG	ras homolog family member G	391	NM_012429	Hs.335614
< 1e-07	< 1e-07	0.13	214449_s_at	RHOQ	ras homolog family member Q	23433	AA976778	Hs.118394
2.54e-05	5.26e-05	0.13	223169_s_at	RHOU	ras homolog family member U	58480	NM_172006	Hs.237392
4.5e-06	1.09e-05	7.23	236620_at	RIF1	replication timing regulatory factor 1	55183	AW243081	Hs.699247
< 1e-07	< 1e-07	0.12	227983_at	RILPL2	Rab interacting lysosomal protein-like 2	196383	NM_001957	Hs.183713	Role of EGF Receptor Transactivation by GPCRs in Cardiac Hypertrophy, Calcium signaling pathway, Neuroactive ligand-receptor interaction, Vascular smooth muscle contraction
< 1e-07	< 1e-07	18.35	229823_at	RIMS2	regulating synaptic membrane exocytosis 2	9699	AI571796	Hs.335614
1.5e-06	4.09e-06	0.16	60471_at	RIN3	Ras and Rab interactor 3	79890	NM_001101	Hs.520640	Chromatin Remodeling by hSWI/SNF ATP-dependent Complexes, Adherens junction, Arrhythmogenic right ventricular cardiomyopathy (ARVC), Bacterial invasion of epithelial cells, Dilated cardiomyopathy, Focal adhesion, Gastric acid secretion, Hypertrophic cardiomyopathy (HCM), Leukocyte transendothelial migration, Pathogenic Escherichia coli infection, Phagosome, Regulation of actin cytoskeleton, Shige…
2.9e-06	7.38e-06	0.24	219457_s_at	RIN3	Ras and Rab interactor 3	79890	NM_016641	Hs.512607
1.2e-06	3.35e-06	0.13	202129_s_at	RIOK3	RIO kinase 3	8780	AA521056	Hs.528305
7.7e-06	1.77e-05	0.19	209545_s_at	RIPK2	receptor-interacting serine-threonine kinase 2	8767	BF589462	Hs.389027
0.0002015	0.000357	6.41	1560042_at	RMDN2	regulator of microtubule dynamics 2	151393	AI183997	Hs.24950
< 1e-07	< 1e-07	14.18	235349_at	RMDN2	regulator of microtubule dynamics 2	151393	AL046017	Hs.356216
< 1e-07	< 1e-07	0.044	206111_at	RNASE2	ribonuclease, RNase A family, 2 (liver, eosinophil-derived neurotoxin)	6036	X68742	Hs.644352	Arrhythmogenic right ventricular cardiomyopathy (ARVC), Dilated cardiomyopathy, ECM-receptor interaction, Focal adhesion, Hematopoietic cell lineage, Hypertrophic cardiomyopathy (HCM), Regulation of actin cytoskeleton
< 1e-07	< 1e-07	0.022	213566_at	RNASE6	ribonuclease, RNase A family, k6	6039	AW020413	Hs.654821
< 1e-07	< 1e-07	0.054	217983_s_at	RNASET2	ribonuclease T2	8635	NM_170776	Hs.383403
< 1e-07	< 1e-07	0.099	217984_at	RNASET2	ribonuclease T2	8635	AI332407	Hs.213424	Wnt signaling pathway
< 1e-07	3.48e-07	8.54	219263_at	RNF128	ring finger protein 128, E3 ubiquitin protein ligase	79589	R34841	Hs.487046	Erythropoietin mediated neuroprotection through NF-kB, The IGF-1 Receptor and Longevity, Huntington's disease, Peroxisome
< 1e-07	< 1e-07	0.24	201780_s_at	RNF13	ring finger protein 13	11342	AK023621	Hs.445030
< 1e-07	< 1e-07	0.1	217865_at	RNF130	ring finger protein 130	55819	AI439752	Hs.167700	ALK in cardiac myocytes, CTCF: First Multivalent Nuclear Factor, TGF-beta signaling pathway
< 1e-07	< 1e-07	0.1	228153_at	RNF144B	ring finger protein 144B	255488	AB037599	Hs.333791	Bone Remodelling, Cytokine-cytokine receptor interaction, Osteoclast differentiation, Rheumatoid arthritis
< 1e-07	< 1e-07	0.047	225414_at	RNF149	ring finger protein 149	284996	NM_016365	Hs.5025
7.63e-05	0.000146	4.79	230720_at	RNF182	ring finger protein 182	221687	X76775	Hs.728759	Allograft rejection, Antigen processing and presentation, Asthma, Autoimmune thyroid disease, Cell adhesion molecules (CAMs), Graft-versus-host disease, Intestinal immune network for IgA production, Leishmaniasis, Phagosome, Rheumatoid arthritis, Staphylococcus aureus infection, Systemic lupus erythematosus, Toxoplasmosis, Type I diabetes mellitus, Viral myocarditis
< 1e-07	< 1e-07	0.16	213038_at	RNF19B	ring finger protein 19B	127544	BE645771	Hs.580300	Alanine, aspartate and glutamate metabolism, Amino sugar and nucleotide sugar metabolism, Metabolic pathways
< 1e-07	< 1e-07	6.63	213194_at	ROBO1	roundabout, axon guidance receptor, homolog 1 (Drosophila)	6091	AI655642	Hs.525093
3e-07	9.59e-07	6.52	231040_at	RORB	RAR-related orphan receptor B	6096	AA143793	Hs.191179	Endocytosis
< 1e-07	< 1e-07	0.2	203379_at	RPS6KA1	ribosomal protein S6 kinase, 90kDa, polypeptide 1	6195	NM_015999	Hs.5298	Adipocytokine signaling pathway
< 1e-07	< 1e-07	4.86	228503_at	RPS6KA6	ribosomal protein S6 kinase, 90kDa, polypeptide 6	27330	NM_013409	Hs.9914	TGF-beta signaling pathway
0.0001185	0.000219	4.3	1554080_at	RQCD1	RCD1 required for cell differentiation1 homolog (S. pombe)	9125	AI927605	Hs.24701
2e-07	6.63e-07	11.98	204802_at	RRAD	Ras-related associated with diabetes	6236	AK097649	Hs.105323
< 1e-07	< 1e-07	25.03	204803_s_at	RRAD	Ras-related associated with diabetes	6236	NM_001549	Hs.47338
< 1e-07	< 1e-07	0.062	242625_at	RSAD2	radical S-adenosyl methionine domain containing 2	91543	AI808958	Hs.18166
< 1e-07	3.48e-07	0.12	213797_at	RSAD2	radical S-adenosyl methionine domain containing 2	91543	NM_015678	Hs.491172
< 1e-07	< 1e-07	9.03	229885_at	RSF1	remodeling and spacing factor 1	51773	AI631159	Hs.419240	Vitamin C in the Brain
< 1e-07	< 1e-07	0.11	203485_at	RTN1	reticulon 1	6252	AL519710	Hs.370510	Cell adhesion molecules (CAMs)
1e-06	2.86e-06	0.22	210222_s_at	RTN1	reticulon 1	6252	BG491844	Hs.696684	Agrin in Postsynaptic Differentiation, Angiotensin II mediated activation of JNK Pathway via Pyk2 dependent signaling, ATM Signaling Pathway, BCR Signaling Pathway, Cadmium induces DNA synthesis and proliferation in macrophages, D4-GDI Signaling Pathway, EGF Signaling Pathway, EPO Signaling Pathway, FAS signaling pathway ( CD95 ), Fc Epsilon Receptor I Signaling in Mast Cells, Hypoxia-Inducible F…
< 1e-07	< 1e-07	15.67	236859_at	RUNX2	runt-related transcription factor 2	860	D86962	Hs.164060
< 1e-07	< 1e-07	23.75	236858_s_at	RUNX2	runt-related transcription factor 2	860	AI701428	Hs.32973	Neuroactive ligand-receptor interaction
< 1e-07	< 1e-07	0.037	204198_s_at	RUNX3	runt-related transcription factor 3	864	BC011595	Hs.190495
< 1e-07	< 1e-07	0.12	204197_s_at	RUNX3	runt-related transcription factor 3	864	AU155376	Hs.403933
7.92e-05	0.000151	5.32	222614_at	RWDD2B	RWD domain containing 2B	10069	AW971248	Hs.476636	Tight junction
< 1e-07	< 1e-07	0.15	202426_s_at	RXRA	retinoid X receptor, alpha	6256	AW300405	Hs.59159
1e-07	3.48e-07	19	206306_at	RYR3	ryanodine receptor 3	6263	BC020916	Hs.482291
4e-07	1.25e-06	0.098	238909_at	S100A10	S100 calcium binding protein A10	6281	J05594	Hs.596913
0.0002544	0.000443	0.18	200660_at	S100A11	S100 calcium binding protein A11	6282	NM_016594	Hs.655103
< 1e-07	< 1e-07	0.0058	205863_at	S100A12	S100 calcium binding protein A12	6283	BE974098	Hs.368433
8e-07	2.34e-06	6.4	204268_at	S100A2	S100 calcium binding protein A2	6273	NM_002030	Hs.445466	Neuroactive ligand-receptor interaction, Staphylococcus aureus infection
< 1e-07	< 1e-07	0.021	203186_s_at	S100A4	S100 calcium binding protein A4	6275	AI634580	Hs.655519
< 1e-07	< 1e-07	0.0062	203535_at	S100A9	S100 calcium binding protein A9	6280	AI633888	Hs.370503
< 1e-07	3.48e-07	0.025	204351_at	S100P	S100 calcium binding protein P	6286	AI805297	Hs.24135
2.3e-06	5.97e-06	0.21	236782_at	SAMD3	sterile alpha motif domain containing 3	154075	BE222274	Hs.472838	MAPK signaling pathway, Non-small cell lung cancer, Pathways in cancer
< 1e-07	< 1e-07	0.12	219691_at	SAMD9	sterile alpha motif domain containing 9	54809	AW004016	Hs.98265	Metabolic pathways, N-Glycan biosynthesis, Other types of O-glycan biosynthesis
9.9e-06	2.2e-05	0.24	230036_at	SAMD9L	sterile alpha motif domain containing 9-like	219285	BC005147	Hs.471933
< 1e-07	< 1e-07	0.074	234987_at	SAMHD1	SAM domain and HD domain 1	25939	AW000954	Hs.444349
< 1e-07	< 1e-07	0.093	204502_at	SAMHD1	SAM domain and HD domain 1	25939	NM_000860	Hs.596913
< 1e-07	< 1e-07	0.16	235529_x_at	SAMHD1	SAM domain and HD domain 1	25939	NM_004930	Hs.432760
1.2e-06	3.35e-06	0.16	1559883_s_at	SAMHD1	SAM domain and HD domain 1	25939	AV700174	Hs.292580
< 1e-07	< 1e-07	0.2	235964_x_at	SAMHD1	SAM domain and HD domain 1	25939	BG249246	Hs.643051
< 1e-07	< 1e-07	0.01	220330_s_at	SAMSN1	SAM domain, SH3 domain and nuclear localization signals 1	64092	BG620958	Hs.643599
< 1e-07	3.48e-07	0.07	1555638_a_at	SAMSN1	SAM domain, SH3 domain and nuclear localization signals 1	64092	NM_001738	Hs.23118	Nitrogen metabolism
< 1e-07	< 1e-07	5.53	209127_s_at	SART3	squamous cell carcinoma antigen recognized by T cells 3	9733	AW131801	Hs.519601	TGF-beta signaling pathway
< 1e-07	< 1e-07	0.067	204923_at	SASH3	SAM and SH3 domain containing 3	54440	NM_152787	Hs.188256	NOD-like receptor signaling pathway
< 1e-07	< 1e-07	0.15	213988_s_at	SAT1	spermidine/spermine N1-acetyltransferase 1	6303	AA758751	Hs.533644
< 1e-07	< 1e-07	0.14	203408_s_at	SATB1	SATB homeobox 1	6304	BC007102	Hs.148767	RNA degradation
< 1e-07	< 1e-07	11.59	212417_at	SCAMP1	secretory carrier membrane protein 1	9522	AL574186	Hs.557655
0.0001948	0.000346	4.56	232421_at	SCARB1	scavenger receptor class B, member 1	949	BG619261	Hs.644352	Arrhythmogenic right ventricular cardiomyopathy (ARVC), Dilated cardiomyopathy, ECM-receptor interaction, Focal adhesion, Hematopoietic cell lineage, Hypertrophic cardiomyopathy (HCM), Regulation of actin cytoskeleton
< 1e-07	< 1e-07	4.52	224901_at	SCD5	stearoyl-CoA desaturase 5	79966	NM_014333	Hs.370510	Cell adhesion molecules (CAMs)
< 1e-07	< 1e-07	8.11	204035_at	SCG2	secretogranin II	7857	NM_006254	Hs.155342	HIV-I Nef: negative effector of Fas and TNF, Keratinocyte Differentiation, Chemokine signaling pathway, Fc epsilon RI signaling pathway, Fc gamma R-mediated phagocytosis, GnRH signaling pathway, Neurotrophin signaling pathway, Tight junction, Type II diabetes mellitus, Vascular smooth muscle contraction
3e-07	9.59e-07	9.08	229199_at	SCN9A	sodium channel, voltage gated, type IX alpha subunit	6335	AA642341	Hs.509008
< 1e-07	< 1e-07	16.45	206950_at	SCN9A	sodium channel, voltage gated, type IX alpha subunit	6335	U16153	Hs.519601	TGF-beta signaling pathway
1.78e-05	3.79e-05	0.15	205241_at	SCO2	SCO2 cytochrome c oxidase assembly protein	9997	L36674	Hs.21374	Alpha-synuclein and Parkin-mediated proteolysis in Parkinson disease, Role of Parkin in the Ubiquitin-Proteasomal Pathway, Alzheimer's disease, Parkinson's disease
< 1e-07	< 1e-07	0.045	222717_at	SDPR	serum deprivation response	8436	BE564430	Hs.161377	Peroxisome
8.22e-05	0.000157	0.24	240024_at	SEC14L2	SEC14-like 2 (S. cerevisiae)	23541	BG163591	Hs.327631
4.36e-05	8.69e-05	4.16	212900_at	SEC24A	SEC24 family member A	10802	AF062347	Hs.406096
3e-07	9.59e-07	4.56	201914_s_at	SEC63	SEC63 homolog (S. cerevisiae)	11231	AA262583	Hs.471779
< 1e-07	< 1e-07	0.15	213716_s_at	SECTM1	secreted and transmembrane 1	6398	AA173588	Hs.420229
0.0002534	0.000442	0.15	214433_s_at	SELENBP1	selenium binding protein 1	8991	AB014550	Hs.8118
< 1e-07	< 1e-07	0.006	204563_at	SELL	selectin L	6402	AB040875	Hs.390594
< 1e-07	< 1e-07	0.09	209879_at	SELPLG	selectin P ligand	6404	AW029619	Hs.74368	Protein processing in endoplasmic reticulum
1.99e-05	4.2e-05	0.23	217811_at	SELT	selenoprotein T	51714	BF685808	Hs.120633	p53 signaling pathway
< 1e-07	< 1e-07	0.2	219259_at	SEMA4A	sema domain, immunoglobulin domain (Ig), transmembrane domain (TM) and short cytoplasmic domain, (semaphorin) 4A	64218	AI302100	Hs.93675
< 1e-07	< 1e-07	0.068	203528_at	SEMA4D	sema domain, immunoglobulin domain (Ig), transmembrane domain (TM) and short cytoplasmic domain, (semaphorin) 4D	10507	U87967	Hs.576612	Purine metabolism, Pyrimidine metabolism
7e-07	2.07e-06	5.47	220574_at	SEMA6D	sema domain, transmembrane domain (TM), and cytoplasmic domain, (semaphorin) 6D	80031	AA428286	Hs.331268
< 1e-07	3.48e-07	7.57	226492_at	SEMA6D	sema domain, transmembrane domain (TM), and cytoplasmic domain, (semaphorin) 6D	80031	NM_006289	Hs.471014	Apoptotic Signaling in Response to DNA Damage, Erk and PI-3 Kinase Are Necessary for Collagen Binding in Corneal Epithelia, Integrin Signaling Pathway, mCalpain and friends in Cell motility, Rho cell motility signaling pathway, uCalpain and friends in Cell spread, Focal adhesion
< 1e-07	< 1e-07	8.3	233882_s_at	SEMA6D	sema domain, transmembrane domain (TM), and cytoplasmic domain, (semaphorin) 6D	80031	NM_000717	Hs.89485	Nitrogen metabolism, Proximal tubule bicarbonate reclamation
< 1e-07	< 1e-07	0.19	212415_at	SEPT6	septin 6	23157	AF498970	Hs.247077	CCR3 signaling in Eosinophils, Erk and PI-3 Kinase Are Necessary for Collagen Binding in Corneal Epithelia, Influence of Ras and Rho proteins on G1 to S Transition, Integrin Signaling Pathway, Phospholipids as signalling intermediaries, Protein Kinase A at the Centrosome, Ras Signaling Pathway, Rho cell motility signaling pathway, Rho-Selective Guanine Exchange Factor AKAP13 Mediates Stress Fiber…
0.0002002	0.000355	0.21	1565823_at	SEPT7	septin 7	989	AI620677	Hs.710156	ErbB signaling pathway
2.8e-06	7.15e-06	4.03	212812_at	SERINC5	serine incorporator 5	256987	U26455	Hs.367437	Apoptotic Signaling in Response to DNA Damage, ATM Signaling Pathway, cdc25 and chk1 Regulatory Pathway in response to DNA damage, Cell Cycle: G1/S Check Point , Cell Cycle: G2/M Checkpoint, Hypoxia and p53 in the Cardiovascular system, p53 Signaling Pathway, RB Tumor Suppressor/Checkpoint Signaling in response to DNA damage, Regulation of cell cycle progression by Plk3, Role of BRCA1, BRCA2 and …
< 1e-07	< 1e-07	0.0043	202833_s_at	SERPINA1	serpin peptidase inhibitor, clade A (alpha-1 antiproteinase, antitrypsin), member 1	5265	AW993257	Hs.656394
< 1e-07	< 1e-07	0.0081	211429_s_at	SERPINA1	serpin peptidase inhibitor, clade A (alpha-1 antiproteinase, antitrypsin), member 1	5265	AI129949	Hs.368307	Synaptic Proteins at the Synaptic Junction, Cell adhesion molecules (CAMs)
0.0005482	0.000894	4.38	209443_at	SERPINA5	serpin peptidase inhibitor, clade A (alpha-1 antiproteinase, antitrypsin), member 5	5104	BF591534	Hs.21861
< 1e-07	< 1e-07	0.15	242814_at	SERPINB9	serpin peptidase inhibitor, clade B (ovalbumin), member 9	5272	AI692645	Hs.195403
7.43e-05	0.000143	4.62	202283_at	SERPINF1	serpin peptidase inhibitor, clade F (alpha-2 antiplasmin, pigment epithelium derived factor), member 1	5176	AI356398	Hs.503093
6e-07	1.81e-06	5.47	205352_at	SERPINI1	serpin peptidase inhibitor, clade I (neuroserpin), member 1	5274	AU118419	Hs.187772	Chemokine signaling pathway
7.9e-06	1.8e-05	0.067	235683_at	SESN3	sestrin 3	143686	U15555	Hs.435661	Metabolic pathways, Sphingolipid metabolism
0.000135	0.000246	0.19	235684_s_at	SESN3	sestrin 3	143686	AA004210	Hs.656865
< 1e-07	< 1e-07	0.24	201357_s_at	SF3A1	splicing factor 3a, subunit 1, 120kDa	10291	AU159022	Hs.19156	Wnt signaling pathway
< 1e-07	< 1e-07	0.2	227210_at	SFMBT2	Scm-like with four mbt domains 2	57713	NM_003622	Hs.172445
8.68e-05	0.000164	7.35	202035_s_at	SFRP1	secreted frizzled-related protein 1	6422	BC000686	Hs.563491
< 1e-07	< 1e-07	23.67	202036_s_at	SFRP1	secreted frizzled-related protein 1	6422	AI435248	Hs.469970	Spliceosome
< 1e-07	< 1e-07	51.87	202037_s_at	SFRP1	secreted frizzled-related protein 1	6422	AF339793	Hs.288809
7.19e-05	0.000138	10.68	204051_s_at	SFRP4	secreted frizzled-related protein 4	6424	BC000737	Hs.386726
2e-07	6.63e-07	18.63	204052_s_at	SFRP4	secreted frizzled-related protein 4	6424	AW574933	Hs.182014	Regulation of actin cytoskeleton
9.6e-06	2.14e-05	0.25	221268_s_at	SGPP1	sphingosine-1-phosphate phosphatase 1	81537	NM_001803	Hs.276770
1.06e-05	2.34e-05	0.18	221269_s_at	SH3BGRL3	SH3 domain binding glutamate-rich protein like 3	83442	BF222940	Hs.25845
7.88e-05	0.000151	4.12	222258_s_at	SH3BP4	SH3-domain binding protein 4	23677	T15545	Hs.371218	Eph Kinases and ephrins support platelet aggregation, Axon guidance
8.5e-06	1.93e-05	4.1	225589_at	SH3RF1	SH3 domain containing ring finger 1	57630	BC035792	Hs.656318
0.0006746	0.00109	0.16	219256_s_at	SH3TC1	SH3 domain and tetratricopeptide repeats 1	54436	AL834350	Hs.368264	mRNA surveillance pathway, Oocyte meiosis, Wnt signaling pathway
9.2e-06	2.07e-05	4.72	1557458_s_at	SHB	Src homology 2 domain containing adaptor protein B	6461	NM_024563	Hs.13528
4e-07	1.25e-06	0.065	219519_s_at	SIGLEC1	sialic acid binding Ig-like lectin 1, sialoadhesin	6614	AF225417	Hs.24135
2.1e-05	4.41e-05	0.19	44673_at	SIGLEC1	sialic acid binding Ig-like lectin 1, sialoadhesin	6614	NM_000855	Hs.24321	Ion Channels and Their Functional Role in Vascular Endothelium, Gap junction, Long-term depression, Purine metabolism, Salivary secretion, Vascular smooth muscle contraction
< 1e-07	< 1e-07	0.04	1552807_a_at	SIGLEC10	sialic acid binding Ig-like lectin 10	89790	NM_018490	Hs.502176
< 1e-07	< 1e-07	11.13	1552910_at	SIGLEC11	sialic acid binding Ig-like lectin 11	114132	AK022142	Hs.80720	Signaling of Hepatocyte Growth Factor Receptor, Bacterial invasion of epithelial cells, ErbB signaling pathway, Neurotrophin signaling pathway, Renal cell carcinoma
< 1e-07	< 1e-07	0.13	220000_at	SIGLEC5	sialic acid binding Ig-like lectin 5	8778	AA100793	Hs.207631	Adherens junction
< 1e-07	< 1e-07	0.11	207224_s_at	SIGLEC7	sialic acid binding Ig-like lectin 7	27036	AA831769	Hs.656778	Natural killer cell mediated cytotoxicity
0.0001909	0.00034	4.72	228026_at	SIKE1	suppressor of IKBKE 1	80143	BF000296	Hs.507348	Glycosaminoglycan biosynthesis - heparan sulfate
< 1e-07	3.48e-07	5.94	221705_s_at	SIKE1	suppressor of IKBKE 1	80143	AI983535	Hs.709277	RIG-I-like receptor signaling pathway
4e-07	1.25e-06	0.19	202897_at	SIRPA	signal-regulatory protein alpha	140885	X68285	Hs.1466	Glycerolipid metabolism, Metabolic pathways, PPAR signaling pathway
< 1e-07	< 1e-07	0.065	216899_s_at	SKAP2	src kinase associated phosphoprotein 2	8935	AL554245	Hs.347991
< 1e-07	< 1e-07	0.073	204362_at	SKAP2	src kinase associated phosphoprotein 2	8935	AI337304	Hs.191539
< 1e-07	< 1e-07	0.086	204361_s_at	SKAP2	src kinase associated phosphoprotein 2	8935	NM_004329	Hs.524477	ALK in cardiac myocytes, Cytokine-cytokine receptor interaction, TGF-beta signaling pathway
1.8e-06	4.8e-06	0.2	225639_at	SKAP2	src kinase associated phosphoprotein 2	8935	AI625550	Hs.195464	Focal adhesion, MAPK signaling pathway
1.5e-05	3.25e-05	0.11	217591_at	SKIL	SKI-like proto-oncogene	6498	AV703311	Hs.731377	Bile secretion, Fat digestion and absorption, Hepatitis C, Phagosome, Vitamin digestion and absorption
< 1e-07	< 1e-07	0.02	203761_at	SLA	Src-like-adaptor	6503	AF317711	Hs.744880
1e-07	3.48e-07	0.12	203760_s_at	SLA	Src-like-adaptor	6503	NM_002053	Hs.62661
< 1e-07	< 1e-07	0.18	219386_s_at	SLAMF8	SLAM family member 8	56833	BF855173	Hs.191346
< 1e-07	< 1e-07	0.046	210423_s_at	SLC11A1	solute carrier family 11 (proton-coupled divalent metal ion transporter), member 1	6556	AA649070	Hs.618463
< 1e-07	< 1e-07	0.21	210422_x_at	SLC11A1	solute carrier family 11 (proton-coupled divalent metal ion transporter), member 1	6556	AK095462	Hs.591566
< 1e-07	3.48e-07	0.25	217473_x_at	SLC11A1	solute carrier family 11 (proton-coupled divalent metal ion transporter), member 1	6556	AK000345	Hs.272499
1e-06	2.86e-06	0.2	223596_at	SLC12A6	solute carrier family 12 (potassium/chloride transporter), member 6	9990	D00682	Hs.170622	Axon guidance, Fc gamma R-mediated phagocytosis, Regulation of actin cytoskeleton
< 1e-07	< 1e-07	0.19	219593_at	SLC15A3	solute carrier family 15 (oligopeptide transporter), member 3	51296	BF304695	Hs.461896	CXCR4 Signaling Pathway, Signaling of Hepatocyte Growth Factor Receptor, Bacterial invasion of epithelial cells, Chemokine signaling pathway, Chronic myeloid leukemia, ErbB signaling pathway, Fc gamma R-mediated phagocytosis, Focal adhesion, Insulin signaling pathway, MAPK signaling pathway, Neurotrophin signaling pathway, Pathways in cancer, Regulation of actin cytoskeleton, Renal cell carcinoma…
5.8e-06	1.37e-05	4.07	202235_at	SLC16A1	solute carrier family 16 (monocarboxylate transporter), member 1	6566	BF696840	Hs.89643	Metabolic pathways, Pentose phosphate pathway
2.27e-05	4.74e-05	6.48	202234_s_at	SLC16A1	solute carrier family 16 (monocarboxylate transporter), member 1	6566	AL545760	Hs.129683	Neuroregulin receptor degredation protein-1 Controls ErbB3 receptor recycling, Protein processing in endoplasmic reticulum, Ubiquitin mediated proteolysis
0.0006599	0.00107	0.22	230748_at	SLC16A6	solute carrier family 16, member 6	9120	AL049699	Hs.21160	Mechanism of Gene Regulation by Peroxisome Proliferators via PPARa(alpha), Shuttle for transfer of acetyl groups from mitochondria to the cytosol, Metabolic pathways, PPAR signaling pathway, Pyruvate metabolism
4.13e-05	8.27e-05	4.34	213664_at	SLC1A1	solute carrier family 1 (neuronal/epithelial high affinity glutamate transporter, system Xag), member 1	6505	AK000270	Hs.651221	Protein Kinase A at the Centrosome
4.8e-06	1.16e-05	4.49	202800_at	SLC1A3	solute carrier family 1 (glial high affinity glutamate transporter), member 3	6507	AI654224	Hs.42572	One carbon pool by folate
7.1e-06	1.65e-05	4.56	212810_s_at	SLC1A4	solute carrier family 1 (glutamate/neutral amino acid transporter), member 4	6509	AL040051	Hs.434914
4e-07	1.25e-06	0.23	228497_at	SLC22A15	solute carrier family 22, member 15	55356	AF070558	Hs.12333
< 1e-07	< 1e-07	0.11	205896_at	SLC22A4	solute carrier family 22 (organic cation/zwitterion transporter), member 4	6583	NM_003155	Hs.25590
7e-07	2.07e-06	4.84	201918_at	SLC25A36	solute carrier family 25 (pyrimidine nucleotide carrier), member 36	55186	NM_001855	Hs.409034	Protein digestion and absorption
5.56e-05	0.000109	4.93	237741_at	SLC25A36	solute carrier family 25 (pyrimidine nucleotide carrier), member 36	55186	NM_014393	Hs.561815
< 1e-07	< 1e-07	0.03	231078_at	SLC25A37	solute carrier family 25 (mitochondrial iron transporter), member 37	51312	AF116610	Hs.471381	Integrin Signaling Pathway
< 1e-07	< 1e-07	0.033	222528_s_at	SLC25A37	solute carrier family 25 (mitochondrial iron transporter), member 37	51312	NM_021083	Hs.78919
8e-07	2.34e-06	0.098	221920_s_at	SLC25A37	solute carrier family 25 (mitochondrial iron transporter), member 37	51312	J03580	Hs.591159
< 1e-07	< 1e-07	0.14	218136_s_at	SLC25A37	solute carrier family 25 (mitochondrial iron transporter), member 37	51312	NM_012334	Hs.481720	Fc gamma R-mediated phagocytosis
< 1e-07	< 1e-07	0.14	226179_at	SLC25A37	solute carrier family 25 (mitochondrial iron transporter), member 37	51312	AW069285	Hs.526728
9.2e-06	2.07e-05	0.14	222529_at	SLC25A37	solute carrier family 25 (mitochondrial iron transporter), member 37	51312	U47924	Hs.631659	Activation of Csk by cAMP-dependent Protein Kinase Inhibits Signaling through the T Cell Receptor, Antigen Dependent B Cell Activation, Bystander B Cell Activation, Cytokines and Inflammatory Response, HIV Induced T Cell Apoptosis, HIV-1 defeats host-mediated resistance by CEM15, IL 17 Signaling Pathway, IL 5 Signaling Pathway, Lck and Fyn tyrosine kinases in initiation of TCR Activation, NO2-dep…
1.2e-06	3.35e-06	0.14	228527_s_at	SLC25A37	solute carrier family 25 (mitochondrial iron transporter), member 37	51312	R05895	Hs.469970	Spliceosome
< 1e-07	3.48e-07	0.15	242335_at	SLC25A37	solute carrier family 25 (mitochondrial iron transporter), member 37	51312	NM_018475	Hs.479766
0.0001953	0.000346	0.19	223649_s_at	SLC25A39	solute carrier family 25, member 39	51629	BE878495	Hs.654387
< 1e-07	< 1e-07	7.85	220475_at	SLC28A3	solute carrier family 28 (concentrative nucleoside transporter), member 3	64078	D50918	Hs.496666
< 1e-07	< 1e-07	20.63	232277_at	SLC28A3	solute carrier family 28 (concentrative nucleoside transporter), member 3	64078	AK002203	Hs.189780
2.13e-05	4.47e-05	0.18	202499_s_at	SLC2A3	solute carrier family 2 (facilitated glucose transporter), member 3	6515	NM_005368	Hs.517586
< 1e-07	< 1e-07	0.22	219869_s_at	SLC39A8	solute carrier family 39 (zinc transporter), member 8	64116	AK023014	Hs.592313	D4-GDI Signaling Pathway, Erk and PI-3 Kinase Are Necessary for Collagen Binding in Corneal Epithelia, PKC-catalyzed phosphorylation of inhibitory phosphoprotein of myosin phosphatase, Rho cell motility signaling pathway, Focal adhesion, Leukocyte transendothelial migration
< 1e-07	< 1e-07	0.25	209267_s_at	SLC39A8	solute carrier family 39 (zinc transporter), member 8	64116	NM_000909	Hs.519057	Neuroactive ligand-receptor interaction
< 1e-07	< 1e-07	12.97	228221_at	SLC44A3	solute carrier family 44, member 3	126969	AI744280	Hs.659013
1.79e-05	3.81e-05	9.65	235763_at	SLC44A5	solute carrier family 44, member 5	204962	NM_003944	Hs.632460
5.99e-05	0.000116	0.18	205592_at	SLC4A1	solute carrier family 4 (anion exchanger), member 1 (Diego blood group)	6521	NM_001550	Hs.7879
< 1e-07	< 1e-07	0.24	205920_at	SLC6A6	solute carrier family 6 (neurotransmitter transporter), member 6	6533	AA815089	Hs.591185
0.0001342	0.000245	6.6	209921_at	SLC7A11	solute carrier family 7 (anionic amino acid transporter light chain, xc- system), member 11	23657	NM_005620	Hs.417004
< 1e-07	< 1e-07	0.079	204588_s_at	SLC7A7	solute carrier family 7 (amino acid transporter light chain, y+L system), member 7	9056	AV699744	Hs.8118
< 1e-07	< 1e-07	0.16	235518_at	SLC8A1	solute carrier family 8 (sodium/calcium exchanger), member 1	6546	AI478523	Hs.167700	ALK in cardiac myocytes, CTCF: First Multivalent Nuclear Factor, TGF-beta signaling pathway
< 1e-07	< 1e-07	0.22	203473_at	SLCO2B1	solute carrier organic anion transporter family, member 2B1	11309	AI651594	Hs.414332	Hepatitis C
< 1e-07	< 1e-07	0.17	226743_at	SLFN11	schlafen family member 11	91607	NM_004226	Hs.88297
3.4e-06	8.49e-06	5.26	230680_at	SLITRK4	SLIT and NTRK-like family, member 4	139065	AI188445	Hs.512833
0.0001517	0.000274	4.11	229835_s_at	SLMO2	slowmo homolog 2 (Drosophila)	51012	BC015963	Hs.446123
1.24e-05	2.72e-05	4.65	227798_at	SMAD1	SMAD family member 1	4086	AW167298	Hs.659013
1e-06	2.86e-06	4.87	225219_at	SMAD5	SMAD family member 5	4090	T63512	Hs.484738
0.0009466	0.00149	6.01	227719_at	SMAD9	SMAD family member 9	4093	AI186739	Hs.644095
< 1e-07	< 1e-07	0.12	225282_at	SMAP2	small ArfGAP2	64744	AI373676	Hs.24485	Cell cycle, Oocyte meiosis
< 1e-07	< 1e-07	0.083	215294_s_at	SMARCA1	SWI/SNF related, matrix associated, actin dependent regulator of chromatin, subfamily a, member 1	6594	BF691523	Hs.292580
0.0002703	0.000467	4.64	209258_s_at	SMC3	structural maintenance of chromosomes 3	9126	AF111804	Hs.397705
< 1e-07	< 1e-07	0.14	218781_at	SMC6	structural maintenance of chromosomes 6	79677	AI376433	Hs.117136
< 1e-07	< 1e-07	0.13	212577_at	SMCHD1	structural maintenance of chromosomes flexible hinge domain containing 1	23347	NM_013238	Hs.438830
0.000134	0.000245	0.24	212579_at	SMCHD1	structural maintenance of chromosomes flexible hinge domain containing 1	23347	N32051	Hs.335239
< 1e-07	< 1e-07	5.84	218788_s_at	SMYD3	SET and MYND domain containing 3	64754	NM_006145	Hs.515210	Hypoxia and p53 in the Cardiovascular system, Prion Pathway, Protein processing in endoplasmic reticulum
5.43e-05	0.000106	0.12	204467_s_at	SNCA	synuclein, alpha (non A4 component of amyloid precursor)	6622	NM_002872	Hs.517601	Adherens junction, Axon guidance, B cell receptor signaling pathway, Chemokine signaling pathway, Colorectal cancer, Fc epsilon RI signaling pathway, Fc gamma R-mediated phagocytosis, Focal adhesion, Leukocyte transendothelial migration, MAPK signaling pathway, Natural killer cell mediated cytotoxicity, Pancreatic cancer, Pathways in cancer, Regulation of actin cytoskeleton, VEGF signaling pathwa…
0.0003092	0.000528	0.17	204466_s_at	SNCA	synuclein, alpha (non A4 component of amyloid precursor)	6622	AW450910	Hs.371720	Aspirin Blocks Signaling Pathway Involved in Platelet Activation, BCR Signaling Pathway, Fc Epsilon Receptor I Signaling in Mast Cells, IL 2 signaling pathway, IL-2 Receptor Beta Chain in T cell Activation, Ras-Independent pathway in NK cell-mediated cytotoxicity, B cell receptor signaling pathway, Fc epsilon RI signaling pathway, Fc gamma R-mediated phagocytosis, Natural killer cell mediated cyt…
< 1e-07	< 1e-07	0.15	218032_at	SNN	stannin	8303	NM_016441	Hs.699247
1.9e-06	5.04e-06	0.22	235536_at	SNORD89	small nucleolar RNA, C/D box 89	692205	AK095236	Hs.24701
< 1e-07	< 1e-07	0.2	207474_at	SNRK	SNF related kinase	54861	NM_005096	Hs.522684
< 1e-07	< 1e-07	0.22	209481_at	SNRK	SNF related kinase	54861	AI439556	Hs.533977
1e-07	3.48e-07	0.15	218404_at	SNX10	sorting nexin 10	29887	L34703	Hs.74647
2e-07	6.63e-07	0.057	227697_at	SOCS3	suppressor of cytokine signaling 3	9021	X00452	Hs.387679	Allograft rejection, Antigen processing and presentation, Asthma, Autoimmune thyroid disease, Cell adhesion molecules (CAMs), Graft-versus-host disease, Intestinal immune network for IgA production, Leishmaniasis, Phagosome, Rheumatoid arthritis, Staphylococcus aureus infection, Systemic lupus erythematosus, Toxoplasmosis, Type I diabetes mellitus, Viral myocarditis
0.0003433	0.000581	0.24	206359_at	SOCS3	suppressor of cytokine signaling 3	9021	T99553	Hs.147381
8.71e-05	0.000165	0.21	1566342_at	SOD2	superoxide dismutase 2, mitochondrial	6648	AW291369	Hs.268874
< 1e-07	< 1e-07	0.017	212560_at	SORL1	sortilin-related receptor, L(DLR class) A repeats containing	6653	NM_004950	Hs.435680	Small Leucine-rich Proteoglycan (SLRP) molecules
< 1e-07	< 1e-07	0.034	203509_at	SORL1	sortilin-related receptor, L(DLR class) A repeats containing	6653	AF054818	Hs.398093
< 1e-07	< 1e-07	0.18	230707_at	SORL1	sortilin-related receptor, L(DLR class) A repeats containing	6653	BG292389	Hs.482910
< 1e-07	< 1e-07	0.11	209762_x_at	SP110	SP110 nuclear body protein	3431	NM_000051	Hs.367437	Apoptotic Signaling in Response to DNA Damage, ATM Signaling Pathway, cdc25 and chk1 Regulatory Pathway in response to DNA damage, Cell Cycle: G1/S Check Point , Cell Cycle: G2/M Checkpoint, Hypoxia and p53 in the Cardiovascular system, p53 Signaling Pathway, RB Tumor Suppressor/Checkpoint Signaling in response to DNA damage, Regulation of cell cycle progression by Plk3, Role of BRCA1, BRCA2 and …
< 1e-07	< 1e-07	0.11	208392_x_at	SP110	SP110 nuclear body protein	3431	M92934	Hs.410037
3.82e-05	7.69e-05	0.11	209761_s_at	SP110	SP110 nuclear body protein	3431	BG260394	Hs.21374	Alpha-synuclein and Parkin-mediated proteolysis in Parkinson disease, Role of Parkin in the Ubiquitin-Proteasomal Pathway, Alzheimer's disease, Parkinson's disease
< 1e-07	< 1e-07	0.15	223980_s_at	SP110	SP110 nuclear body protein	3431	NM_001392	Hs.643454
< 1e-07	< 1e-07	0.15	208012_x_at	SP110	SP110 nuclear body protein	3431	AI632223	Hs.268874
1.5e-06	4.09e-06	6.15	212468_at	SPAG9	sperm associated antigen 9	9043	D32039	Hs.643801	Cell adhesion molecules (CAMs)
1.4e-06	3.86e-06	4.18	212667_at	SPARC	secreted protein, acidic, cysteine-rich (osteonectin)	6678	AW014593	Hs.62661
< 1e-07	< 1e-07	0.066	1556601_a_at	SPATA13	spermatogenesis associated 13	221178	NM_006393	Hs.5025
2.1e-06	5.49e-06	4.36	222593_s_at	SPATS2	spermatogenesis associated, serine-rich 2	65244	NM_000101	Hs.513803	Leishmaniasis, Leukocyte transendothelial migration, Osteoclast differentiation, Phagosome
< 1e-07	< 1e-07	4.84	218324_s_at	SPATS2	spermatogenesis associated, serine-rich 2	65244	N35896	Hs.172445
< 1e-07	< 1e-07	0.086	228325_at	SPIDR	scaffolding protein involved in DNA repair	23514	R94644	Hs.643801	Cell adhesion molecules (CAMs)
< 1e-07	< 1e-07	0.015	209875_s_at	SPP1	secreted phosphoprotein 1	6696	NM_001731	Hs.255935	BTG family proteins and cell cycle regulation, RNA degradation
1.71e-05	3.65e-05	0.24	204011_at	SPRY2	sprouty homolog 2 (Drosophila)	10253	AL524035	Hs.732435	Activation of Src by Protein-tyrosine phosphatase alpha, AKAP95 role in mitosis and chromosome dynamics, cdc25 and chk1 Regulatory Pathway in response to DNA damage, Cell Cycle: G1/S Check Point , Cell Cycle: G2/M Checkpoint, Cyclins and Cell Cycle Regulation, Estrogen-responsive protein Efp controls cell cycle and breast tumors growth, How Progesterone Initiates the Oocyte Maturation, Protein Ki…
< 1e-07	< 1e-07	0.24	225095_at	SPTLC2	serine palmitoyltransferase, long chain base subunit 2	9517	BF244402	Hs.403933
0.0001516	0.000274	0.25	216202_s_at	SPTLC2	serine palmitoyltransferase, long chain base subunit 2	9517	NM_006290	Hs.211600	CD40L Signaling Pathway, NF-kB Signaling Pathway, TNFR2 Signaling Pathway, NOD-like receptor signaling pathway
< 1e-07	< 1e-07	0.072	217995_at	SQRDL	sulfide quinone reductase-like (yeast)	58472	AFFX-HUMISGF3A/M97935_MA	Hs.642990	Apoptotic Signaling in Response to DNA Damage, Bioactive Peptide Induced Signaling Pathway, EGF Signaling Pathway, IFN alpha signaling pathway, IFN gamma signaling pathway , IL-10 Anti-inflammatory Signaling Pathway, IL22 Soluble Receptor Signaling Pathway , Inhibition of Cellular Proliferation by Gleevec, MAPKinase Signaling Pathway, p38 MAPK Signaling Pathway , PDGF Signaling Pathway, TPO Signa…
< 1e-07	< 1e-07	0.043	1554676_at	SRGN	serglycin	5552	NM_005239	Hs.644231	Keratinocyte Differentiation, METS affect on Macrophage Differentiation, Dorso-ventral axis formation
4.9e-06	1.18e-05	0.052	201858_s_at	SRGN	serglycin	5552	NM_002094	Hs.528780	mRNA surveillance pathway
2.14e-05	4.49e-05	0.2	201859_at	SRGN	serglycin	5552	AV646610	Hs.519601	TGF-beta signaling pathway
< 1e-07	< 1e-07	5.13	203605_at	SRP54	signal recognition particle 54kDa	6729	BG035761	Hs.527973	IL-2 Receptor Beta Chain in T cell Activation, IL22 Soluble Receptor Signaling Pathway , Adipocytokine signaling pathway, Hepatitis C, Insulin signaling pathway, Jak-STAT signaling pathway, Osteoclast differentiation, Type II diabetes mellitus, Ubiquitin mediated proteolysis
1.13e-05	2.49e-05	0.24	239512_at	SRSF4	serine/arginine-rich splicing factor 4	6429	NM_016657	Hs.745072	Vibrio cholerae infection
< 1e-07	< 1e-07	0.25	229744_at	SSFA2	sperm specific antigen 2	6744	AA573805	Hs.124366
< 1e-07	< 1e-07	0.12	226080_at	SSH2	slingshot protein phosphatase 2	85464	M28590	Hs.436568	Antigen Processing and Presentation, Antigen processing and presentation
5.6e-06	1.33e-05	4.14	202440_s_at	ST5	suppression of tumorigenicity 5	6764	AL353944	Hs.535845
< 1e-07	< 1e-07	0.13	201998_at	ST6GAL1	ST6 beta-galactosamide alpha-2,6-sialyltranferase 1	6480	M88163	Hs.152292
0.0001093	0.000203	4.6	228821_at	ST6GAL2	ST6 beta-galactosamide alpha-2,6-sialyltranferase 2	84620	AA740632	Hs.659360
1e-06	2.86e-06	0.095	38487_at	STAB1	stabilin 1	23166	NM_002045	Hs.134974
1e-07	3.48e-07	0.12	204150_at	STAB1	stabilin 1	23166	AL049963	Hs.288034
< 1e-07	< 1e-07	0.13	AFFX-HUMISGF3A/M97935_MB_at	STAT1	signal transducer and activator of transcription 1, 91kDa	6772	NM_019043	Hs.310421
< 1e-07	< 1e-07	0.098	206118_at	STAT4	signal transducer and activator of transcription 4	6775	AI767756	Hs.385956	Glycosaminoglycan biosynthesis - heparan sulfate
< 1e-07	< 1e-07	5.15	227179_at	STAU2	staufen double-stranded RNA binding protein 2	27067	BE535746	Hs.368884
0.0002172	0.000382	5.87	204597_x_at	STC1	stanniocalcin 1	6781	AW955612	Hs.591133
0.0005295	0.000867	6.29	204595_s_at	STC1	stanniocalcin 1	6781	NM_016657	Hs.745072	Vibrio cholerae infection
6.7e-06	1.56e-05	5.83	203439_s_at	STC2	stanniocalcin 2	8614	NM_000908	Hs.13528
2e-07	6.63e-07	21.09	203438_at	STC2	stanniocalcin 2	8614	AI590190	Hs.389027
< 1e-07	< 1e-07	0.029	225987_at	STEAP4	STEAP family member 4	79689	W73431	Hs.203717	Amoebiasis, Bacterial invasion of epithelial cells, ECM-receptor interaction, Focal adhesion, Pathways in cancer, Regulation of actin cytoskeleton, Small cell lung cancer
< 1e-07	< 1e-07	0.12	40420_at	STK10	serine/threonine kinase 10	6793	AA361361	Hs.653654	Angiotensin II mediated activation of JNK Pathway via Pyk2 dependent signaling, BCR Signaling Pathway, CD40L Signaling Pathway, Ceramide Signaling Pathway, EGF Signaling Pathway, FAS signaling pathway ( CD95 ), Fc Epsilon Receptor I Signaling in Mast Cells, fMLP induced chemokine gene expression in HMC-1 cells, HIV-I Nef: negative effector of Fas and TNF, Human Cytomegalovirus and Map Kinase Path…
< 1e-07	< 1e-07	0.14	203047_at	STK10	serine/threonine kinase 10	6793	AW500340
< 1e-07	< 1e-07	0.21	228394_at	STK10	serine/threonine kinase 10	6793	AA418074	Hs.390736	FAS signaling pathway ( CD95 ), HIV-I Nef: negative effector of Fas and TNF, IL-2 Receptor Beta Chain in T cell Activation, Induction of apoptosis through DR3 and DR4/5 Death Receptors , Apoptosis, Chagas disease (American trypanosomiasis)
< 1e-07	< 1e-07	0.18	243797_at	STK17B	serine/threonine kinase 17b	9262	BF114646	Hs.389027
7.3e-06	1.69e-05	0.19	218499_at	STK26	serine/threonine protein kinase 26	51765	AF043341	Hs.514821	The Role of Eosinophils in the Chemokine Network of Allergy, Chagas disease (American trypanosomiasis), Chemokine signaling pathway, Cytokine-cytokine receptor interaction, Cytosolic DNA-sensing pathway, Epithelial cell signaling in Helicobacter pylori infection, NOD-like receptor signaling pathway, Prion diseases, Rheumatoid arthritis, Toll-like receptor signaling pathway
4.2e-06	1.03e-05	0.17	243981_at	STK4	serine/threonine kinase 4	6789	AI376003	Hs.520339
< 1e-07	< 1e-07	0.24	236259_at	STK4	serine/threonine kinase 4	6789	BG534952	Hs.621695
< 1e-07	< 1e-07	0.23	223852_s_at	STK40	serine/threonine kinase 40	83931	AI129626	Hs.507755
< 1e-07	< 1e-07	0.036	235670_at	STX11	syntaxin 11	8676	AV685172	Hs.709277	RIG-I-like receptor signaling pathway
1.7e-06	4.57e-06	0.18	210190_at	STX11	syntaxin 11	8676	NM_021959	Hs.82887
2.8e-06	7.15e-06	4.14	202260_s_at	STXBP1	syntaxin binding protein 1	6812	AW237741	Hs.80720	Signaling of Hepatocyte Growth Factor Receptor, Bacterial invasion of epithelial cells, ErbB signaling pathway, Neurotrophin signaling pathway, Renal cell carcinoma
3.5e-06	8.72e-06	0.19	209367_at	STXBP2	syntaxin binding protein 2	6813	W07773	Hs.557655
5.09e-05	0.0001	4.11	220030_at	STYK1	serine/threonine/tyrosine kinase 1	55359	AI693688	Hs.37617
< 1e-07	< 1e-07	0.022	226068_at	SYK	spleen tyrosine kinase	6850	NM_002395	Hs.21160	Mechanism of Gene Regulation by Peroxisome Proliferators via PPARa(alpha), Shuttle for transfer of acetyl groups from mitochondria to the cytosol, Metabolic pathways, PPAR signaling pathway, Pyruvate metabolism
< 1e-07	< 1e-07	0.06	207540_s_at	SYK	spleen tyrosine kinase	6850	AW157525	Hs.368315
< 1e-07	< 1e-07	0.13	244023_at	SYK	spleen tyrosine kinase	6850	N22751	Hs.658304
7.5e-06	1.72e-05	4.13	240777_at	SYNE2	spectrin repeat containing, nuclear envelope 2	23224	R43746	Hs.92423
< 1e-07	< 1e-07	6.96	212730_at	SYNM	synemin, intermediate filament protein	23336	AI653169	Hs.10862	Metabolic pathways, Purine metabolism
< 1e-07	< 1e-07	5.2	202796_at	SYNPO	synaptopodin	11346	AU146850	Hs.505104
1e-07	3.48e-07	4.18	225721_at	SYNPO2	synaptopodin 2	171024	AI656011	Hs.584842
0.0001075	0.0002	4.39	225895_at	SYNPO2	synaptopodin 2	171024	NM_024896	Hs.591078
1e-07	3.48e-07	4.74	225720_at	SYNPO2	synaptopodin 2	171024	AK026548	Hs.595071	ER-associated degradation (ERAD) Pathway, Metabolic pathways, N-Glycan biosynthesis, Protein processing in endoplasmic reticulum
< 1e-07	3.48e-07	0.17	1552928_s_at	TAB3	TGF-beta activated kinase 1/MAP3K7 binding protein 3	257397	AA875998	Hs.446271
< 1e-07	< 1e-07	0.0073	229723_at	TAGAP	T-cell activation RhoGTPase activating protein	117289	AI860558	Hs.500775
< 1e-07	< 1e-07	0.029	242388_x_at	TAGAP	T-cell activation RhoGTPase activating protein	117289	U97075	Hs.390736	FAS signaling pathway ( CD95 ), HIV-I Nef: negative effector of Fas and TNF, IL-2 Receptor Beta Chain in T cell Activation, Induction of apoptosis through DR3 and DR4/5 Death Receptors , Apoptosis, Chagas disease (American trypanosomiasis)
< 1e-07	< 1e-07	0.16	234050_at	TAGAP	T-cell activation RhoGTPase activating protein	117289	BF339445	Hs.380138	Rac 1 cell motility signaling pathway
< 1e-07	< 1e-07	0.16	1552542_s_at	TAGAP	T-cell activation RhoGTPase activating protein	117289	NM_001456	Hs.195464	Focal adhesion, MAPK signaling pathway
5.57e-05	0.000109	0.23	206283_s_at	TAL1	T-cell acute lymphocytic leukemia 1	6886	NM_002425	Hs.2258
< 1e-07	< 1e-07	0.14	228258_at	TBC1D10C	TBC1 domain family, member 10C	374403	AI972623	Hs.488591	Metabolic pathways, Mucin type O-Glycan biosynthesis
< 1e-07	< 1e-07	4.18	228488_at	TBC1D16	TBC1 domain family, member 16	125058	NM_013410	Hs.10862	Metabolic pathways, Purine metabolism
< 1e-07	3.48e-07	0.24	204526_s_at	TBC1D8	TBC1 domain family, member 8 (with GRAM domain)	11138	NM_003334	Hs.533273	Parkinson's disease, Ubiquitin mediated proteolysis
2e-07	6.63e-07	4.99	238067_at	TBC1D8B	TBC1 domain family, member 8B (with GRAM domain)	54885	BG492488	Hs.708536
< 1e-07	< 1e-07	6.19	219771_at	TBC1D8B	TBC1 domain family, member 8B (with GRAM domain)	54885	AV756867	Hs.397705
< 1e-07	3.48e-07	7.2	226388_at	TCEA3	transcription elongation factor A (SII), 3	6920	AI300520	Hs.25590
2.6e-06	6.67e-06	4.01	211276_at	TCEAL2	transcription elongation factor A (SII)-like 2	140597	BE083088	Hs.196983
0.0001488	0.000269	4.66	227705_at	TCEAL7	transcription elongation factor A (SII)-like 7	56849	AI420144	Hs.347991
1.6e-06	4.33e-06	0.19	204158_s_at	TCIRG1	T-cell, immune regulator 1, ATPase, H+ transporting, lysosomal V0 subunit A3	10312	AI332476	Hs.520341
< 1e-07	< 1e-07	0.25	50221_at	TFEB	transcription factor EB	7942	J02639	Hs.159628	Complement and coagulation cascades
1e-07	3.48e-07	0.22	205016_at	TGFA	transforming growth factor, alpha	7039	AI961235	Hs.96885
1.9e-06	5.04e-06	0.078	203085_s_at	TGFB1	transforming growth factor, beta 1	7040	AA954994	Hs.237396
< 1e-07	< 1e-07	0.015	201506_at	TGFBI	transforming growth factor, beta-induced, 68kDa	7045	AI199541	Hs.427284
< 1e-07	< 1e-07	0.055	208944_at	TGFBR2	transforming growth factor, beta receptor II (70/80kDa)	7048	NM_004796	Hs.368307	Synaptic Proteins at the Synaptic Junction, Cell adhesion molecules (CAMs)
3e-07	9.59e-07	0.14	1566901_at	TGIF1	TGFB-induced factor homeobox 1	7050	AI803181	Hs.8769
< 1e-07	< 1e-07	0.24	201042_at	TGM2	transglutaminase 2	7052	NM_018050	Hs.591145
1.1e-06	3.1e-06	0.2	212040_at	TGOLN2	trans-golgi network protein 2	10618	AA541622	Hs.655519
2.2e-06	5.73e-06	6	235653_s_at	THAP6	THAP domain containing 6	152815	AF187858	Hs.583870
< 1e-07	< 1e-07	0.013	203887_s_at	THBD	thrombomodulin	7056	AU145890	Hs.348883
< 1e-07	< 1e-07	0.038	203888_at	THBD	thrombomodulin	7056	BG111636	Hs.631886
< 1e-07	< 1e-07	0.096	237252_at	THBD	thrombomodulin	7056	AK023348	Hs.514220	Proepithelin Conversion to Epithelin and Wound Repair Control
< 1e-07	< 1e-07	0.16	204776_at	THBS4	thrombospondin 4	7060	AK024680	Hs.471200
< 1e-07	< 1e-07	0.1	210785_s_at	THEMIS2	thymocyte selection associated family member 2	9473	NM_031213	Hs.465542
< 1e-07	< 1e-07	0.13	207571_x_at	THEMIS2	thymocyte selection associated family member 2	9473	AB032179	Hs.591901
< 1e-07	< 1e-07	8.03	222439_s_at	THRAP3	thyroid hormone receptor associated protein 3	9967	AI873273	Hs.42645
< 1e-07	< 1e-07	0.099	213135_at	TIAM1	T-cell lymphoma invasion and metastasis 1	7074	AI890191	Hs.522895
3.54e-05	7.17e-05	4.02	227866_at	TIAM2	T-cell lymphoma invasion and metastasis 2	26230	NM_018986	Hs.479116
1.46e-05	3.17e-05	4.13	229983_at	TIGD2	tigger transposable element derived 2	166815	AA890373	Hs.19156	Wnt signaling pathway
< 1e-07	< 1e-07	5.19	223181_at	TIMM21	translocase of inner mitochondrial membrane 21 homolog (yeast)	29090	AA877789	Hs.149387
6.98e-05	0.000134	4.29	201147_s_at	TIMP3	TIMP metallopeptidase inhibitor 3	7078	BC000568	Hs.191616
4e-07	1.25e-06	4.37	201148_s_at	TIMP3	TIMP metallopeptidase inhibitor 3	7078	BE779865	Hs.199695
< 1e-07	< 1e-07	22.39	201150_s_at	TIMP3	TIMP metallopeptidase inhibitor 3	7078	NM_002087	Hs.514220	Proepithelin Conversion to Epithelin and Wound Repair Control
< 1e-07	< 1e-07	4.42	214773_x_at	TIPRL	TOR signaling pathway regulator	261726	BE888744	Hs.437609
0.0002068	0.000365	0.21	208699_x_at	TKT	transketolase	7086	AA485908	Hs.465744	Control of skeletal myogenesis by HDAC & calcium/calmodulin-dependent kinase (CaMK), Growth Hormone Signaling Pathway, Insulin Signaling Pathway, Adherens junction, Aldosterone-regulated sodium reabsorption, Insulin signaling pathway, Type II diabetes mellitus
0.000141	0.000256	0.2	203254_s_at	TLN1	talin 1	7094	AU146385	Hs.445885
< 1e-07	< 1e-07	0.016	210176_at	TLR1	toll-like receptor 1	7096	AI346835	Hs.351316
< 1e-07	< 1e-07	0.038	204924_at	TLR2	toll-like receptor 2	7097	BU853579	Hs.595541
< 1e-07	< 1e-07	0.039	224341_x_at	TLR4	toll-like receptor 4	7099	NM_007191	Hs.284122	WNT Signaling Pathway, Wnt signaling pathway
< 1e-07	< 1e-07	0.068	232068_s_at	TLR4	toll-like receptor 4	7099	BC004423	Hs.414099
< 1e-07	< 1e-07	0.12	1552798_a_at	TLR4	toll-like receptor 4	7099	NM_005931	Hs.731446	Natural killer cell mediated cytotoxicity
< 1e-07	< 1e-07	0.16	221060_s_at	TLR4	toll-like receptor 4	7099	D55696	Hs.18069	Antigen processing and presentation, Lysosome
< 1e-07	< 1e-07	0.19	210166_at	TLR5	toll-like receptor 5	7100	AI743685	Hs.444986
< 1e-07	< 1e-07	0.01	229560_at	TLR8	toll-like receptor 8	51311	AF043294	Hs.469649	Cell cycle, Oocyte meiosis, Progesterone-mediated oocyte maturation
< 1e-07	< 1e-07	0.14	220832_at	TLR8	toll-like receptor 8	51311	AI459194	Hs.326035	Phosphorylation of MEK1 by cdk5/p35 down regulates the MAP kinase pathway, Prion diseases
0.0007443	0.00119	0.21	209386_at	TM4SF1	transmembrane 4 L six family member 1	4071	AI452444	Hs.655103
< 1e-07	< 1e-07	0.14	219892_at	TM6SF1	transmembrane 6 superfamily member 1	53346	NM_004041	Hs.503284	Attenuation of GPCR Signaling, b-arrestins in GPCR Desensitization, Role of b-arrestins in the activation and targeting of MAP kinases, Roles of b-arrestin-dependent Recruitment of Src Kinases in GPCR Signaling, Chemokine signaling pathway, Endocytosis, MAPK signaling pathway, Phototransduction
< 1e-07	< 1e-07	0.22	204328_at	TMC6	transmembrane channel-like 6	11322	NM_001453	Hs.348883
< 1e-07	< 1e-07	0.091	227353_at	TMC8	transmembrane channel-like 8	147138	NM_006472	Hs.533977
3e-07	9.59e-07	4.02	1558487_a_at	TMED4	transmembrane emp24 protein transport domain containing 4	222068	M85276	Hs.105806
< 1e-07	< 1e-07	6.56	225343_at	TMED8	transmembrane emp24 protein transport domain containing 8	283578	AF114264	Hs.612385
3.3e-06	8.29e-06	4.69	223523_at	TMEM108	transmembrane protein 108	66000	NM_003088	Hs.118400
< 1e-07	< 1e-07	7.25	223595_at	TMEM133	transmembrane protein 133	83935	AI678679	Hs.524477	ALK in cardiac myocytes, Cytokine-cytokine receptor interaction, TGF-beta signaling pathway
< 1e-07	< 1e-07	0.22	218999_at	TMEM140	transmembrane protein 140	55281	NM_006586	Hs.414099
1.6e-06	4.33e-06	4.73	218477_at	TMEM14A	transmembrane protein 14A	28978	AK025567	Hs.655832
3.67e-05	7.41e-05	4.35	229623_at	TMEM150C	transmembrane protein 150C	441027	BF594446	Hs.632486
< 1e-07	< 1e-07	0.05	238063_at	TMEM154	transmembrane protein 154	201799	BG287153	Hs.102788	ER-associated degradation (ERAD) Pathway, Steps in the Glycosylation of Mammalian N-linked Oligosaccarides, Metabolic pathways, N-Glycan biosynthesis, Protein processing in endoplasmic reticulum
< 1e-07	< 1e-07	0.12	226825_s_at	TMEM165	transmembrane protein 165	55858	AI860568	Hs.268874
3e-07	9.59e-07	0.2	224929_at	TMEM173	transmembrane protein 173	340061	NM_003468	Hs.17631	Basal cell carcinoma, Melanogenesis, Pathways in cancer, Wnt signaling pathway
6.8e-06	1.58e-05	0.25	224916_at	TMEM173	transmembrane protein 173	340061	AF109161	Hs.82071	Mechanism of Gene Regulation by Peroxisome Proliferators via PPARa(alpha)
3e-06	7.61e-06	4.09	224759_s_at	TMEM263	transmembrane protein 263	90488	AI742305	Hs.59159
< 1e-07	< 1e-07	0.078	1554485_s_at	TMEM37	transmembrane protein 37	140738	AA934610	Hs.123119	TGF-beta signaling pathway
< 1e-07	< 1e-07	0.17	227190_at	TMEM37	transmembrane protein 37	140738	AA732240	Hs.201858
< 1e-07	< 1e-07	9.91	219410_at	TMEM45A	transmembrane protein 45A	55076	AA670344	Hs.487027	Cystic fibrosis transmembrane conductance regulator (CFTR) and beta 2 adrenergic receptor (b2AR) pathway, mCalpain and friends in Cell motility, uCalpain and friends in Cell spread, Gastric acid secretion, Leukocyte transendothelial migration, Pathogenic Escherichia coli infection, Regulation of actin cytoskeleton
< 1e-07	3.48e-07	7.15	209656_s_at	TMEM47	transmembrane protein 47	83604	AW070776	Hs.597057
1.36e-05	2.96e-05	5.3	204807_at	TMEM5	transmembrane protein 5	10329	N73931	Hs.446083
2.08e-05	4.37e-05	4.01	237515_at	TMEM56	transmembrane protein 56	148534	AW274846	Hs.389027
1.3e-06	3.6e-06	5.74	234980_at	TMEM56	transmembrane protein 56	148534	NM_002299	Hs.551506	Carbohydrate digestion and absorption, Galactose metabolism, Metabolic pathways
0.0006898	0.00111	0.25	212279_at	TMEM97	transmembrane protein 97	27346	BG251521	Hs.202577
5e-07	1.53e-06	5.87	226604_at	TMTC3	transmembrane and tetratricopeptide repeat containing 3	160418	NM_004102	Hs.657242	PPAR signaling pathway
< 1e-07	< 1e-07	10.32	237169_at	TNC	tenascin C	3371	M90657	Hs.351316
< 1e-07	< 1e-07	16.97	216005_at	TNC	tenascin C	3371	BC007524	Hs.463439
< 1e-07	< 1e-07	58.45	201645_at	TNC	tenascin C	3371	AI732637	Hs.657046
7e-07	2.07e-06	0.18	202510_s_at	TNFAIP2	tumor necrosis factor, alpha-induced protein 2	7127	AY062002	Hs.497579	Leukocyte transendothelial migration, Non-small cell lung cancer, Pathways in cancer
8.6e-06	1.94e-05	0.14	202643_s_at	TNFAIP3	tumor necrosis factor, alpha-induced protein 3	7128	U02297	Hs.591014	Adhesion and Diapedesis of Granulocytes, Cells and Molecules involved in local acute inflammatory response, Cell adhesion molecules (CAMs), Staphylococcus aureus infection
< 1e-07	3.48e-07	0.094	206026_s_at	TNFAIP6	tumor necrosis factor, alpha-induced protein 6	7130	AF063612	Hs.118633
< 1e-07	< 1e-07	0.12	206025_s_at	TNFAIP6	tumor necrosis factor, alpha-induced protein 6	7130	AF113016	Hs.621695
9e-06	2.03e-05	0.17	210260_s_at	TNFAIP8	tumor necrosis factor, alpha-induced protein 8	25816	BF438357	Hs.444403	CCR3 signaling in Eosinophils, Integrin Signaling Pathway, PKC-catalyzed phosphorylation of inhibitory phosphoprotein of myosin phosphatase, Rac 1 cell motility signaling pathway, Rho cell motility signaling pathway, Thrombin signaling and protease-activated receptors, Vascular smooth muscle contraction
7e-07	2.07e-06	0.18	208296_x_at	TNFAIP8	tumor necrosis factor, alpha-induced protein 8	25816	AF081250	Hs.501898	Vascular smooth muscle contraction
7.72e-05	0.000148	4.05	234279_at	TNFAIP8L3	tumor necrosis factor, alpha-induced protein 8-like 3	388121	AI889380	Hs.654352
< 1e-07	< 1e-07	0.045	211163_s_at	TNFRSF10C	tumor necrosis factor receptor superfamily, member 10c, decoy without an intracellular domain	8794	AF020043	Hs.24485	Cell cycle, Oocyte meiosis
< 1e-07	< 1e-07	0.17	206222_at	TNFRSF10C	tumor necrosis factor receptor superfamily, member 10c, decoy without an intracellular domain	8794	AA910371	Hs.515162	NFAT and Hypertrophy of the heart (Transcription in the broken heart), Antigen processing and presentation, Chagas disease (American trypanosomiasis), Phagosome, Protein processing in endoplasmic reticulum
< 1e-07	< 1e-07	0.21	234644_x_at	TNFRSF10C	tumor necrosis factor receptor superfamily, member 10c, decoy without an intracellular domain	8794	AI246687	Hs.128065	Lysosome
< 1e-07	< 1e-07	0.043	203508_at	TNFRSF1B	tumor necrosis factor receptor superfamily, member 1B	7133	NM_002317	Hs.102267
3.1e-06	7.84e-06	0.23	218856_at	TNFRSF21	tumor necrosis factor receptor superfamily, member 21	27242	NM_003244	Hs.373550
< 1e-07	< 1e-07	0.027	202688_at	TNFSF10	tumor necrosis factor (ligand) superfamily, member 10	8743	NM_001110	Hs.172028	Generation of amyloid b-peptide by PS1, Alzheimer's disease, Epithelial cell signaling in Helicobacter pylori infection
1.68e-05	3.6e-05	0.19	202687_s_at	TNFSF10	tumor necrosis factor (ligand) superfamily, member 10	8743	AI346187	Hs.591607	Lysosome
5.7e-06	1.35e-05	0.17	210643_at	TNFSF11	tumor necrosis factor (ligand) superfamily, member 11	8600	BC000324	Hs.514220	Proepithelin Conversion to Epithelin and Wound Repair Control
< 1e-07	< 1e-07	0.067	223502_s_at	TNFSF13B	tumor necrosis factor (ligand) superfamily, member 13b	10673	AA237039	Hs.517717
6e-07	1.81e-06	0.18	223501_at	TNFSF13B	tumor necrosis factor (ligand) superfamily, member 13b	10673	NM_004694	Hs.42645
5.6e-06	1.33e-05	10.24	207426_s_at	TNFSF4	tumor necrosis factor (ligand) superfamily, member 4	7292	AK027194	Hs.159483	NOD-like receptor signaling pathway
4.9e-06	1.18e-05	4.67	202561_at	TNKS	tankyrase, TRF1-interacting ankyrin-related ADP-ribose polymerase	8658	AI656807	Hs.370834
0.0002242	0.000394	0.24	218864_at	TNS1	tensin 1	7145	NM_002122	Hs.387679	Allograft rejection, Antigen processing and presentation, Asthma, Autoimmune thyroid disease, Cell adhesion molecules (CAMs), Graft-versus-host disease, Intestinal immune network for IgA production, Leishmaniasis, Phagosome, Rheumatoid arthritis, Staphylococcus aureus infection, Systemic lupus erythematosus, Toxoplasmosis, Type I diabetes mellitus, Viral myocarditis
< 1e-07	< 1e-07	5.39	201690_s_at	TPD52	tumor protein D52	7163	N57538	Hs.585374
2e-07	6.63e-07	8.67	203786_s_at	TPD52L1	tumor protein D52-like 1	7164	AL080239	Hs.272284
1.1e-05	2.43e-05	0.22	200742_s_at	TPP1	tripeptidyl peptidase I	1200	BF340083	Hs.654352
< 1e-07	< 1e-07	0.046	213888_s_at	TRAF3IP3	TRAF3 interacting protein 3	80342	NM_006758	Hs.365116	Spliceosomal Assembly, Shigellosis, Spliceosome
< 1e-07	< 1e-07	0.12	205804_s_at	TRAF3IP3	TRAF3 interacting protein 3	80342	NM_144573	Hs.612385
2.55e-05	5.27e-05	0.16	225294_s_at	TRAPPC1	trafficking protein particle complex 1	58485	AI189753	Hs.351316
< 1e-07	< 1e-07	0.045	213193_x_at	TRBC1	T cell receptor beta constant 1	28639	NM_004111	Hs.409065	Base excision repair, DNA replication, Non-homologous end-joining
< 1e-07	< 1e-07	0.049	210915_x_at	TRBC1	T cell receptor beta constant 1	28639	T82147	Hs.144333	Chaperones modulate interferon Signaling Pathway
2.5e-06	6.43e-06	0.25	241133_at	TRBV27	T cell receptor beta variable 27	28560	NM_003644	Hs.462214
< 1e-07	< 1e-07	0.035	219434_at	TREM1	triggering receptor expressed on myeloid cells 1	54210	AF450243	Hs.710500
< 1e-07	< 1e-07	0.12	202241_at	TRIB1	tribbles pseudokinase 1	10221	NM_001432	Hs.115263	ErbB signaling pathway
6.9e-06	1.6e-05	5.39	230192_at	TRIM13	tripartite motif containing 13	10206	NM_022083	Hs.518662
< 1e-07	< 1e-07	9.61	202341_s_at	TRIM2	tripartite motif containing 2	23321	AI885718	Hs.713411
< 1e-07	< 1e-07	9.78	202342_s_at	TRIM2	tripartite motif containing 2	23321	NM_002228	Hs.696684	Agrin in Postsynaptic Differentiation, Angiotensin II mediated activation of JNK Pathway via Pyk2 dependent signaling, ATM Signaling Pathway, BCR Signaling Pathway, Cadmium induces DNA synthesis and proliferation in macrophages, D4-GDI Signaling Pathway, EGF Signaling Pathway, EPO Signaling Pathway, FAS signaling pathway ( CD95 ), Fc Epsilon Receptor I Signaling in Mast Cells, Hypoxia-Inducible F…
< 1e-07	< 1e-07	0.068	213293_s_at	TRIM22	tripartite motif containing 22	10346	NM_000342	Hs.443948	Collecting duct acid secretion
< 1e-07	< 1e-07	4.73	211701_s_at	TRO	trophinin	7216	M32577	Hs.409934	Allograft rejection, Antigen processing and presentation, Asthma, Autoimmune thyroid disease, Cell adhesion molecules (CAMs), Graft-versus-host disease, Intestinal immune network for IgA production, Leishmaniasis, Phagosome, Rheumatoid arthritis, Staphylococcus aureus infection, Systemic lupus erythematosus, Toxoplasmosis, Type I diabetes mellitus, Viral myocarditis
5.69e-05	0.000111	5.3	210882_s_at	TRO	trophinin	7216	AI200555	Hs.551751
6e-07	1.81e-06	6.31	211700_s_at	TRO	trophinin	7216	AL048386	Hs.339024
< 1e-07	< 1e-07	0.19	208763_s_at	TSC22D3	TSC22 domain family, member 3	1831	NM_000717	Hs.89485	Nitrogen metabolism, Proximal tubule bicarbonate reclamation
1.9e-06	5.04e-06	6.92	244521_at	TSHZ2	teashirt zinc finger homeobox 2	128553	AF132811	Hs.370510	Cell adhesion molecules (CAMs)
1.2e-06	3.35e-06	0.16	227236_at	TSPAN2	tetraspanin 2	10100	NM_005561	Hs.494419	Lysosome, Phagosome
1.18e-05	2.6e-05	9.54	202242_at	TSPAN7	tetraspanin 7	7102	NM_002526	Hs.153952	Metabolic pathways, Nicotinate and nicotinamide metabolism, Purine metabolism, Pyrimidine metabolism
1.38e-05	3e-05	4.32	228882_at	TUB	tubby bipartite transcription factor	7275	X51990	Hs.705618
8.6e-06	1.94e-05	4.61	212242_at	TUBA4A	tubulin, alpha 4a	7277	AK026589	Hs.496666
< 1e-07	< 1e-07	0.032	230690_at	TUBB1	tubulin, beta 1 class VI	81027	BE675995	Hs.508829
< 1e-07	< 1e-07	4.83	1563638_at	TVP23A	trans-golgi network vesicle protein 23 homolog A (S. cerevisiae)	780776	U13261	Hs.444986
0.0002937	0.000504	0.17	201009_s_at	TXNIP	thioredoxin interacting protein	10628	U82277	Hs.655593	Osteoclast differentiation
0.0008196	0.00131	0.19	201010_s_at	TXNIP	thioredoxin interacting protein	10628	NM_005613	Hs.386726
3.35e-05	6.8e-05	0.13	204858_s_at	TYMP	thymidine phosphorylase	1890	BG546884	Hs.699247
< 1e-07	< 1e-07	0.16	217497_at	TYMP	thymidine phosphorylase	1890	NM_006433	Hs.105806
1.9e-06	5.04e-06	5.78	202589_at	TYMS	thymidylate synthetase	7298	W84556	Hs.465744	Control of skeletal myogenesis by HDAC & calcium/calmodulin-dependent kinase (CaMK), Growth Hormone Signaling Pathway, Insulin Signaling Pathway, Adherens junction, Aldosterone-regulated sodium reabsorption, Insulin signaling pathway, Type II diabetes mellitus
< 1e-07	< 1e-07	0.0064	204122_at	TYROBP	TYRO protein tyrosine kinase binding protein	7305	AF403061	Hs.496666
5.2e-06	1.24e-05	0.24	231904_at	U2AF1	U2 small nuclear RNA auxiliary factor 1	7307	AI417194	Hs.24321	Ion Channels and Their Functional Role in Vascular Endothelium, Gap junction, Long-term depression, Purine metabolism, Salivary secretion, Vascular smooth muscle contraction
0.000503	0.000826	0.19	200964_at	UBA1	ubiquitin-like modifier activating enzyme 1	7317	NM_000201	Hs.643447	Adhesion and Diapedesis of Granulocytes, Adhesion and Diapedesis of Lymphocytes, Adhesion Molecules on Lymphocyte, B Lymphocyte Cell Surface Molecules, Cells and Molecules involved in local acute inflammatory response, CTL mediated immune response against target cells , Monocyte and its Surface Molecules, Neutrophil and Its Surface Molecules, T Cytotoxic Cell Surface Molecules, T Helper Cell Surf…
< 1e-07	< 1e-07	0.21	224783_at	UBALD2	UBA-like domain containing 2	283991	W80468	Hs.621695
0.0002088	0.000369	0.21	214590_s_at	UBE2D1	ubiquitin-conjugating enzyme E2D 1	7321	AF037351	Hs.147635	Phagosome
1.3e-06	3.6e-06	0.11	240383_at	UBE2D3	ubiquitin-conjugating enzyme E2D 3	7323	AI650353	Hs.129452
7.4e-06	1.7e-05	4.32	213822_s_at	UBE3B	ubiquitin protein ligase E3B	89910	U29113	Hs.505924
< 1e-07	< 1e-07	0.047	208998_at	UCP2	uncoupling protein 2 (mitochondrial, proton carrier)	7351	NM_013262	Hs.484738
< 1e-07	< 1e-07	0.089	208997_s_at	UCP2	uncoupling protein 2 (mitochondrial, proton carrier)	7351	AA602532	Hs.523454	Lysosome
0.000186	0.000331	4.61	238542_at	ULBP2	UL16 binding protein 2	80328	AL022067	Hs.436023
4.2e-06	1.03e-05	4.83	222616_s_at	USP16	ubiquitin specific peptidase 16	10600	NM_007214	Hs.26904	Protein export, Protein processing in endoplasmic reticulum
< 1e-07	< 1e-07	0.19	244871_s_at	USP32	ubiquitin specific peptidase 32	84669	AU118882	Hs.183713	Role of EGF Receptor Transactivation by GPCRs in Cardiac Hypertrophy, Calcium signaling pathway, Neuroactive ligand-receptor interaction, Vascular smooth muscle contraction
1.5e-06	4.09e-06	4.99	229198_at	USP35	ubiquitin specific peptidase 35	57558	M17955	Hs.409934	Allograft rejection, Antigen processing and presentation, Asthma, Autoimmune thyroid disease, Cell adhesion molecules (CAMs), Graft-versus-host disease, Intestinal immune network for IgA production, Leishmaniasis, Phagosome, Rheumatoid arthritis, Staphylococcus aureus infection, Systemic lupus erythematosus, Toxoplasmosis, Type I diabetes mellitus, Viral myocarditis
1.48e-05	3.21e-05	4.88	203870_at	USP46	ubiquitin specific peptidase 46	64854	AW157094	Hs.519601	TGF-beta signaling pathway
< 1e-07	< 1e-07	0.02	202546_at	VAMP8	vesicle-associated membrane protein 8	8673	AB019562	Hs.313	Regulators of Bone Mineralization, ECM-receptor interaction, Focal adhesion, Toll-like receptor signaling pathway
0.0005572	0.000908	4.77	235343_at	VASH2	vasohibin 2	79805	AI341142	Hs.500512
< 1e-07	< 1e-07	0.18	218807_at	VAV3	vav 3 guanine nucleotide exchange factor	10451	AI674461	Hs.529862	NFAT and Hypertrophy of the heart (Transcription in the broken heart), Hedgehog signaling pathway, Wnt signaling pathway
< 1e-07	< 1e-07	0.24	218806_s_at	VAV3	vav 3 guanine nucleotide exchange factor	10451	N90777	Hs.471200
0.0003103	0.00053	0.13	211571_s_at	VCAN	versican	1462	BC005231	Hs.472838	MAPK signaling pathway, Non-small cell lung cancer, Pathways in cancer
0.0003224	0.000549	0.2	215646_s_at	VCAN	versican	1462	AB033831	Hs.570855	Cytokine-cytokine receptor interaction, Focal adhesion, Gap junction, Melanoma, Prostate cancer, Regulation of actin cytoskeleton
0.0001077	0.0002	5.15	223089_at	VEZT	vezatin, adherens junctions transmembrane protein	55591	BI668074	Hs.502876
1.2e-06	3.35e-06	6.5	209822_s_at	VLDLR	very low density lipoprotein receptor	7436	AW977516	Hs.659360
< 1e-07	< 1e-07	0.1	205844_at	VNN1	vanin 1	8876	NM_024749	Hs.96885
< 1e-07	< 1e-07	0.015	205922_at	VNN2	vanin 2	8875	U84744	Hs.532411
< 1e-07	< 1e-07	0.17	220528_at	VNN3	vanin 3	55350	AW517711	Hs.567828
< 1e-07	< 1e-07	0.027	204787_at	VSIG4	V-set and immunoglobulin domain containing 4	11326	BC041694	Hs.481720	Fc gamma R-mediated phagocytosis
< 1e-07	< 1e-07	0.11	219679_s_at	WAC	WW domain containing adaptor with coiled-coil	51322	N30138	Hs.434914
2e-07	6.63e-07	9.38	204042_at	WASF3	WAS protein family, member 3	10810	BF700678	Hs.382306	Estrogen-responsive protein Efp controls cell cycle and breast tumors growth
2.36e-05	4.92e-05	4.3	205809_s_at	WASL	Wiskott-Aldrich syndrome-like	8976	AL162079	Hs.75231
0.0004839	0.000796	4.14	227434_at	WBSCR17	Williams-Beuren syndrome chromosome region 17	64409	AA741058	Hs.653186
3e-05	6.13e-05	0.2	243514_at	WDFY2	WD repeat and FYVE domain containing 2	115825	AI423466	Hs.479766
8.04e-05	0.000153	4.09	1552999_a_at	WFDC10B	WAP four-disulfide core domain 10B	280664	BG390306	Hs.476595
9.3e-06	2.09e-05	9.47	232602_at	WFDC3	WAP four-disulfide core domain 3	140686	AI694059	Hs.473117
0.0007511	0.0012	7.91	204712_at	WIF1	WNT inhibitory factor 1	11197	AI125562	Hs.162868
< 1e-07	< 1e-07	0.06	202663_at	WIPF1	WAS/WASL interacting protein family, member 1	7456	AV708130	Hs.731377	Bile secretion, Fat digestion and absorption, Hepatitis C, Phagosome, Vitamin digestion and absorption
< 1e-07	< 1e-07	0.071	202664_at	WIPF1	WAS/WASL interacting protein family, member 1	7456	AL552384	Hs.532815
< 1e-07	< 1e-07	0.093	202665_s_at	WIPF1	WAS/WASL interacting protein family, member 1	7456	BF438173	Hs.9914	TGF-beta signaling pathway
< 1e-07	< 1e-07	0.12	231182_at	WIPF1	WAS/WASL interacting protein family, member 1	7456	AK054833	Hs.46506
8.9e-06	2.01e-05	9.52	205792_at	WISP2	WNT1 inducible signaling pathway protein 2	8839	NM_002906	Hs.263671	Regulation of actin cytoskeleton
2.43e-05	5.06e-05	5	228950_s_at	WLS	wntless Wnt ligand secretion mediator	79971	AA812232	Hs.533977
< 1e-07	< 1e-07	8.49	221958_s_at	WLS	wntless Wnt ligand secretion mediator	79971	BC020718	Hs.312485	Complement and coagulation cascades, Staphylococcus aureus infection
5e-07	1.53e-06	10.17	228949_at	WLS	wntless Wnt ligand secretion mediator	79971	K03226	Hs.77274	Fibrinolysis Pathway, Platelet Amyloid Precursor Protein Pathway, Complement and coagulation cascades
3.55e-05	7.19e-05	0.19	232282_at	WNK3	WNK lysine deficient protein kinase 3	65267	AW027923	Hs.326822
8.1e-06	1.85e-05	0.24	228617_at	XAF1	XIAP associated factor 1	54739	NM_003831	Hs.445511
2e-07	6.63e-07	0.22	235222_x_at	XIAP	X-linked inhibitor of apoptosis, E3 ubiquitin protein ligase	331	AW167727	Hs.282787
0.0002269	0.000398	0.19	206698_at	XK	X-linked Kx blood group	7504	BC001283	Hs.644095
9e-07	2.6e-06	6.14	213725_x_at	XYLT1	xylosyltransferase I	64131	BC005961	Hs.591159
4.07e-05	8.15e-05	4.43	224953_at	YIPF5	Yip1 domain family, member 5	81555	AF082283	Hs.193516	B cell receptor signaling pathway, T cell receptor signaling pathway
< 1e-07	< 1e-07	0.076	217143_s_at	YME1L1	YME1-like 1 ATPase	10730	AI023911	Hs.89983	Complement Pathway, Lectin Induced Complement Pathway, Complement and coagulation cascades, Staphylococcus aureus infection
3e-07	9.59e-07	0.24	213830_at	YME1L1	YME1-like 1 ATPase	10730	AF306765	Hs.332422	Hypoxia-Inducible Factor in the Cardiovascular System
< 1e-07	< 1e-07	0.091	223179_at	YPEL3	yippee-like 3 (Drosophila)	83719	BF038366	Hs.199695
< 1e-07	< 1e-07	0.19	1564053_a_at	YTHDF3	YTH N(6)-methyladenosine RNA binding protein 3	253943	NM_004354	Hs.740456	p53 signaling pathway
5e-07	1.53e-06	0.24	201020_at	YWHAH	tyrosine 3-monooxygenase/tryptophan 5-monooxygenase activation protein, eta	7533	N21643	Hs.403933
< 1e-07	< 1e-07	0.2	200641_s_at	YWHAZ	tyrosine 3-monooxygenase/tryptophan 5-monooxygenase activation protein, zeta	7534	L12723	Hs.90093	Antigen processing and presentation
1e-07	3.48e-07	4.49	226252_at	ZBTB20	zinc finger and BTB domain containing 20	26137	AW269397	Hs.434298
2.9e-06	7.38e-06	6.29	227082_at	ZBTB20	zinc finger and BTB domain containing 20	26137	AF279774	Hs.134974
0.0002612	0.000453	7.3	228280_at	ZC3HAV1L	zinc finger CCCH-type, antiviral 1-like	92092	BC005980	Hs.129683	Neuroregulin receptor degredation protein-1 Controls ErbB3 receptor recycling, Protein processing in endoplasmic reticulum, Ubiquitin mediated proteolysis
< 1e-07	< 1e-07	0.19	242776_at	ZCCHC6	zinc finger, CCHC domain containing 6	79670	BQ942131	Hs.44693
< 1e-07	< 1e-07	0.12	217741_s_at	ZFAND5	zinc finger, AN1-type domain 5	7763	NM_005505	Hs.731377	Bile secretion, Fat digestion and absorption, Hepatitis C, Phagosome, Vitamin digestion and absorption
< 1e-07	< 1e-07	0.066	201531_at	ZFP36	ZFP36 ring finger protein	7538	NM_004866	Hs.482587
< 1e-07	< 1e-07	0.087	211965_at	ZFP36L1	ZFP36 ring finger protein-like 1	677	AF285167	Hs.659274	FXR and LXR Regulation of Cholesterol Metabolism, Nuclear Receptors in Lipid Metabolism and Toxicity, ABC transporters, Fat digestion and absorption
7.6e-06	1.75e-05	0.14	201369_s_at	ZFP36L2	ZFP36 ring finger protein-like 2	678	L12711	Hs.89643	Metabolic pathways, Pentose phosphate pathway
0.0001511	0.000273	0.15	201367_s_at	ZFP36L2	ZFP36 ring finger protein-like 2	678	AL136842	Hs.369574
2.1e-06	5.49e-06	0.14	1554638_at	ZFYVE16	zinc finger, FYVE domain containing 16	9765	NM_005505	Hs.731377	Bile secretion, Fat digestion and absorption, Hepatitis C, Phagosome, Vitamin digestion and absorption
2.8e-06	7.15e-06	7.66	228315_at	ZMAT3	zinc finger, matrin-type 3	64393	U63296	Hs.596913
< 1e-07	< 1e-07	4.44	1554171_at	ZMYM3	zinc finger, MYM-type 3	9203	AA644178	Hs.471508	Growth Hormone Signaling Pathway, IGF-1 Signaling Pathway, IL 4 signaling pathway, IL-2 Receptor Beta Chain in T cell Activation, Insulin Signaling Pathway, Multiple antiapoptotic pathways from IGF-1R signaling lead to BAD phosphorylation, Regulation of eIF4e and p70 S6 Kinase, Adipocytokine signaling pathway, Aldosterone-regulated sodium reabsorption, Insulin signaling pathway, Neurotrophin sign…
8.4e-06	1.91e-05	0.23	1559881_s_at	ZNF12	zinc finger protein 12	7559	AI857788	Hs.595541
2.5e-06	6.43e-06	6.9	228157_at	ZNF207	zinc finger protein 207	7756	X03348	Hs.122926	Chromatin Remodeling by hSWI/SNF ATP-dependent Complexes, Corticosteroids and cardioprotection, NFkB activation by Nontypeable Hemophilus influenzae, Visceral Fat Deposits and the Metabolic Syndrome, Neuroactive ligand-receptor interaction
1e-07	3.48e-07	0.23	214714_at	ZNF394	zinc finger protein 394	84124	AI458949	Hs.520414	Chaperones modulate interferon Signaling Pathway, IFN gamma signaling pathway , Selective expression of chemokine receptors during T-cell polarization, Th1/Th2 Differentiation, Chagas disease (American trypanosomiasis), Cytokine-cytokine receptor interaction, Jak-STAT signaling pathway, Leishmaniasis, Natural killer cell mediated cytotoxicity, Osteoclast differentiation, Toxoplasmosis
< 1e-07	< 1e-07	0.2	206829_x_at	ZNF430	zinc finger protein 430	80264	AI110886	Hs.643599
0.000145	0.000263	4.35	243491_at	ZNF431	zinc finger protein 431	170959	BE708432	Hs.621695
1.43e-05	3.11e-05	11.02	244663_at	ZNF431	zinc finger protein 431	170959	AL136903	Hs.427284
< 1e-07	< 1e-07	0.21	214746_s_at	ZNF467	zinc finger protein 467	168544	AA045174	Hs.202577
1.8e-06	4.8e-06	4.78	232604_at	ZNF541	zinc finger protein 541	84215	AI128225	Hs.347270	Allograft rejection, Antigen processing and presentation, Asthma, Autoimmune thyroid disease, Cell adhesion molecules (CAMs), Graft-versus-host disease, Intestinal immune network for IgA production, Leishmaniasis, Phagosome, Rheumatoid arthritis, Staphylococcus aureus infection, Systemic lupus erythematosus, Toxoplasmosis, Type I diabetes mellitus, Viral myocarditis
7.9e-06	1.8e-05	0.2	205594_at	ZNF652	zinc finger protein 652	22834	NM_005794	Hs.272499
1.2e-06	3.35e-06	4.75	242915_at	ZNF682	zinc finger protein 682	91120	AK090497	Hs.585440
< 1e-07	< 1e-07	4.69	243816_at	ZNF70	zinc finger protein 70	7621	AL037917	Hs.621695
< 1e-07	3.48e-07	12.17	228988_at	ZNF711	zinc finger protein 711	7552	BG285837	Hs.659013
< 1e-07	< 1e-07	4.01	238510_at	ZNF720	zinc finger protein 720	124411	NM_022977	Hs.268785	Adipocytokine signaling pathway, Fatty acid metabolism, Metabolic pathways, Peroxisome, PPAR signaling pathway
< 1e-07	< 1e-07	4.06	217665_at	ZNF813	zinc finger protein 813	126017	AI377389	Hs.529862	NFAT and Hypertrophy of the heart (Transcription in the broken heart), Hedgehog signaling pathway, Wnt signaling pathway
6e-07	1.81e-06	4.13	228630_at	ZNF84	zinc finger protein 84	7637	D88357	Hs.732435	Activation of Src by Protein-tyrosine phosphatase alpha, AKAP95 role in mitosis and chromosome dynamics, cdc25 and chk1 Regulatory Pathway in response to DNA damage, Cell Cycle: G1/S Check Point , Cell Cycle: G2/M Checkpoint, Cyclins and Cell Cycle Regulation, Estrogen-responsive protein Efp controls cell cycle and breast tumors growth, How Progesterone Initiates the Oocyte Maturation, Protein Ki…
< 1e-07	< 1e-07	4.1	225959_s_at	ZNRF1	zinc and ring finger 1, E3 ubiquitin protein ligase	84937	BC005276	Hs.75765	Chemokine signaling pathway, Cytokine-cytokine receptor interaction, NOD-like receptor signaling pathway
1.32e-05	2.89e-05	4.12	223382_s_at	ZNRF1	zinc and ring finger 1, E3 ubiquitin protein ligase	84937	BE889628	Hs.482910
< 1e-07	3.48e-07	0.074	200808_s_at	ZYX	zyxin	7791	NM_002820	Hs.591159
3e-07	9.59e-07	0.13	215706_x_at	ZYX	zyxin	7791	AL022726	Hs.519601	TGF-beta signaling pathway

## Sheet: Common DEGs
Parametric p-value	FDR	Fold-change PCOS Group (Cumulus/Granulosa)	ProbeSet	Symbol	Name	EntrezID	Accession	UGCluster	DefinedGenelist
2.1e-06	3.36e-06	0.083	204446_s_at	ALOX5	arachidonate 5-lipoxygenase	240	NM_000698	Hs.89499	Eicosanoid Metabolism, Arachidonic acid metabolism, Metabolic pathways, Toxoplasmosis
3.7e-06	5.73e-06	0.13	214366_s_at	ALOX5	arachidonate 5-lipoxygenase	240	AA995910	Hs.89499	Eicosanoid Metabolism, Arachidonic acid metabolism, Metabolic pathways, Toxoplasmosis
1.7e-05	2.4e-05	0.21	204445_s_at	ALOX5	arachidonate 5-lipoxygenase	240	AI361850	Hs.89499	Eicosanoid Metabolism, Arachidonic acid metabolism, Metabolic pathways, Toxoplasmosis
< 1e-07	< 1e-07	13.68	213745_at	ATRNL1	attractin-like 1	26033	AW151108	Hs.501127
3e-07	4.97e-07	5.08	213744_at	ATRNL1	attractin-like 1	26033	AI817331	Hs.501127
< 1e-07	< 1e-07	0.032	208651_x_at	CD24	CD24 molecule	100133941	M58664	Hs.644105	Hematopoietic cell lineage
< 1e-07	< 1e-07	0.027	216379_x_at	CD24	CD24 molecule	100133941	AK000168	Hs.644105	Hematopoietic cell lineage
< 1e-07	< 1e-07	0.034	209771_x_at	CD24	CD24 molecule	100133941	AA761181	Hs.644105	Hematopoietic cell lineage
< 1e-07	< 1e-07	0.035	266_s_at	CD24	CD24 molecule	100133941	L33930	Hs.644105	Hematopoietic cell lineage
< 1e-07	< 1e-07	0.04	208650_s_at	CD24	CD24 molecule	100133941	BG327863	Hs.644105	Hematopoietic cell lineage
< 1e-07	< 1e-07	0.051	206115_at	EGR3	early growth response 3	1960	NM_004430	Hs.534313	Neuropeptides VIP and PACAP inhibit the apoptosis of activated T cells
6e-06	9e-06	0.12	207768_at	EGR4	early growth response 4	1961	NM_001965	Hs.3052
< 1e-07	< 1e-07	0.022	202768_at	FOSB	FBJ murine osteosarcoma viral oncogene homolog B	2354	NM_006732	Hs.590958	FOSB gene expression and drug abuse, Osteoclast differentiation
< 1e-07	< 1e-07	0.0093	217232_x_at	HBB	hemoglobin, beta	3043	AF059180	Hs.523443	Hemoglobin Chaperone, African trypanosomiasis, Malaria
< 1e-07	< 1e-07	0.0042	209116_x_at	HBB	hemoglobin, beta	3043	M25079	Hs.523443	Hemoglobin Chaperone, African trypanosomiasis, Malaria
< 1e-07	< 1e-07	0.01	211696_x_at	HBB	hemoglobin, beta	3043	AF349114	Hs.523443	Hemoglobin Chaperone, African trypanosomiasis, Malaria
< 1e-07	1.92e-07	0.15	219671_at	HPCAL4	hippocalcin like 4	51440	AL136591	Hs.743975
< 1e-07	< 1e-07	0.038	226333_at	IL6R	interleukin 6 receptor	3570	AV700030	Hs.135087	IL 6 signaling pathway, Role of ERBB2 in Signal Transduction and Oncology, Cytokine-cytokine receptor interaction, Hematopoietic cell lineage, Jak-STAT signaling pathway
< 1e-07	< 1e-07	0.064	205945_at	IL6R	interleukin 6 receptor	3570	NM_000565	Hs.135087	IL 6 signaling pathway, Role of ERBB2 in Signal Transduction and Oncology, Cytokine-cytokine receptor interaction, Hematopoietic cell lineage, Jak-STAT signaling pathway
< 1e-07	< 1e-07	20.9	212327_at	LIMCH1	LIM and calponin homology domains 1	22998	AK026815	Hs.335163
< 1e-07	< 1e-07	19.6	212328_at	LIMCH1	LIM and calponin homology domains 1	22998	AB029025	Hs.335163
< 1e-07	< 1e-07	0.15	210075_at	MARCH2	membrane-associated ring finger (C3HC4) 2, E3 ubiquitin protein ligase	51257	AF151074	Hs.631861
< 1e-07	< 1e-07	0.0045	204959_at	MNDA	myeloid cell nuclear differentiation antigen	4332	NM_002432	Hs.153837
1.13e-05	1.64e-05	0.074	210729_at	NPY2R	neuropeptide Y receptor Y2	4887	U32500	Hs.37125	Neuroactive ligand-receptor interaction
< 1e-07	< 1e-07	0.013	218723_s_at	RGCC	regulator of cell cycle	28984	NM_014059	Hs.507866
< 1e-07	< 1e-07	0.0017	202917_s_at	S100A8	S100 calcium binding protein A8	6279	NM_002964	Hs.416073
< 1e-07	< 1e-07	0.038	214370_at	S100A8	S100 calcium binding protein A8	6279	AW238654	Hs.416073
< 1e-07	< 1e-07	18.22	224959_at	SLC26A2	solute carrier family 26 (anion exchanger), member 2	1836	AI718385	Hs.302738
< 1e-07	1.92e-07	17.12	205097_at	SLC26A2	solute carrier family 26 (anion exchanger), member 2	1836	AI025519	Hs.302738
1e-07	1.92e-07	21.28	224963_at	SLC26A2	solute carrier family 26 (anion exchanger), member 2	1836	AK025078	Hs.302738
< 1e-07	< 1e-07	0.11	204368_at	SLCO2A1	solute carrier organic anion transporter family, member 2A1	6578	NM_005630	Hs.518270
3e-07	4.97e-07	10.25	219274_at	TSPAN12	tetraspanin 12	23554	NM_012338	Hs.16529
0.0001076	0.000148	4.48	230626_at	TSPAN12	tetraspanin 12	23554	AI056699	Hs.16529
Parametric p-value	FDR	Fold-change Normal Group (Cumulus/Granulosa)	ProbeSet	Symbol	Name	EntrezID	Accession	UGCluster	DefinedGenelist
< 1e-07	< 1e-07	8.53	204446_s_at	ALOX5	arachidonate 5-lipoxygenase	240	NM_000698	Hs.89499	Eicosanoid Metabolism, Arachidonic acid metabolism, Metabolic pathways, Toxoplasmosis
0.0003332	0.00058	0.23	213745_at	ATRNL1	attractin-like 1	26033	AW151108	Hs.501127
1.18e-05	4.05e-05	11.98	208650_s_at	CD24	CD24 molecule	100133941	BG327863	Hs.644105	Hematopoietic cell lineage
0.0001811	0.000414	7.39	266_s_at	CD24	CD24 molecule	100133941	L33930	Hs.644105	Hematopoietic cell lineage
0.0002062	0.000442	5.19	208651_x_at	CD24	CD24 molecule	100133941	M58664	Hs.644105	Hematopoietic cell lineage
0.0003342	0.00058	5.98	216379_x_at	CD24	CD24 molecule	100133941	AK000168	Hs.644105	Hematopoietic cell lineage
0.0003381	0.00058	5.61	209771_x_at	CD24	CD24 molecule	100133941	AA761181	Hs.644105	Hematopoietic cell lineage
4e-07	2.13e-06	7.85	206115_at	EGR3	early growth response 3	1960	NM_004430	Hs.534313	Neuropeptides VIP and PACAP inhibit the apoptosis of activated T cells
< 1e-07	< 1e-07	25.68	207768_at	EGR4	early growth response 4	1961	NM_001965	Hs.3052
< 1e-07	6.86e-07	4.23	207767_s_at	EGR4	early growth response 4	1961	NM_001965	Hs.3052
3e-07	1.8e-06	16.79	202768_at	FOSB	FBJ murine osteosarcoma viral oncogene homolog B	2354	NM_006732	Hs.590958	FOSB gene expression and drug abuse, Osteoclast differentiation
5.3e-06	2.12e-05	11.3	211696_x_at	HBB	hemoglobin, beta	3043	AF349114	Hs.523443	Hemoglobin Chaperone, African trypanosomiasis, Malaria
1.41e-05	4.5e-05	12.86	209116_x_at	HBB	hemoglobin, beta	3043	M25079	Hs.523443	Hemoglobin Chaperone, African trypanosomiasis, Malaria
1.5e-05	4.5e-05	8.43	217232_x_at	HBB	hemoglobin, beta	3043	AF059180	Hs.523443	Hemoglobin Chaperone, African trypanosomiasis, Malaria
< 1e-07	< 1e-07	5.24	219671_at	HPCAL4	hippocalcin like 4	51440	AL136591	Hs.743975
< 1e-07	< 1e-07	4.24	205945_at	IL6R	interleukin 6 receptor	3570	NM_000565	Hs.135087	IL 6 signaling pathway, Role of ERBB2 in Signal Transduction and Oncology, Cytokine-cytokine receptor interaction, Hematopoietic cell lineage, Jak-STAT signaling pathway
< 1e-07	< 1e-07	4.56	226333_at	IL6R	interleukin 6 receptor	3570	AV700030	Hs.135087	IL 6 signaling pathway, Role of ERBB2 in Signal Transduction and Oncology, Cytokine-cytokine receptor interaction, Hematopoietic cell lineage, Jak-STAT signaling pathway
0.0008659	0.0013	0.25	212328_at	LIMCH1	LIM and calponin homology domains 1	22998	AB029025	Hs.335163
8e-06	2.95e-05	6.8	204959_at	MNDA	myeloid cell nuclear differentiation antigen	4332	NM_002432	Hs.153837
5.26e-05	0.000133	4.93	210729_at	NPY2R	neuropeptide Y receptor Y2	4887	U32500	Hs.37125	Neuroactive ligand-receptor interaction
1.88e-05	5.31e-05	5	218723_s_at	RGCC	regulator of cell cycle	28984	NM_014059	Hs.507866
9.49e-05	0.000228	5.87	202917_s_at	S100A8	S100 calcium binding protein A8	6279	NM_002964	Hs.416073
0.000906	0.00132	0.23	205097_at	SLC26A2	solute carrier family 26 (anion exchanger), member 2	1836	AI025519	Hs.302738
0.0002222	0.000444	5.16	204368_at	SLCO2A1	solute carrier organic anion transporter family, member 2A1	6578	NM_005630	Hs.518270
0.0005193	0.000831	0.23	219274_at	TSPAN12	tetraspanin 12	23554	NM_012338	Hs.16529

## Sheet: Normal-specific DEGs
Parametric p-value	FDR	Fold-change (Cumulus/Granulosa)	ProbeSet	Symbol	Name	EntrezID	Accession	UGCluster	DefinedGenelist
3.94e-05	4.77e-05	4.66	202672_s_at	ATF3	activating transcription factor 3	467	NM_001674	Hs.460
5.16e-05	5.93e-05	4.09	215506_s_at	DIRAS3	DIRAS family, GTP-binding RAS-like 3	9077	AK021882	Hs.194695
< 1e-07	4.6e-07	4.37	1558501_at	DNM3	dynamin 3	26052	AI631915	Hs.654775	Bacterial invasion of epithelial cells, Endocytosis, Fc gamma R-mediated phagocytosis
8e-07	2.04e-06	7.09	230425_at	EPHB1	EPH receptor B1	2047	AI674183	Hs.116092	Eph Kinases and ephrins support platelet aggregation, Axon guidance
< 1e-07	< 1e-07	7.4	206018_at	FOXG1	forkhead box G1	2290	NM_005249	Hs.632336
1.23e-05	1.77e-05	4.73	214240_at	GAL	galanin/GMAP prepropeptide	51083	AL556409	Hs.278959
2e-06	4.02e-06	6.48	235122_at	HIVEP3	human immunodeficiency virus type I enhancer binding protein 3	59269	AI800713	Hs.403972
< 1e-07	< 1e-07	4.34	226218_at	IL7R	interleukin 7 receptor	3575	BE217880	Hs.591742	IL-7 Signal Transduction, Cytokine-cytokine receptor interaction, Hematopoietic cell lineage, Jak-STAT signaling pathway, Primary immunodeficiency
2e-07	6.57e-07	6.24	217546_at	MT1M	metallothionein 1M	4499	R06655	Hs.647370
4e-06	6.13e-06	5.04	215870_s_at	PLA2G5	phospholipase A2, group V	5322	AL158172	Hs.319438	alpha-Linolenic acid metabolism, Arachidonic acid metabolism, Ether lipid metabolism, Fat digestion and absorption, Fc epsilon RI signaling pathway, Glycerophospholipid metabolism, GnRH signaling pathway, Linoleic acid metabolism, Long-term depression, MAPK signaling pathway, Metabolic pathways, Pancreatic secretion, Toxoplasmosis, Vascular smooth muscle contraction, VEGF signaling pathway
2e-07	6.57e-07	5.11	214044_at	RYR2	ryanodine receptor 2 (cardiac)	6262	BE968750	Hs.109514	Actions of Nitric Oxide in the Heart, Arrhythmogenic right ventricular cardiomyopathy (ARVC), Calcium signaling pathway, Cardiac muscle contraction, Dilated cardiomyopathy, Hypertrophic cardiomyopathy (HCM), Pancreatic secretion
4e-07	1.15e-06	4.28	235417_at	SPOCD1	SPOC domain containing 1	90853	BF689253	Hs.62604
< 1e-07	< 1e-07	5.22	232313_at	TMEM132C	transmembrane protein 132C	92293	AL122107	Hs.49599
2e-06	4.02e-06	0.23	203824_at	TSPAN8	tetraspanin 8	7103	NM_004616	Hs.170563
